# Supplementary material for: Electrochemical selenylative ipso-annulation of N-benzylacrylamides to construct seleno-azaspiro[4.5]decadienones
Source: Royal Society of Chemistry journal article supplement (doi:10.1039/d4ob00805g), 2024-01-01
Supplement: d4ob00805g1.pdf [file d4ob00805g1.pdf]

## Electrochemical selenylative *ipso*-Annulation of *N*-benzylacrylamides to seleno-azaspiro[4.5]decadienones

Chada Raji Reddy,<sup>\*,a,b</sup> Jannatul Islam,<sup>a,b</sup> Thallamapuram Nagendraprasad,<sup>a</sup>  
and Uprety Ajaykumar<sup>a,b</sup>

<sup>a</sup>Department of Organic Synthesis & Process Chemistry, CSIR-Indian Institute of Chemical Technology, Hyderabad 500007, India

<sup>b</sup>Academy of Scientific and Innovative Research (AcSIR) Ghaziabad 201 002, India

### Table of Contents

|                                                                                                                   |                                  |
|-------------------------------------------------------------------------------------------------------------------|----------------------------------|
| 1. Structure of starting materials                                                                                | S <sub>2</sub>                   |
| 2. Visual representation of the reaction set-up                                                                   | S <sub>3</sub>                   |
| 3. Control experiment                                                                                             | S <sub>3</sub>                   |
| 4. <sup>1</sup> H NMR, <sup>13</sup> C NMR, <sup>19</sup> F and <sup>77</sup> Se spectral copies of all compounds | S <sub>4</sub> - S <sub>48</sub> |
| 5. HRMS of TEMPO adduct                                                                                           | S <sub>49</sub>                  |

## 1. Structures of *N*-Benzylacrylamides

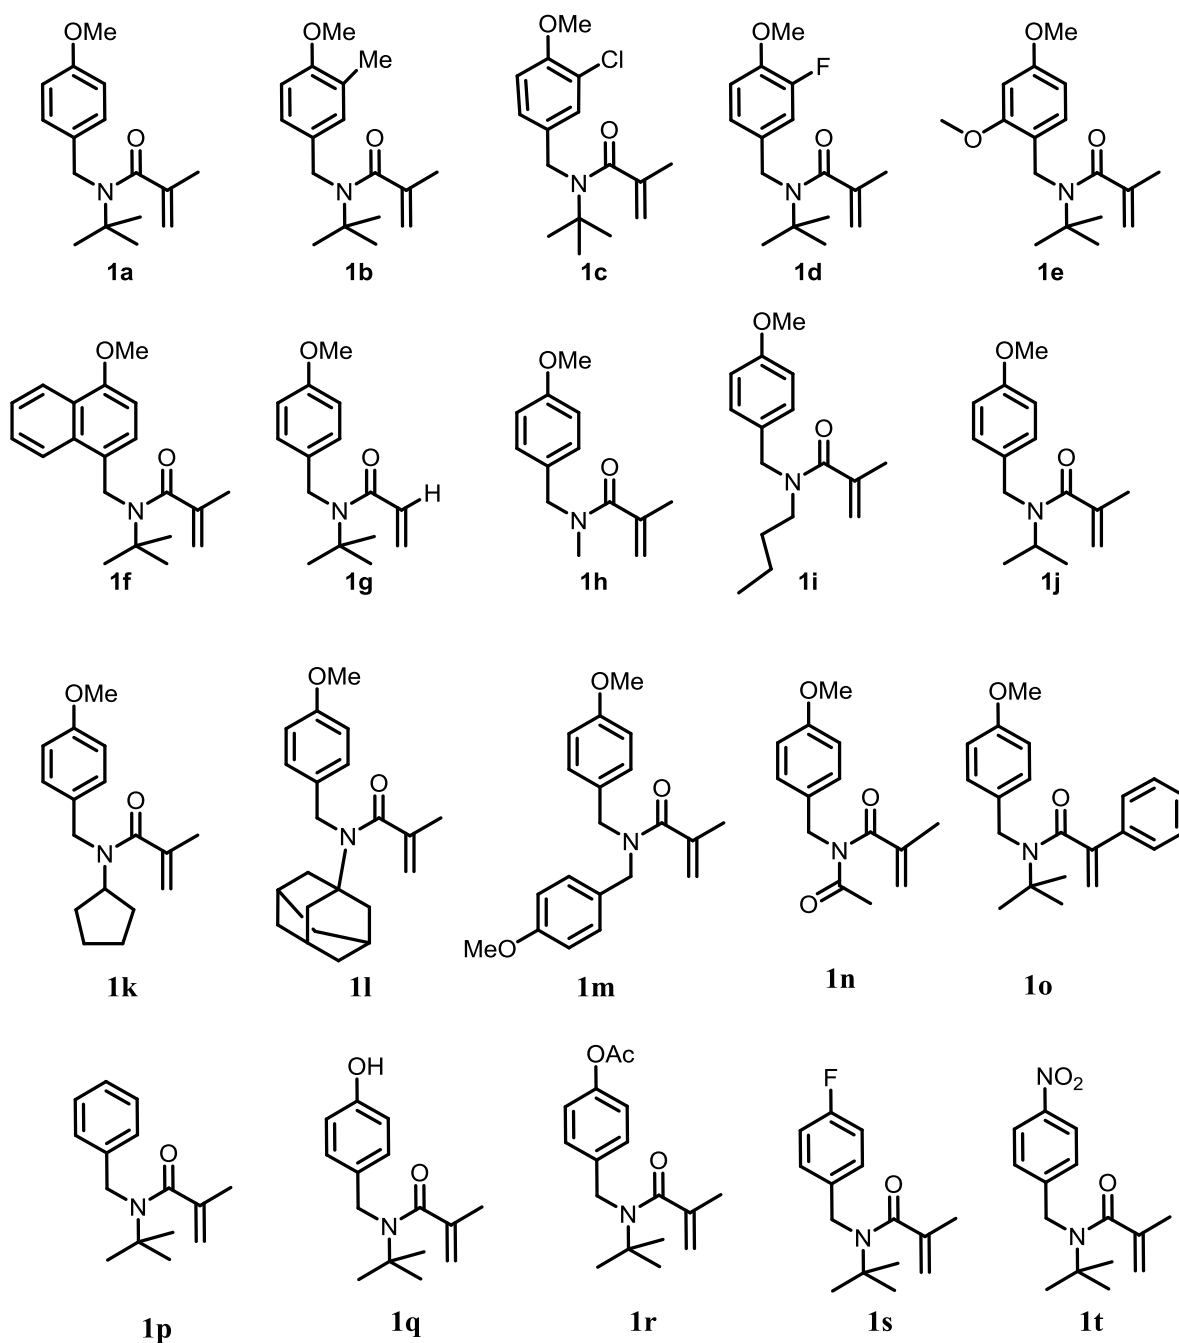

All of the starting materials **1a** to **1m** and **1o** to **1t** were prepared based on literature reports, and the spectral data was compared.

### *N*-Acetyl-*N*-(4-methoxybenzyl)methacrylamide (**1n**):

White liquid, 667 mg, 90% yield,  $R_f = 0.8$  (Ethyl Acetate : Hexane = 2:8);  $^1\text{H}$  NMR (300 MHz,  $\text{CDCl}_3$ )  $\delta$  7.20 (d,  $J = 8.6$  Hz, 2H), 6.84 (d,  $J = 8.6$  Hz, 2H), 5.38 (d,  $J = 31.6$  Hz, 2H), 4.88 (s, 2H), 3.78 (s, 3H), 2.28 (s, 3H), 1.95 (s, 3H);  $^{13}\text{C}$  NMR (101 MHz,  $\text{CDCl}_3$ )  $\delta$  175.3, 173.0, 158.9, 142.1, 129.3 (3C), 121.3, 113.9, 55.2, 48.0, 26.4, 18.8; HRMS (ESI):  $m/z$  calcd for  $\text{C}_{14}\text{H}_{18}\text{NO}_3$  ( $\text{M}+\text{H}$ ) $^+$  248.1287, Found 248.1294.

## 2. Visual representation of the reaction set-up:

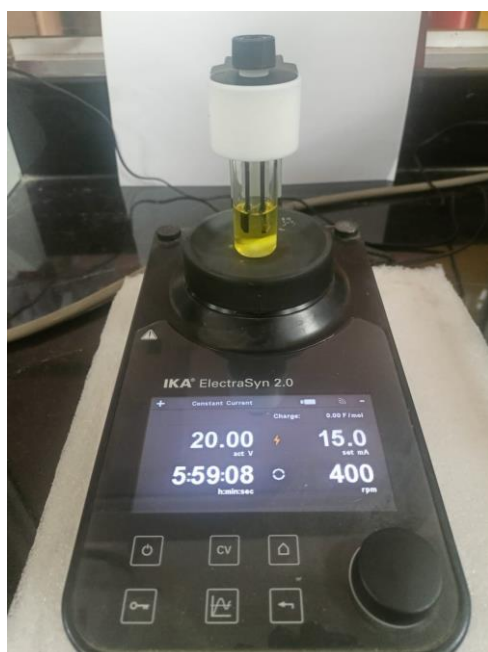

A. Initiation of the reaction

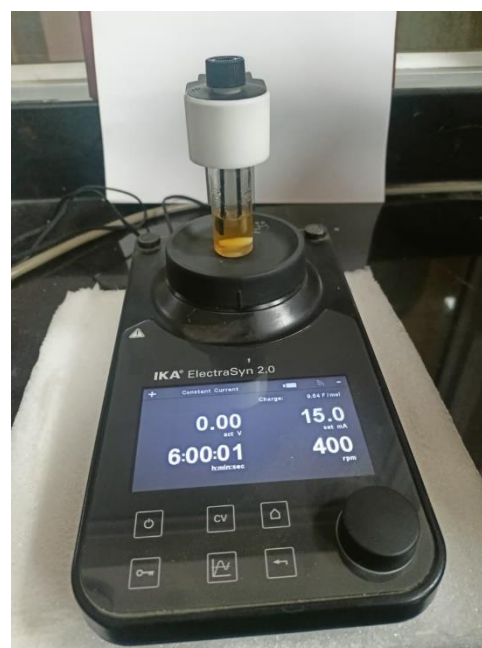

B. Completion of the reaction

## 3. Control Experiment

### A. Radical trapping reaction with 2,2,6,6-tetramethylpiperidin-1-yl)oxidanyl (TEMPO):

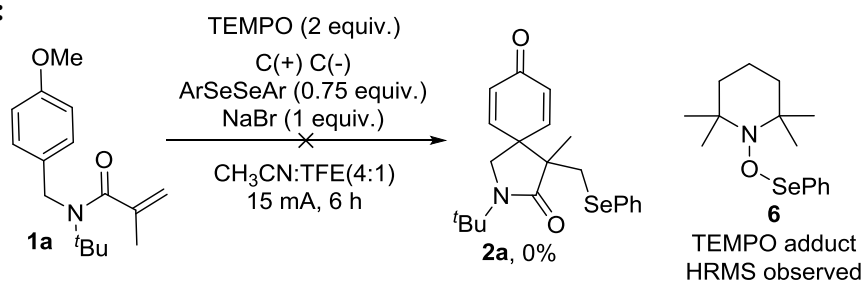

A 10 mL electro vial was charged with substrate (0.3 mmol, 1 equiv.), Diphenyl Diselenide ((PhSe)<sub>2</sub>) (0.225 mmol, 0.75 equiv.), sodium bromide (NaBr) (0.3 mmol, 1 equiv.), and TEMPO (0.6 mmol, 2 equiv.), CH<sub>3</sub>CN: TFE (4:1) (5mL) and a magnetic stir bar. The vial was equipped with carbon electrodes (8 x 52.5 x 2 mm) as the cathode and a carbon electrode (8 x 52.5 x 2 mm) as the anode. The whole cell was an undivided cell. The reaction mixture was stirred and electrolyzed at a constant current of 15 mA at room temperature for 6 h (progress of the reaction was monitored by the TLC) and the reaction was found to be inhibited.

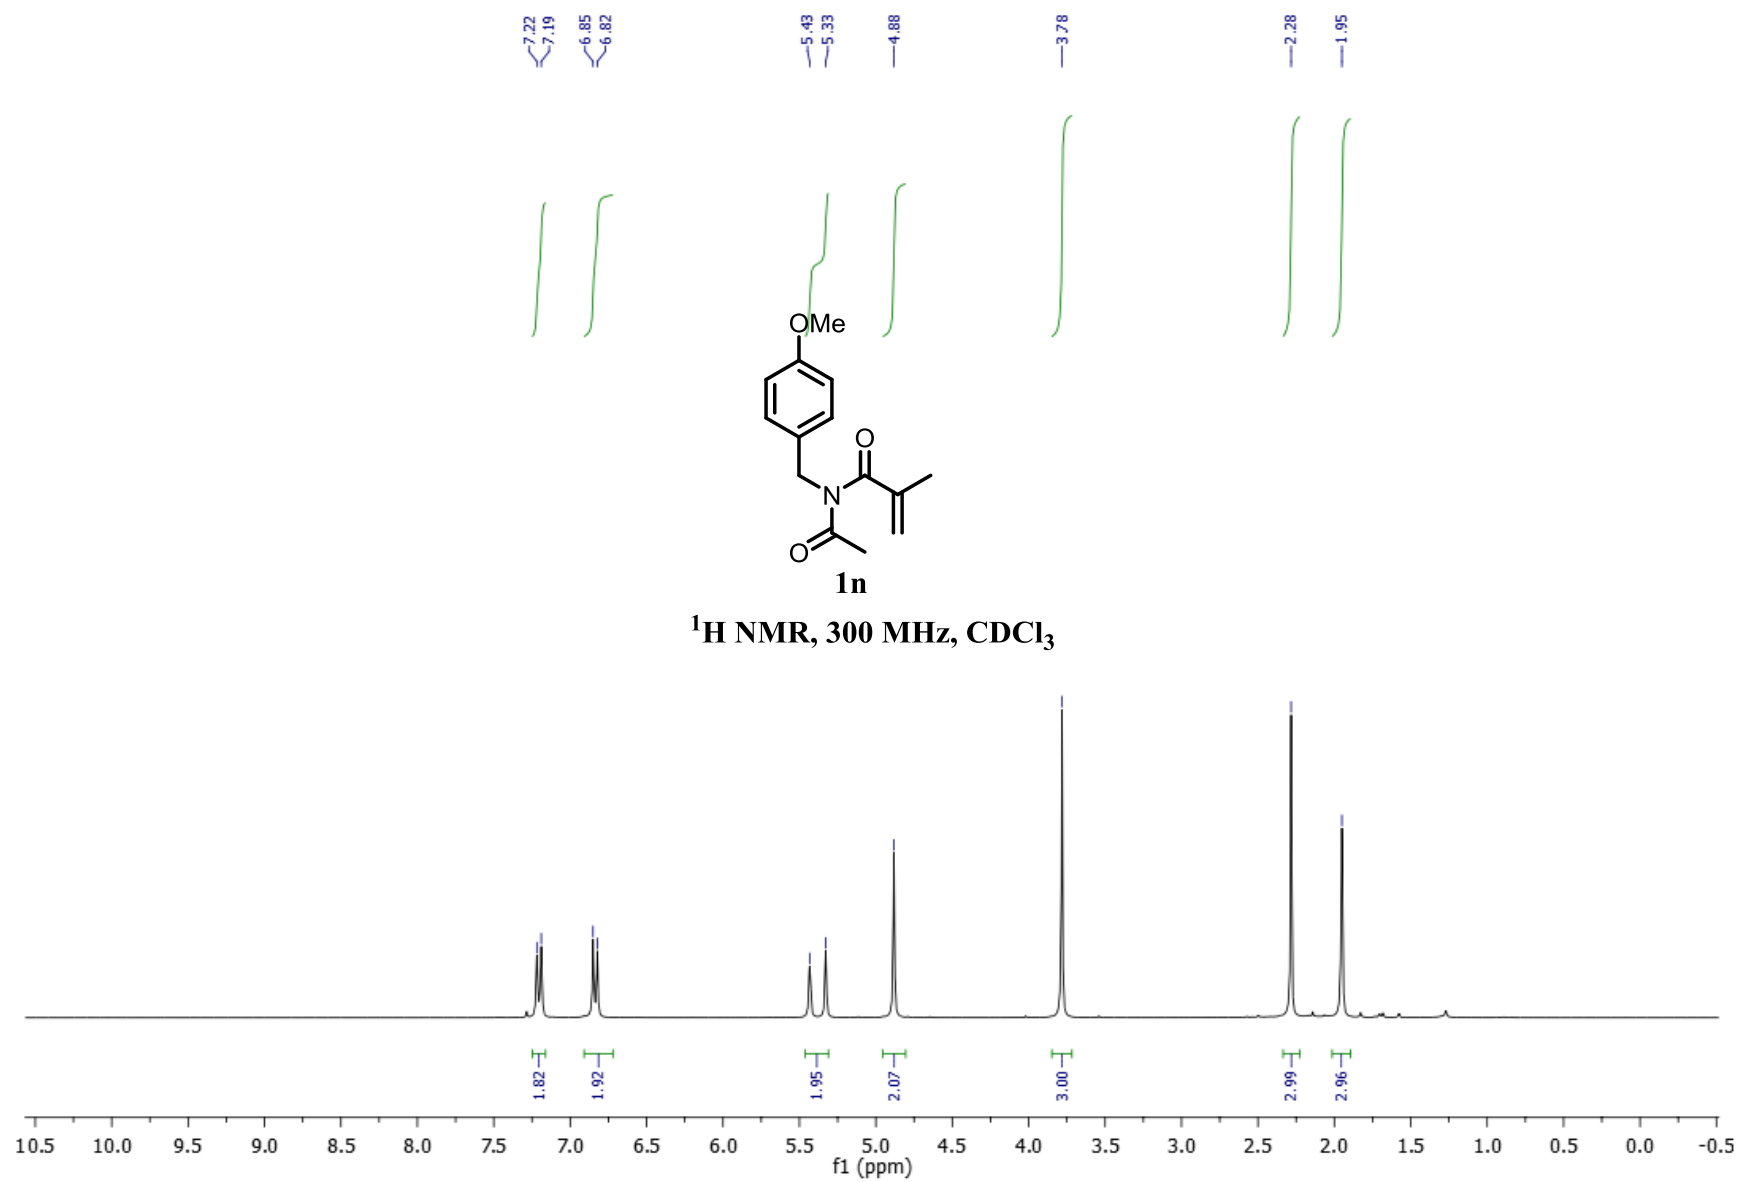

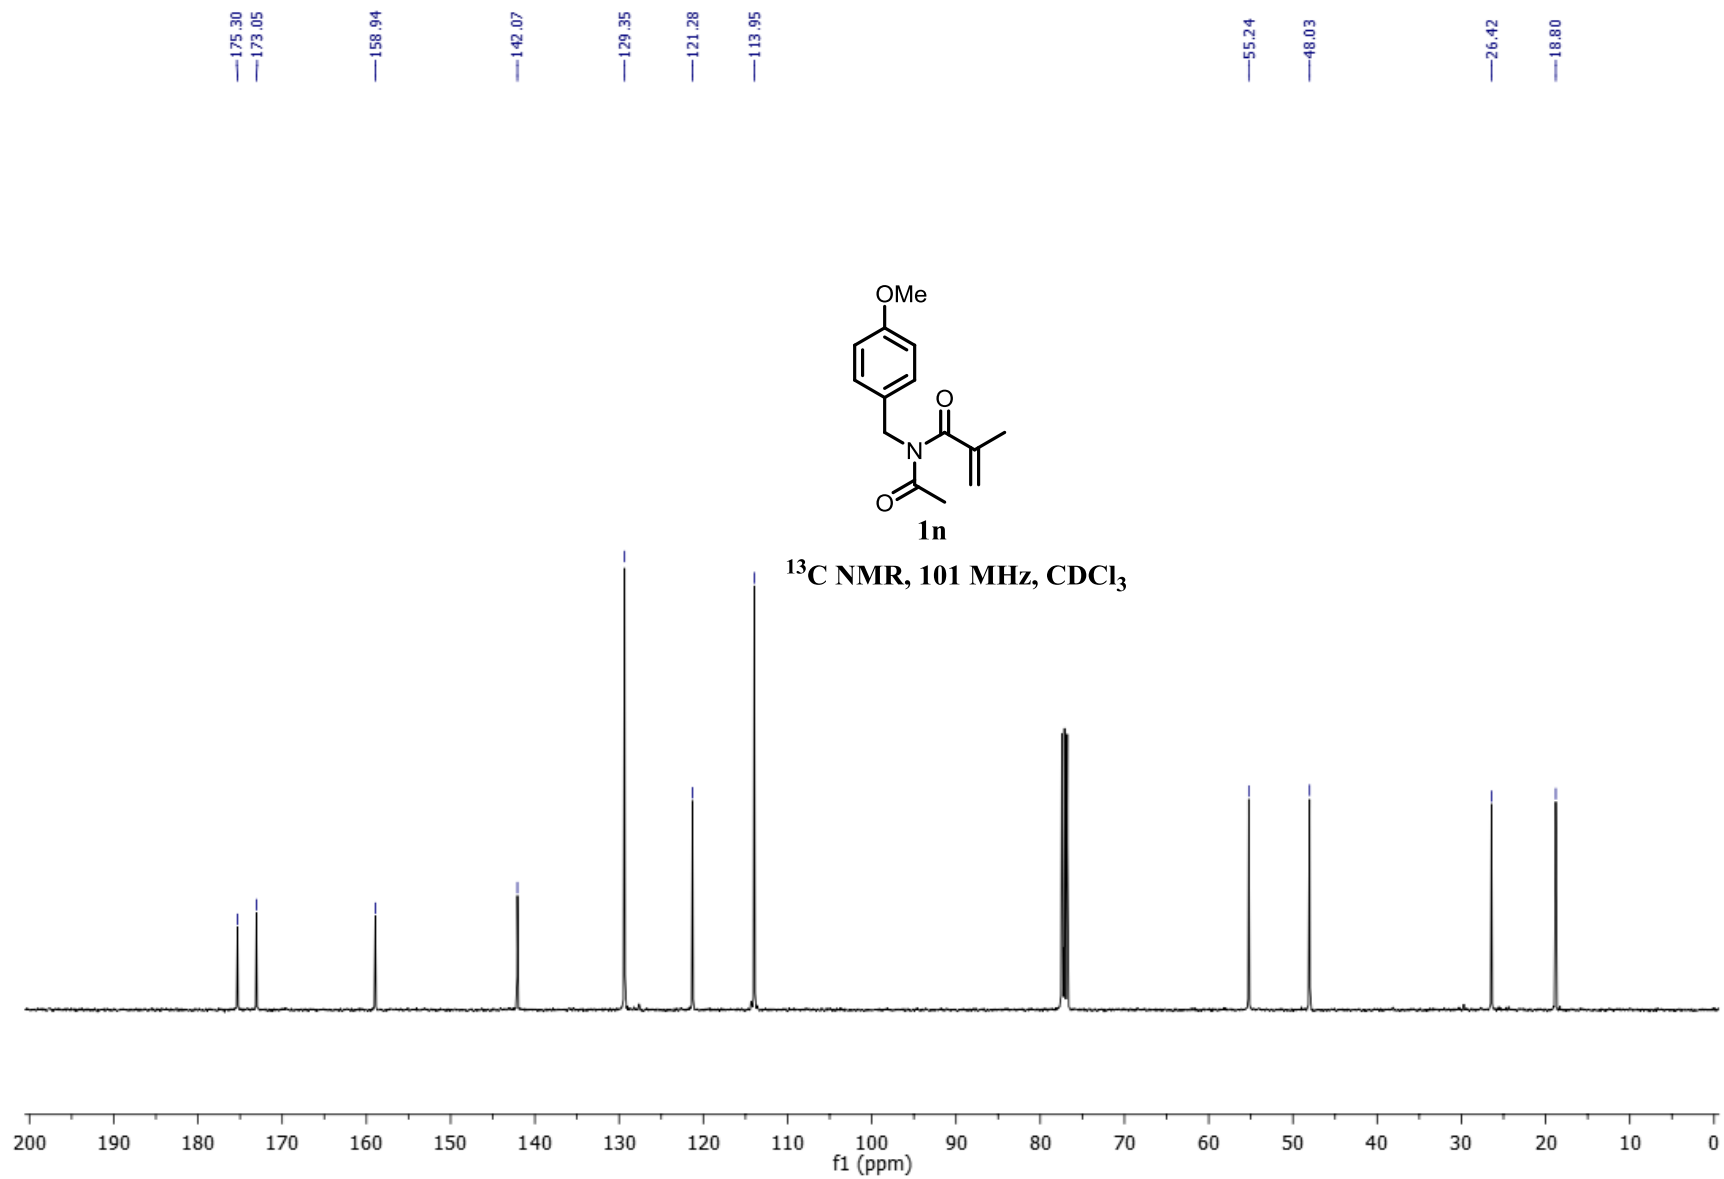

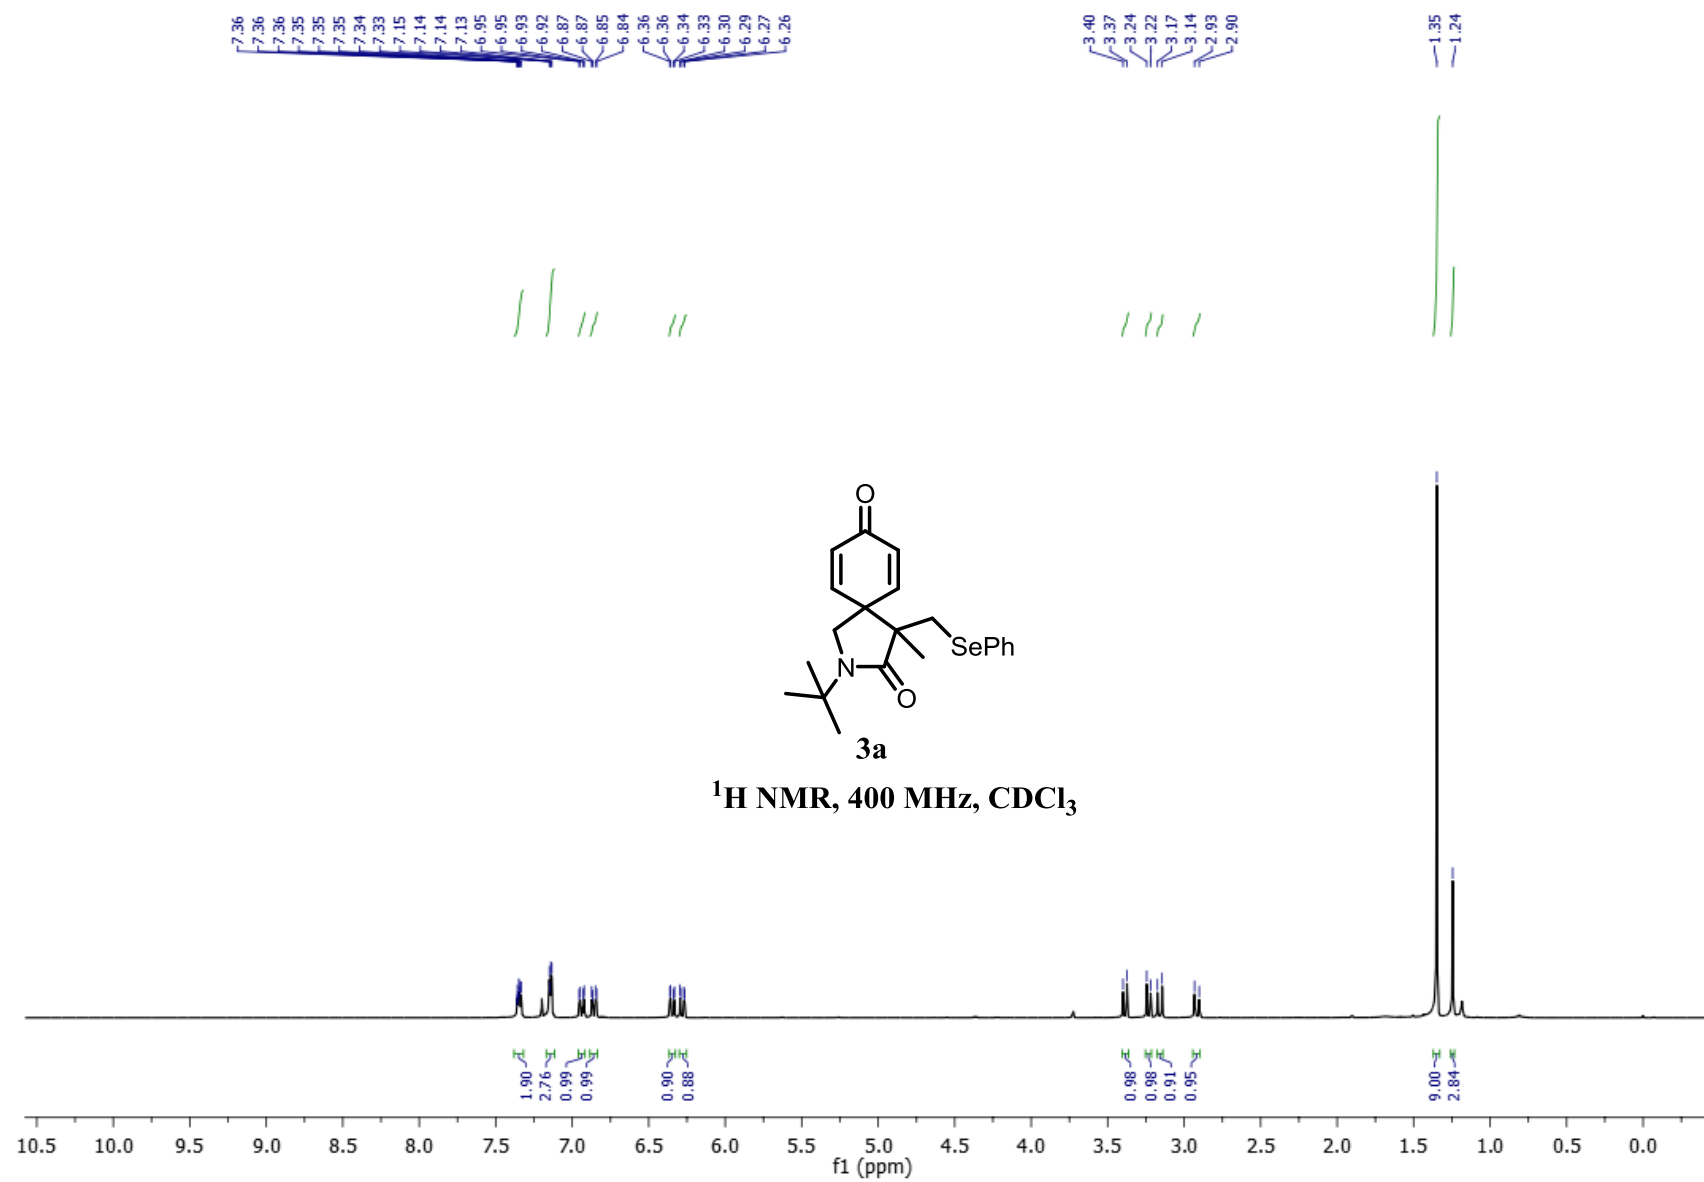

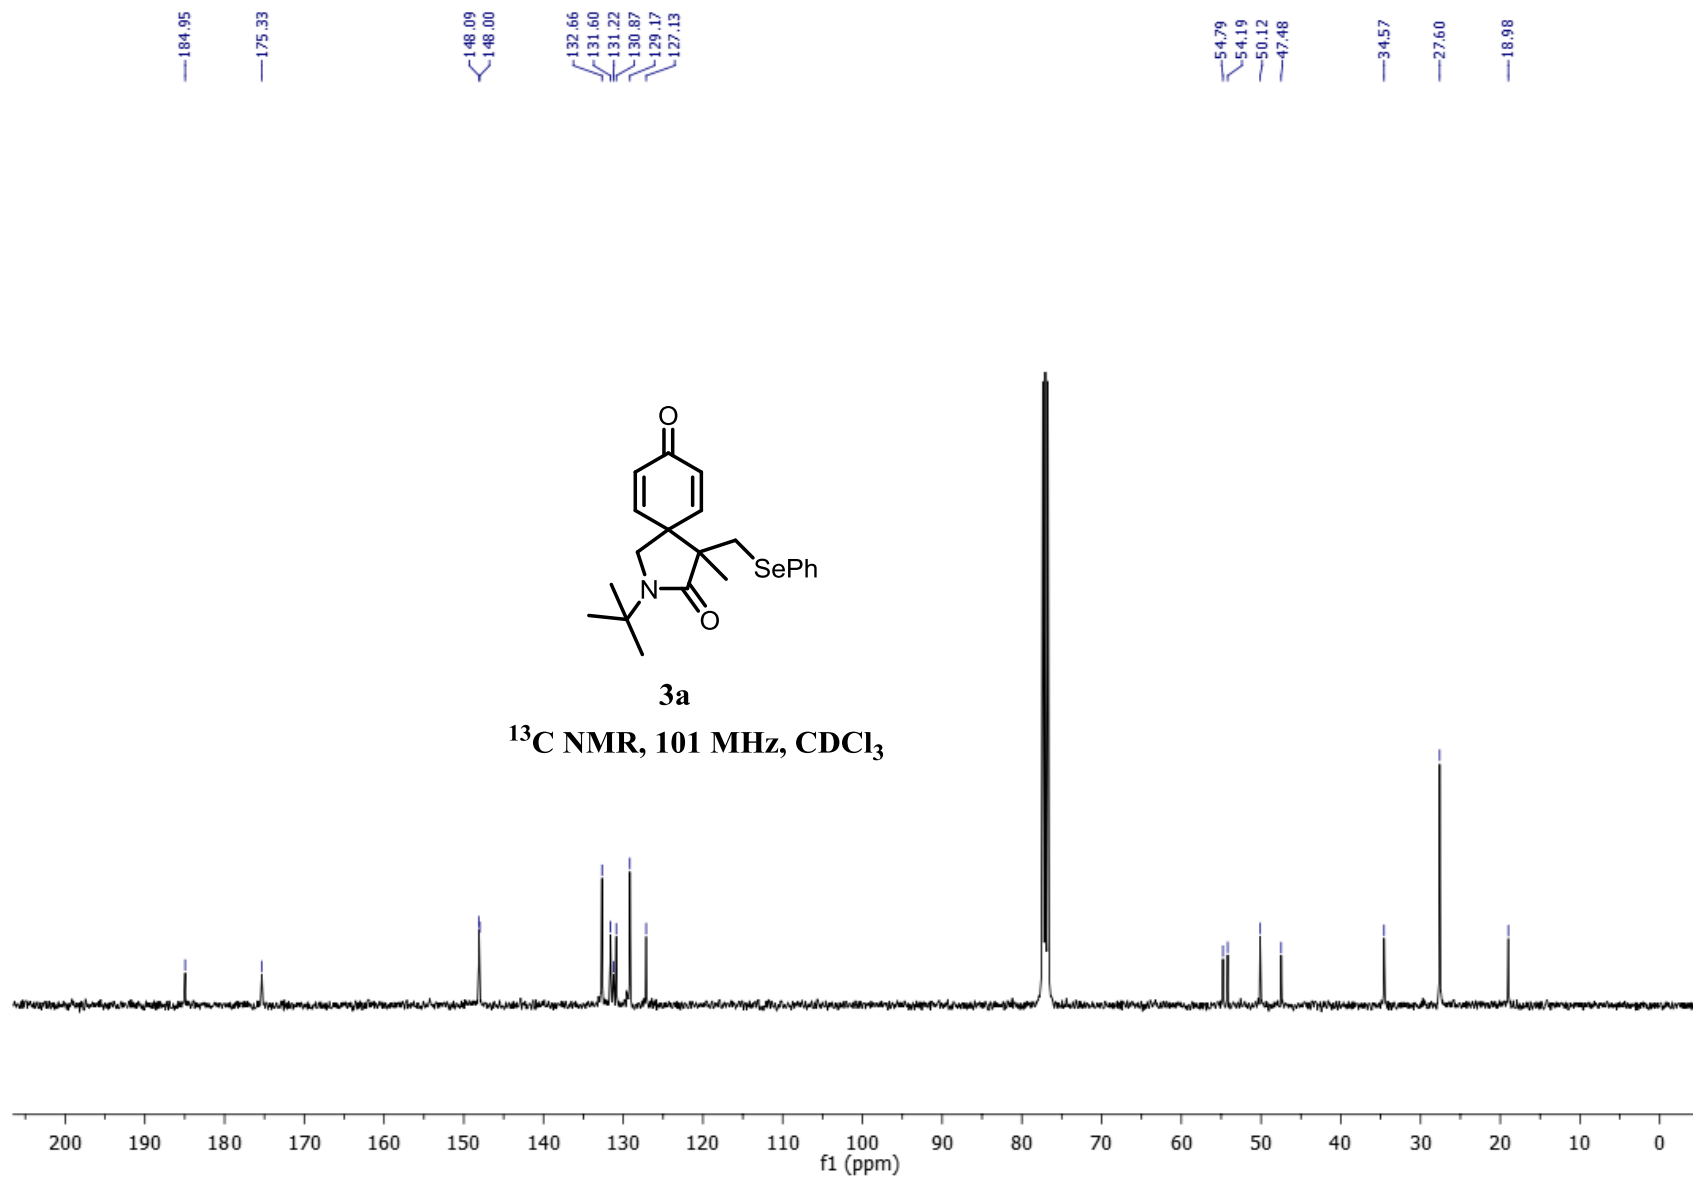

—248.54

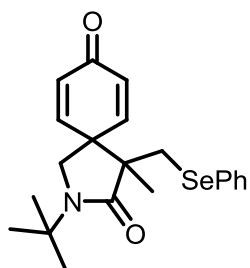

**3a**

<sup>77</sup>Se NMR, 76 MHz, CDCl<sub>3</sub>

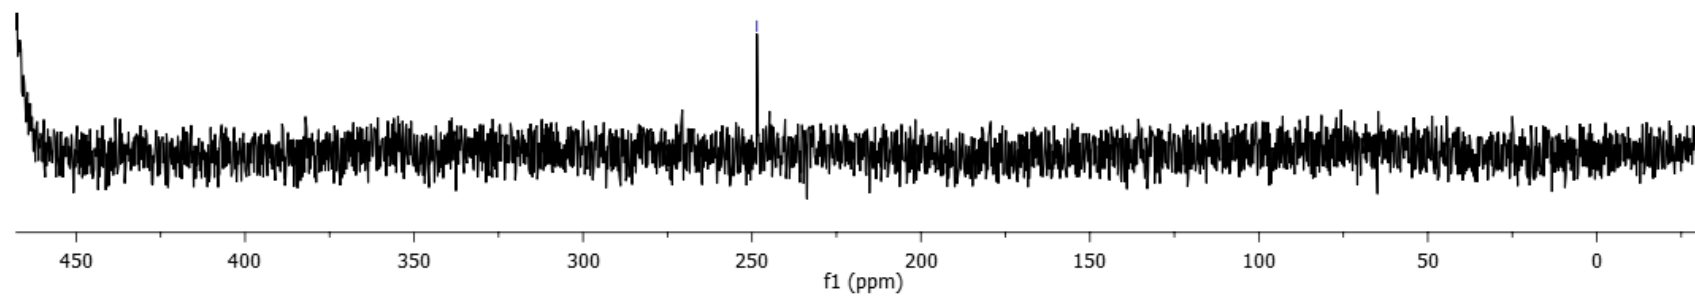



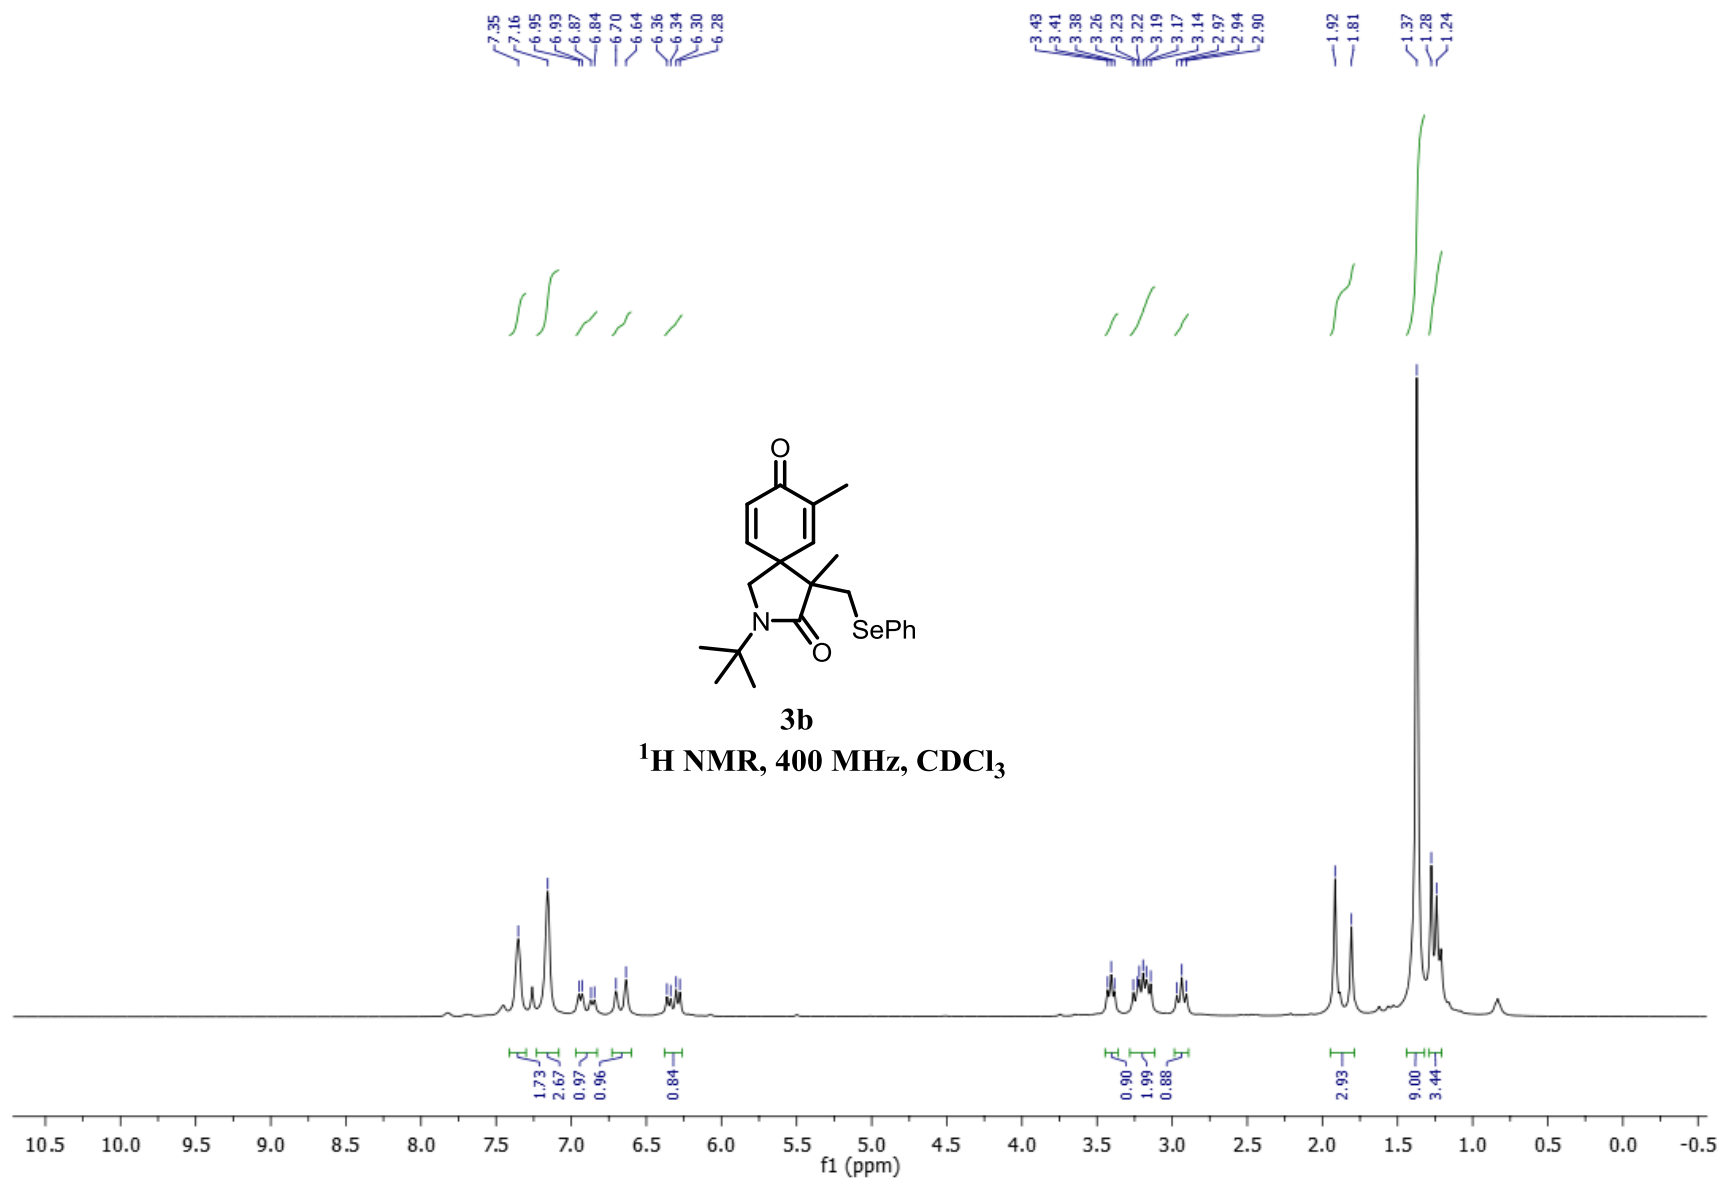

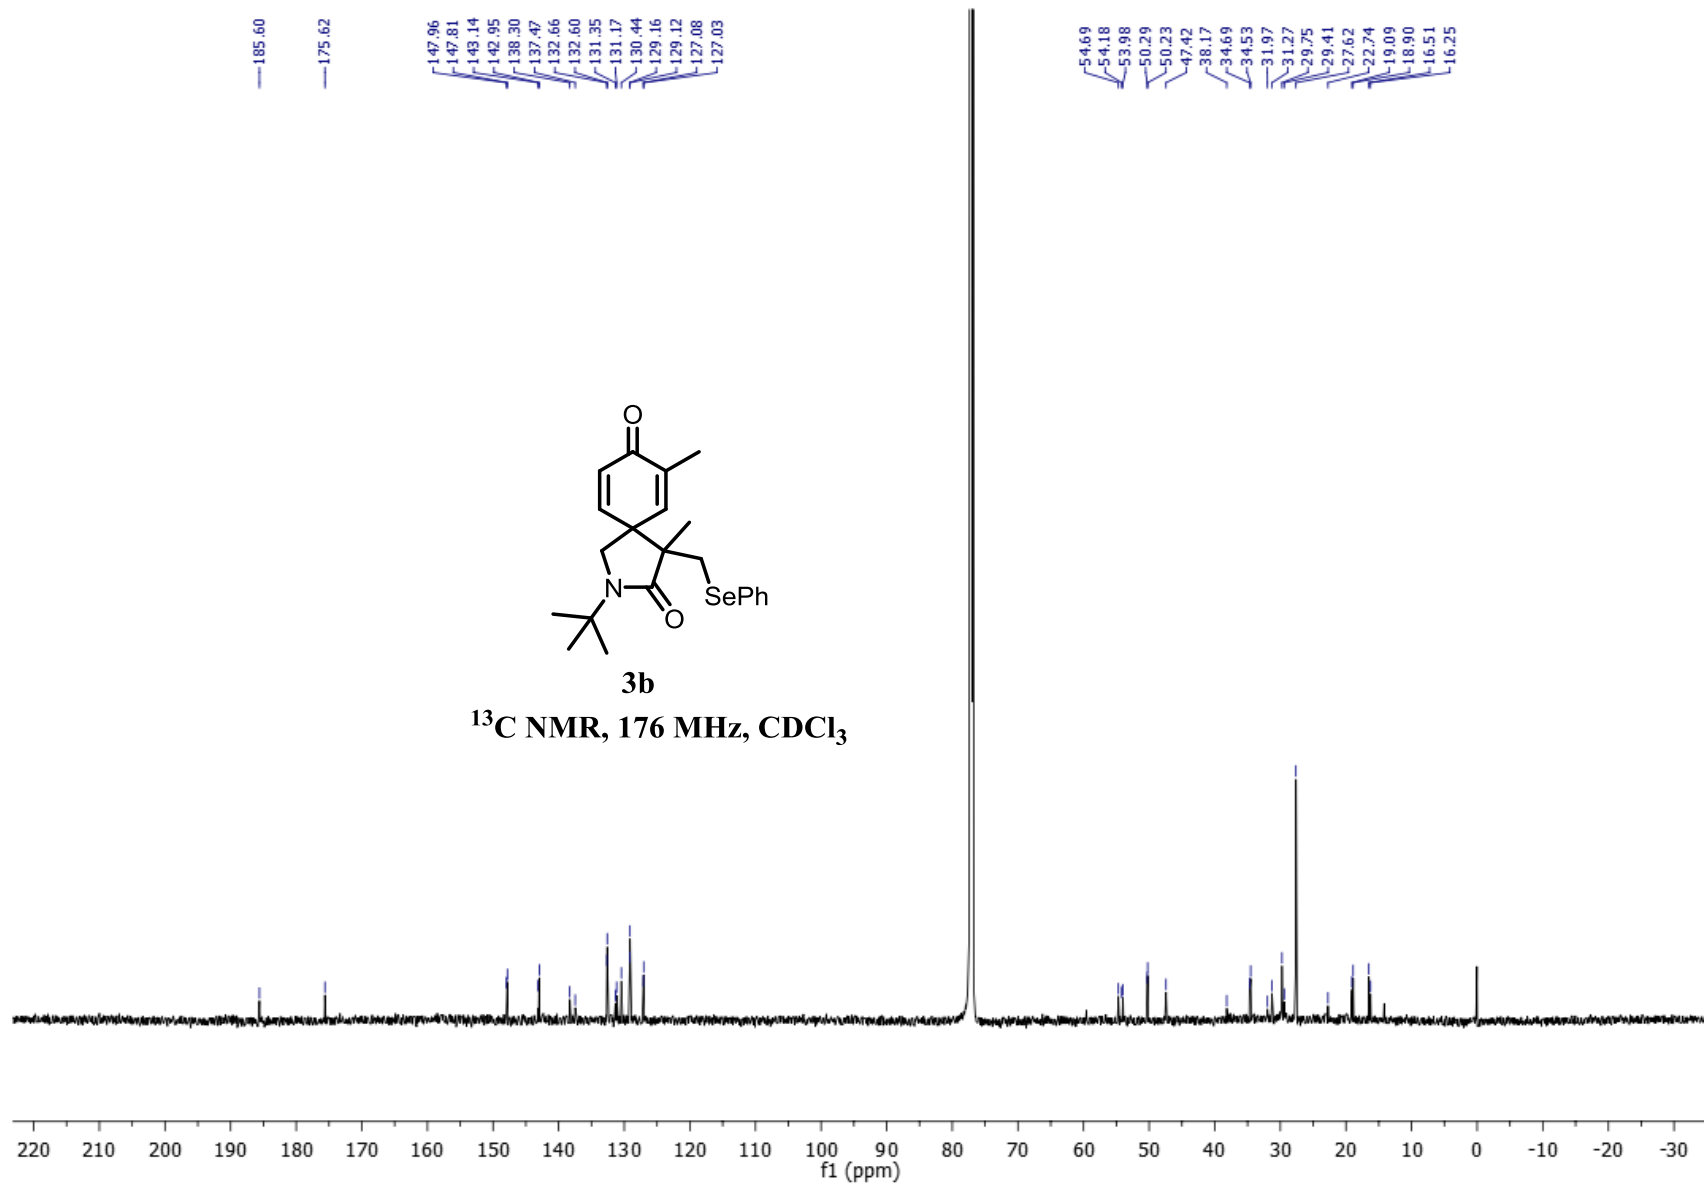

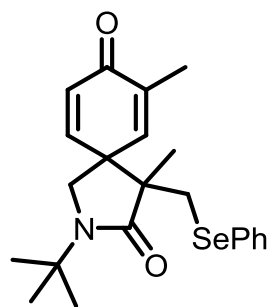

**3b**

$^{77}\text{Se}$  NMR, 76 MHz,  $\text{CDCl}_3$

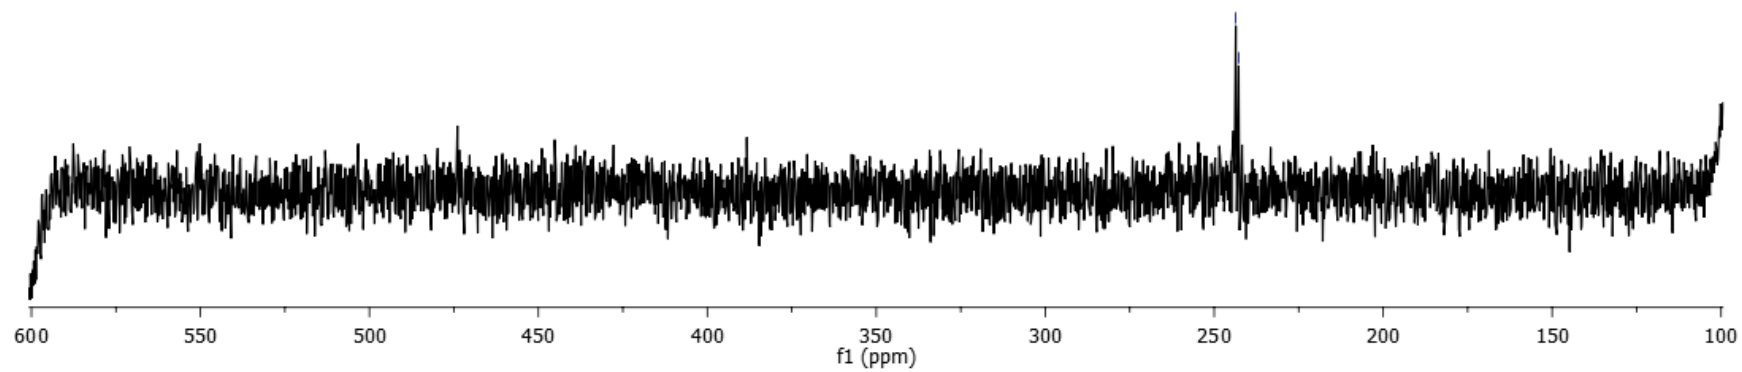

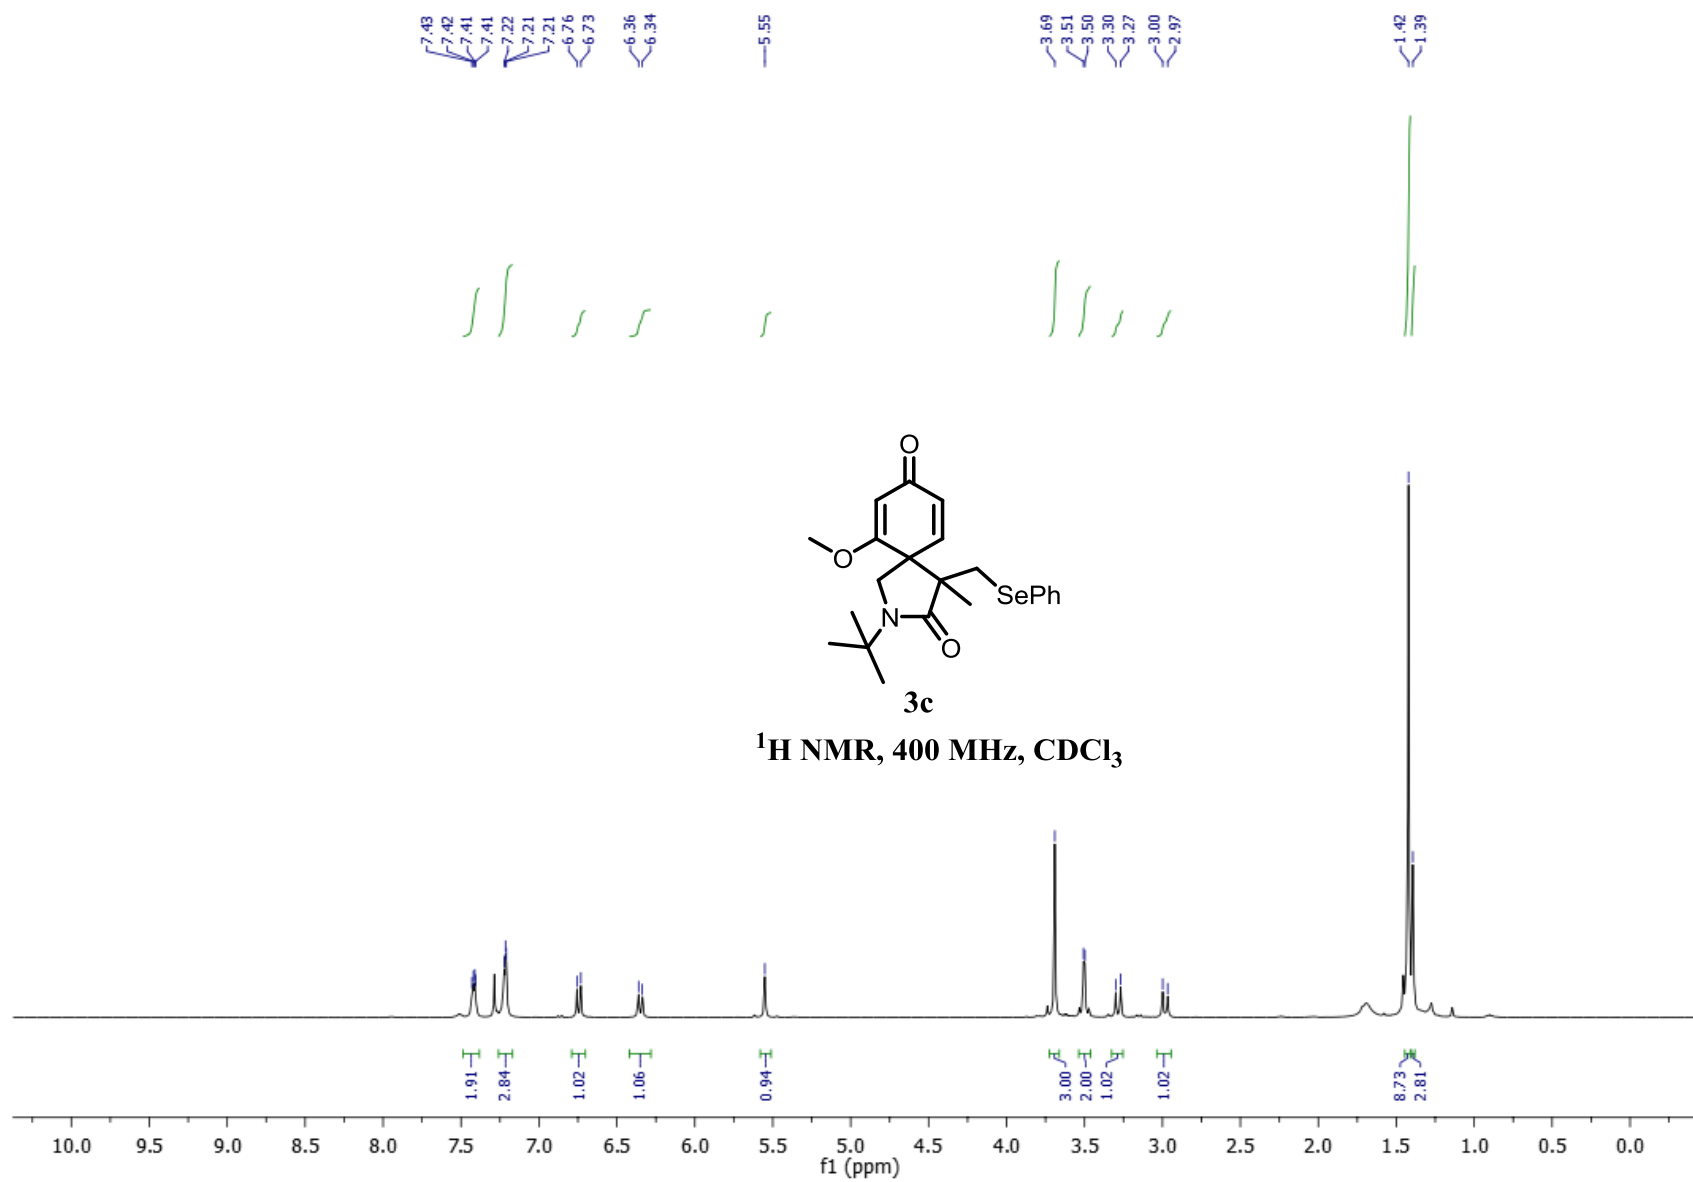

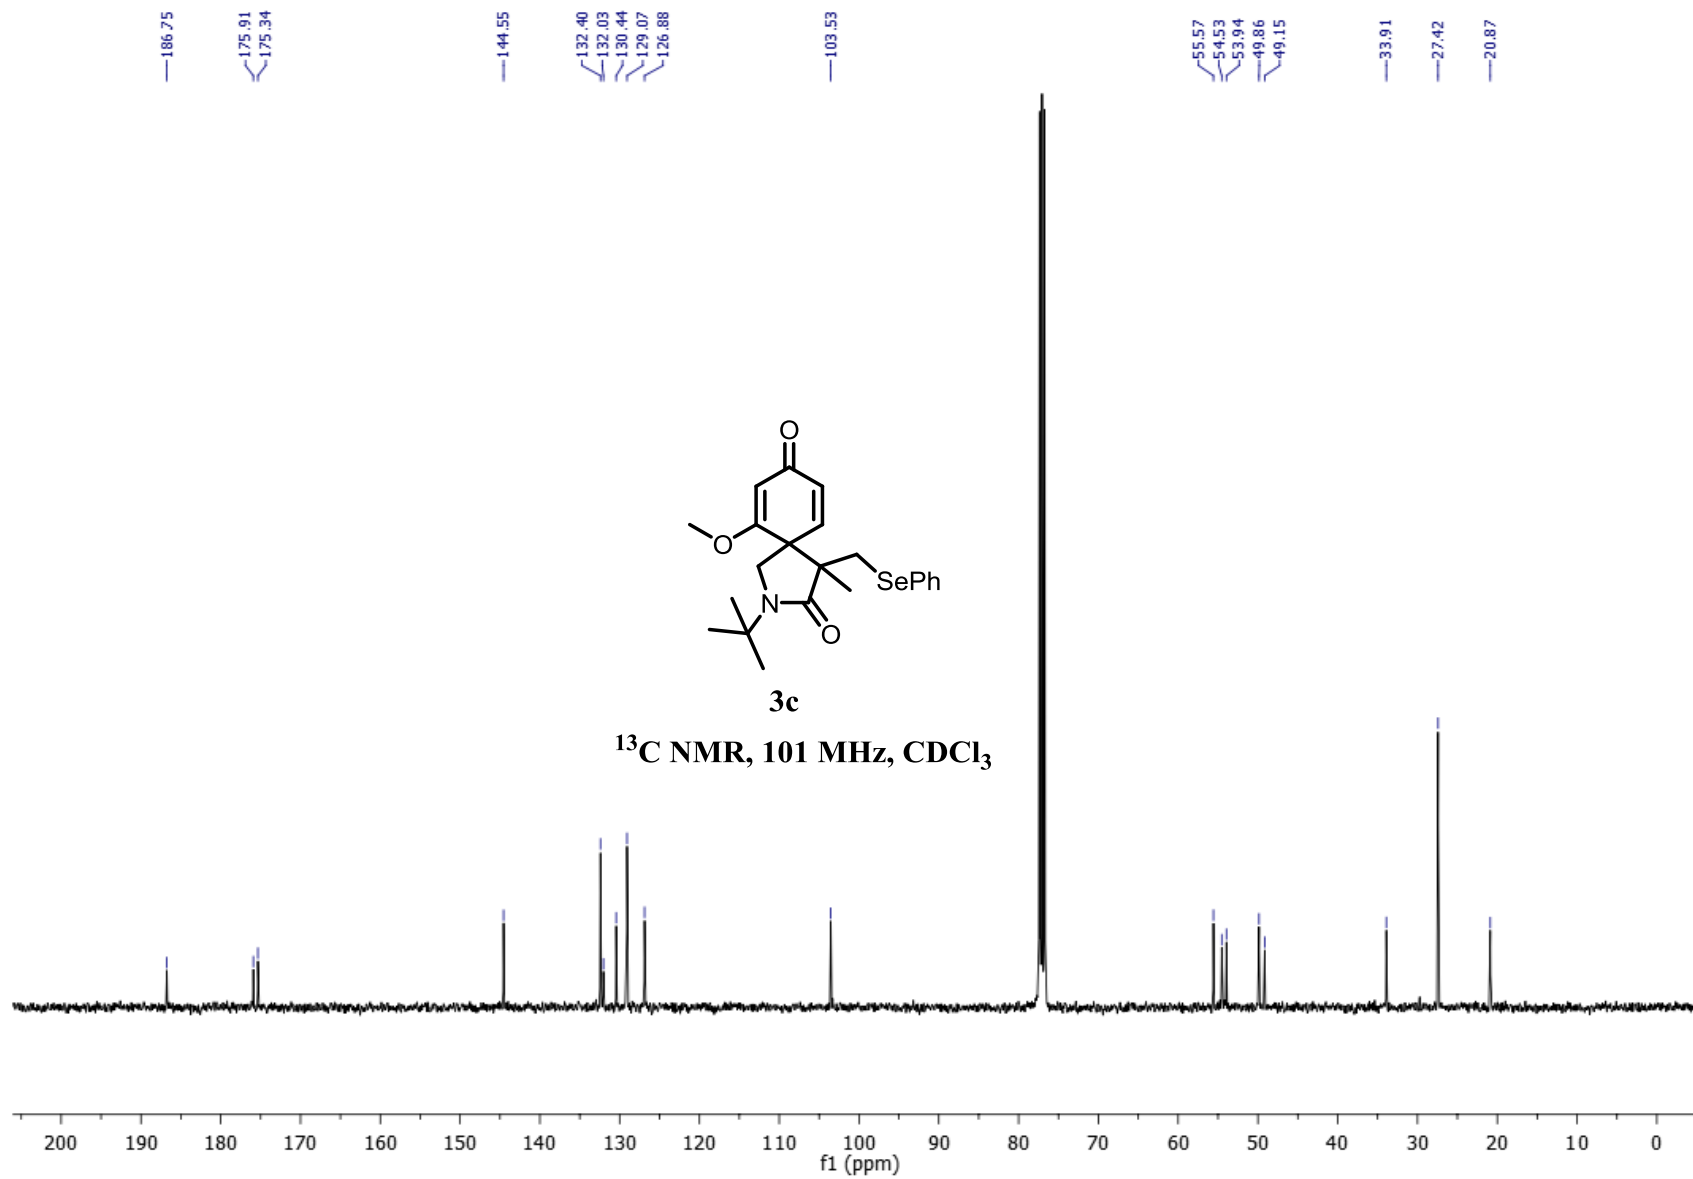

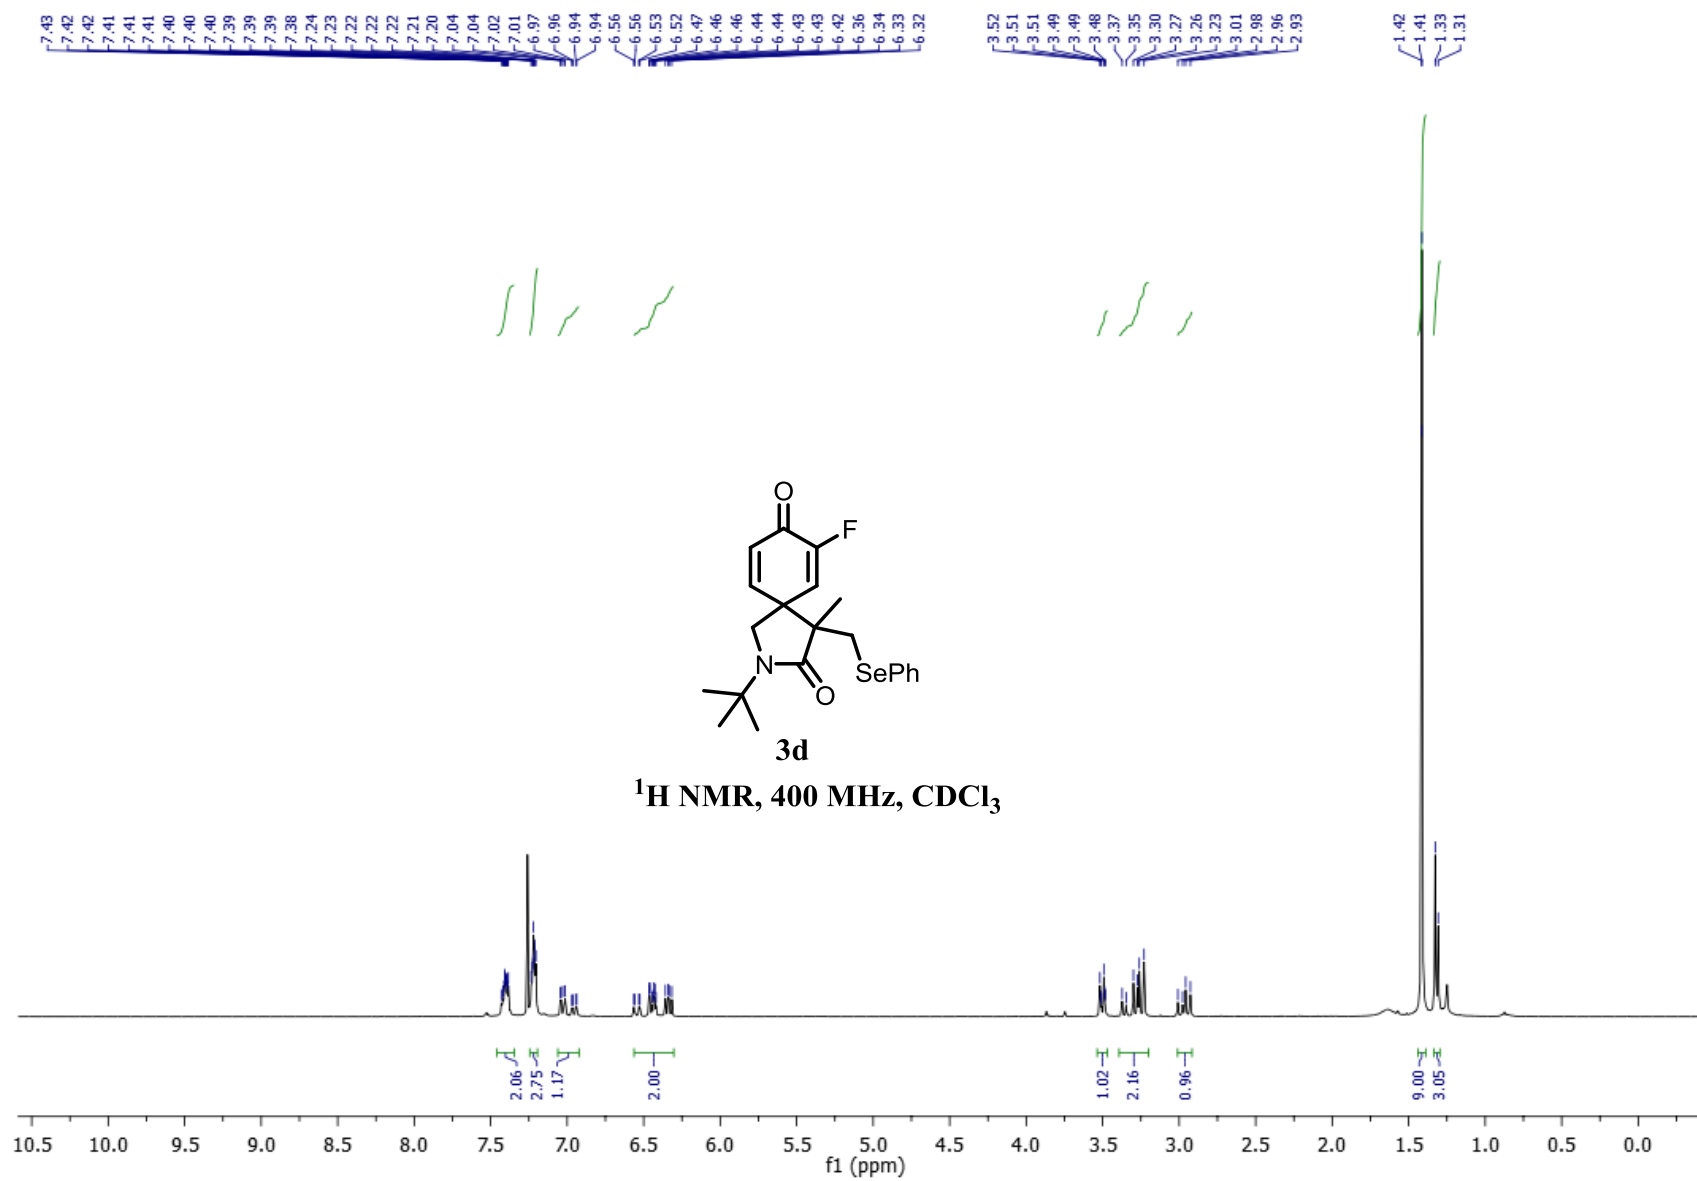

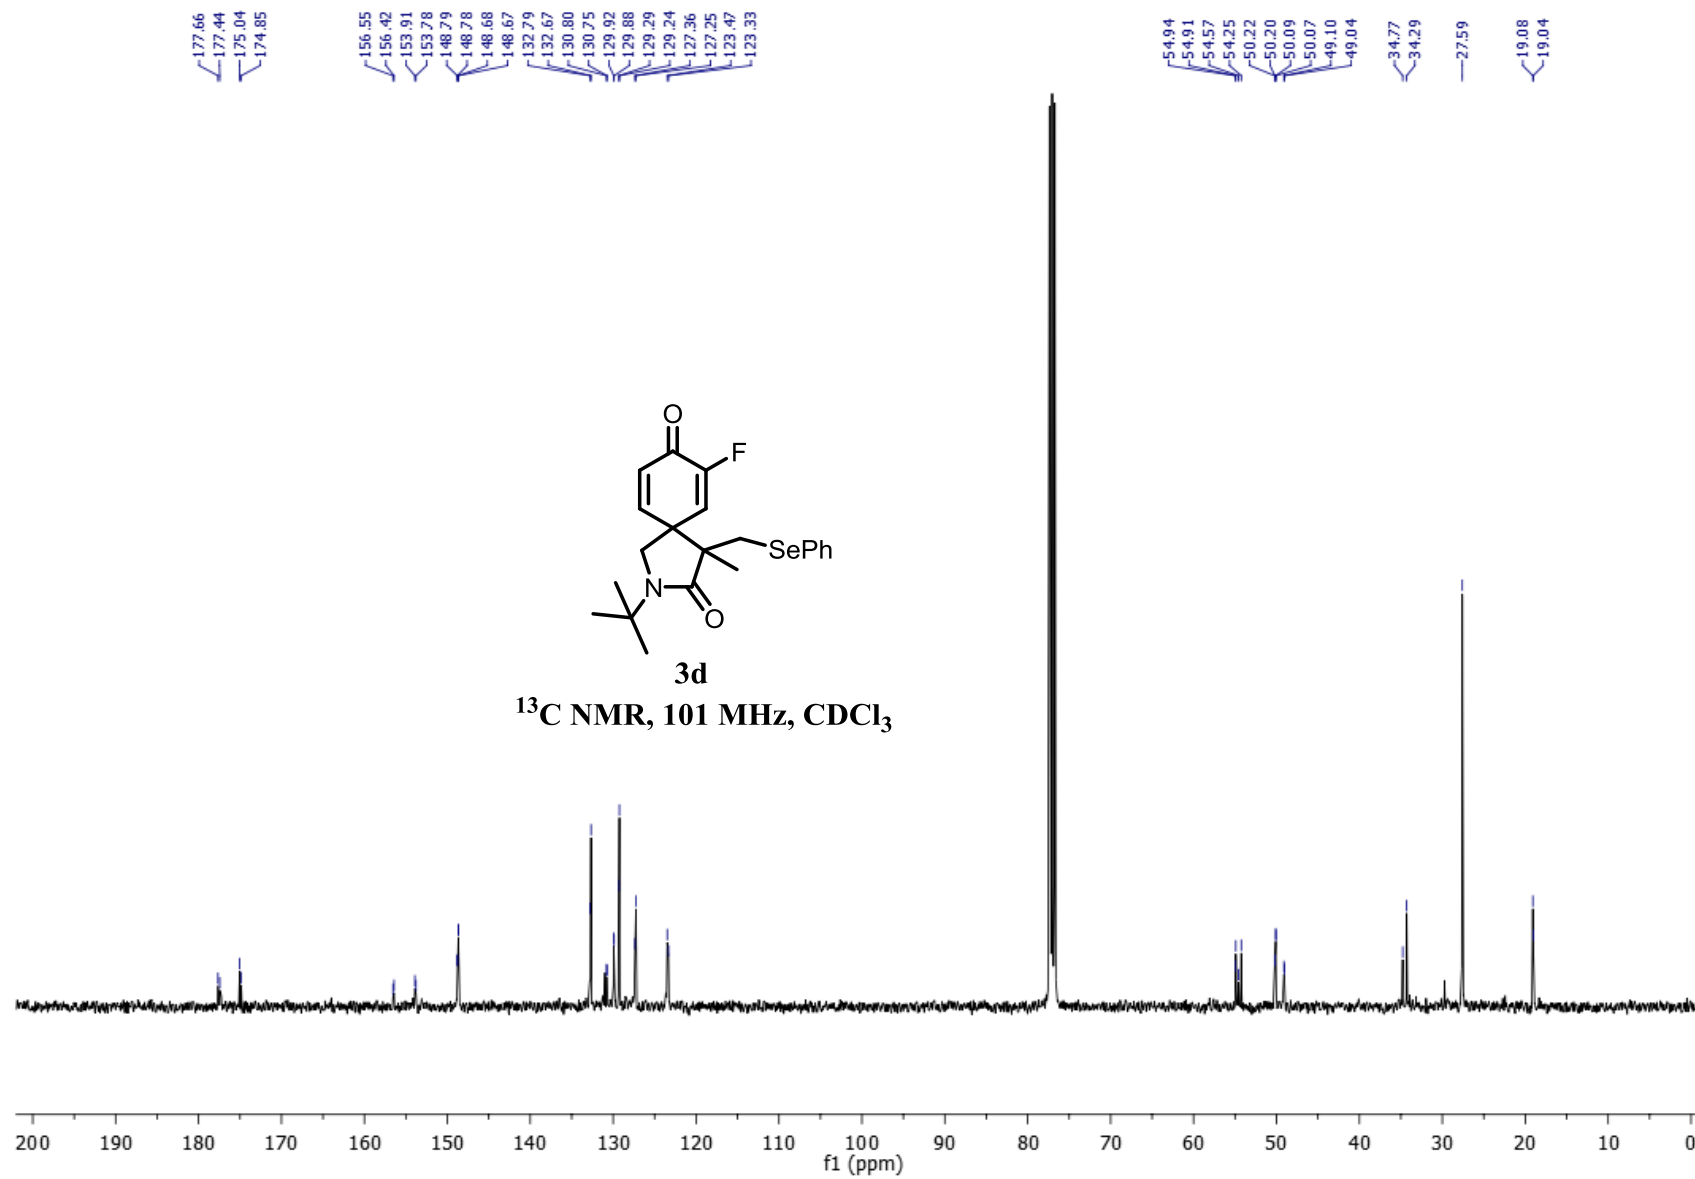

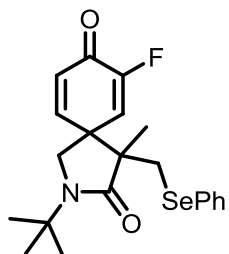

3d

<sup>19</sup>F NMR, 376 MHz, CDCl<sub>3</sub>

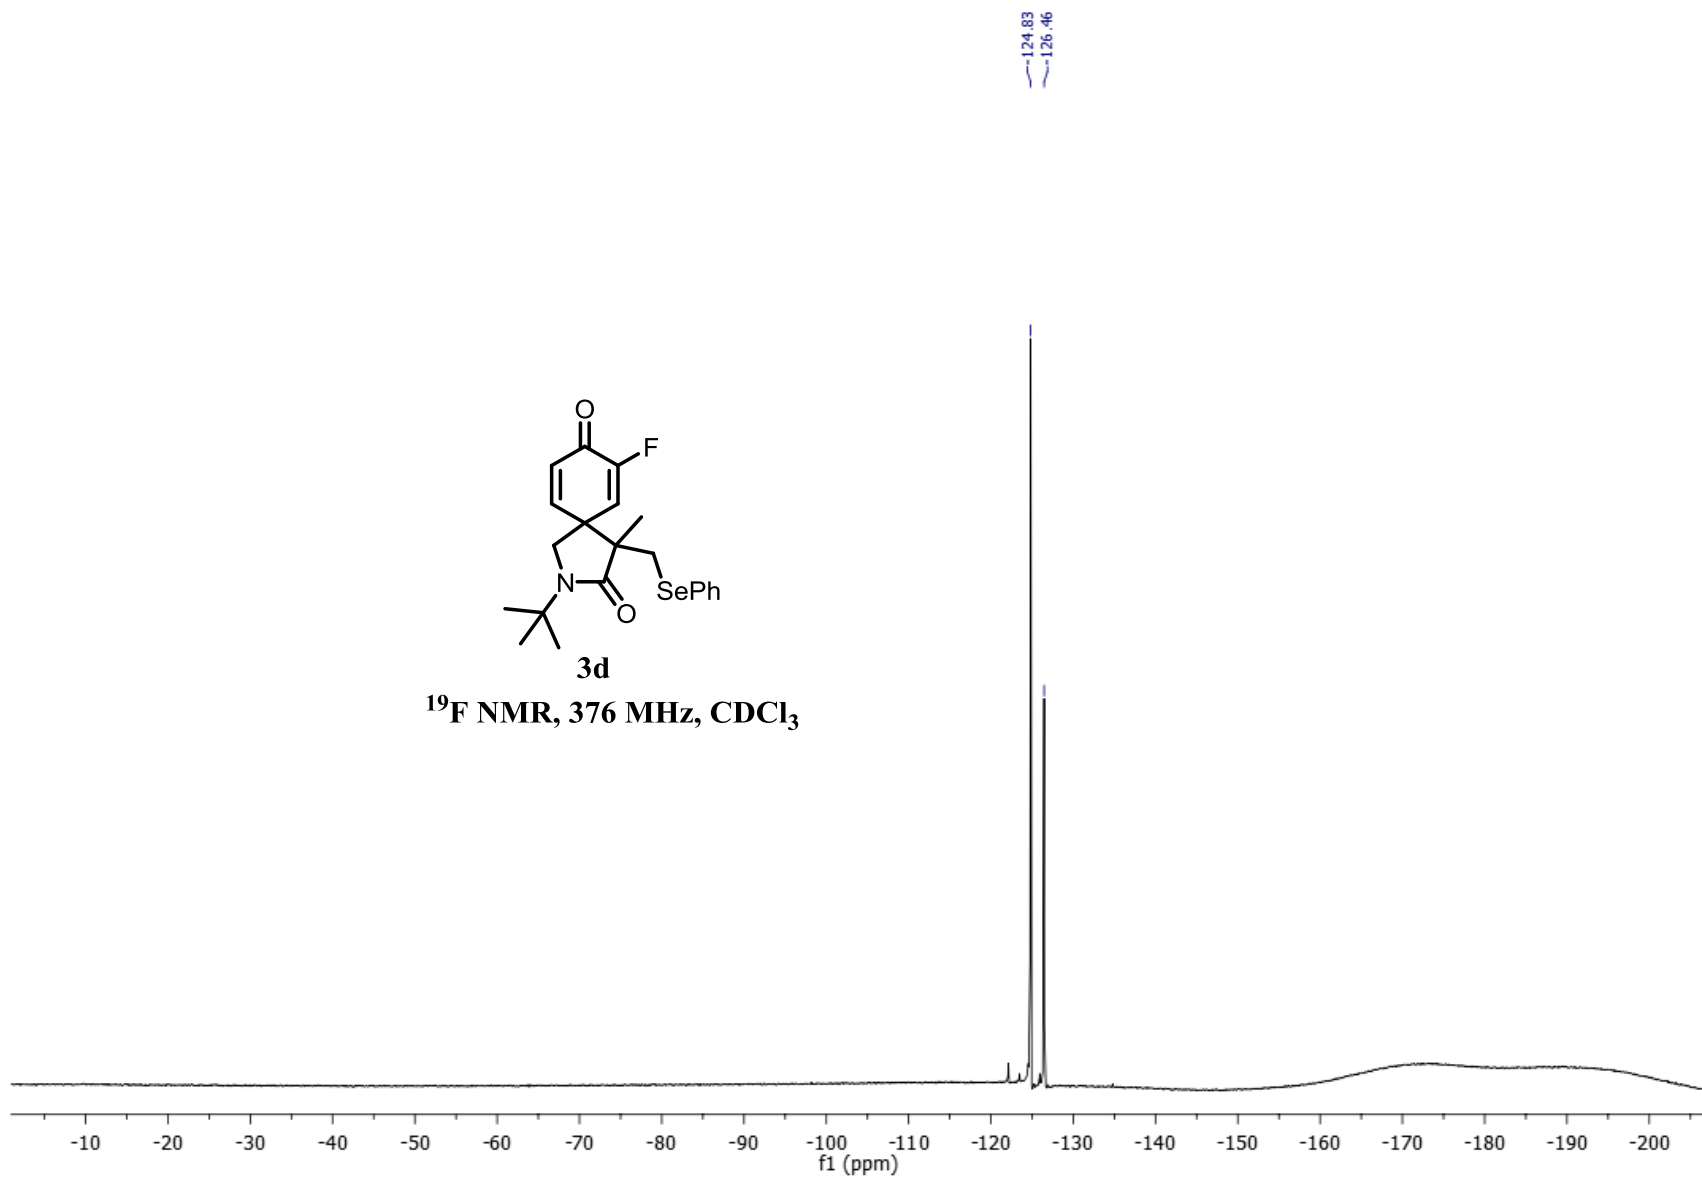



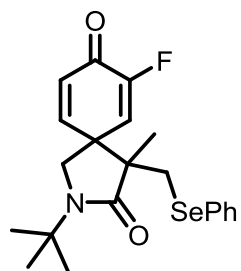

3d

$^{77}\text{Se}$  NMR, 76 MHz,  $\text{CDCl}_3$

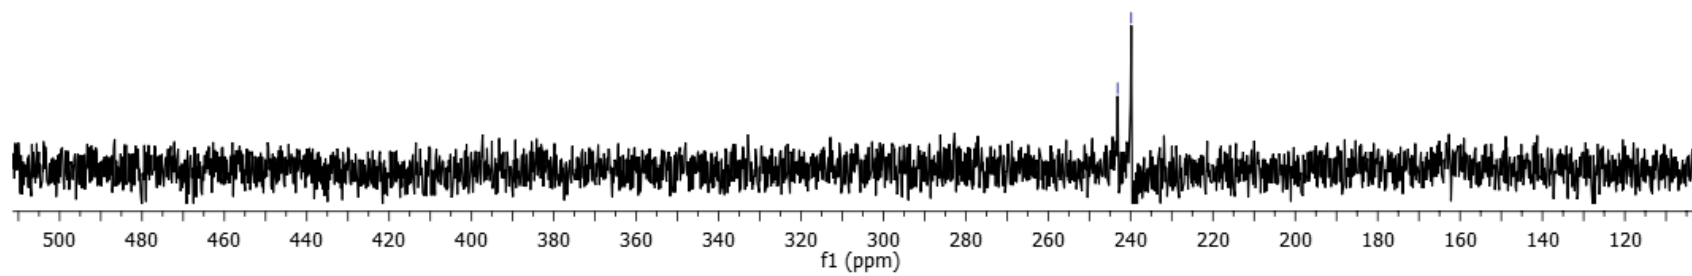

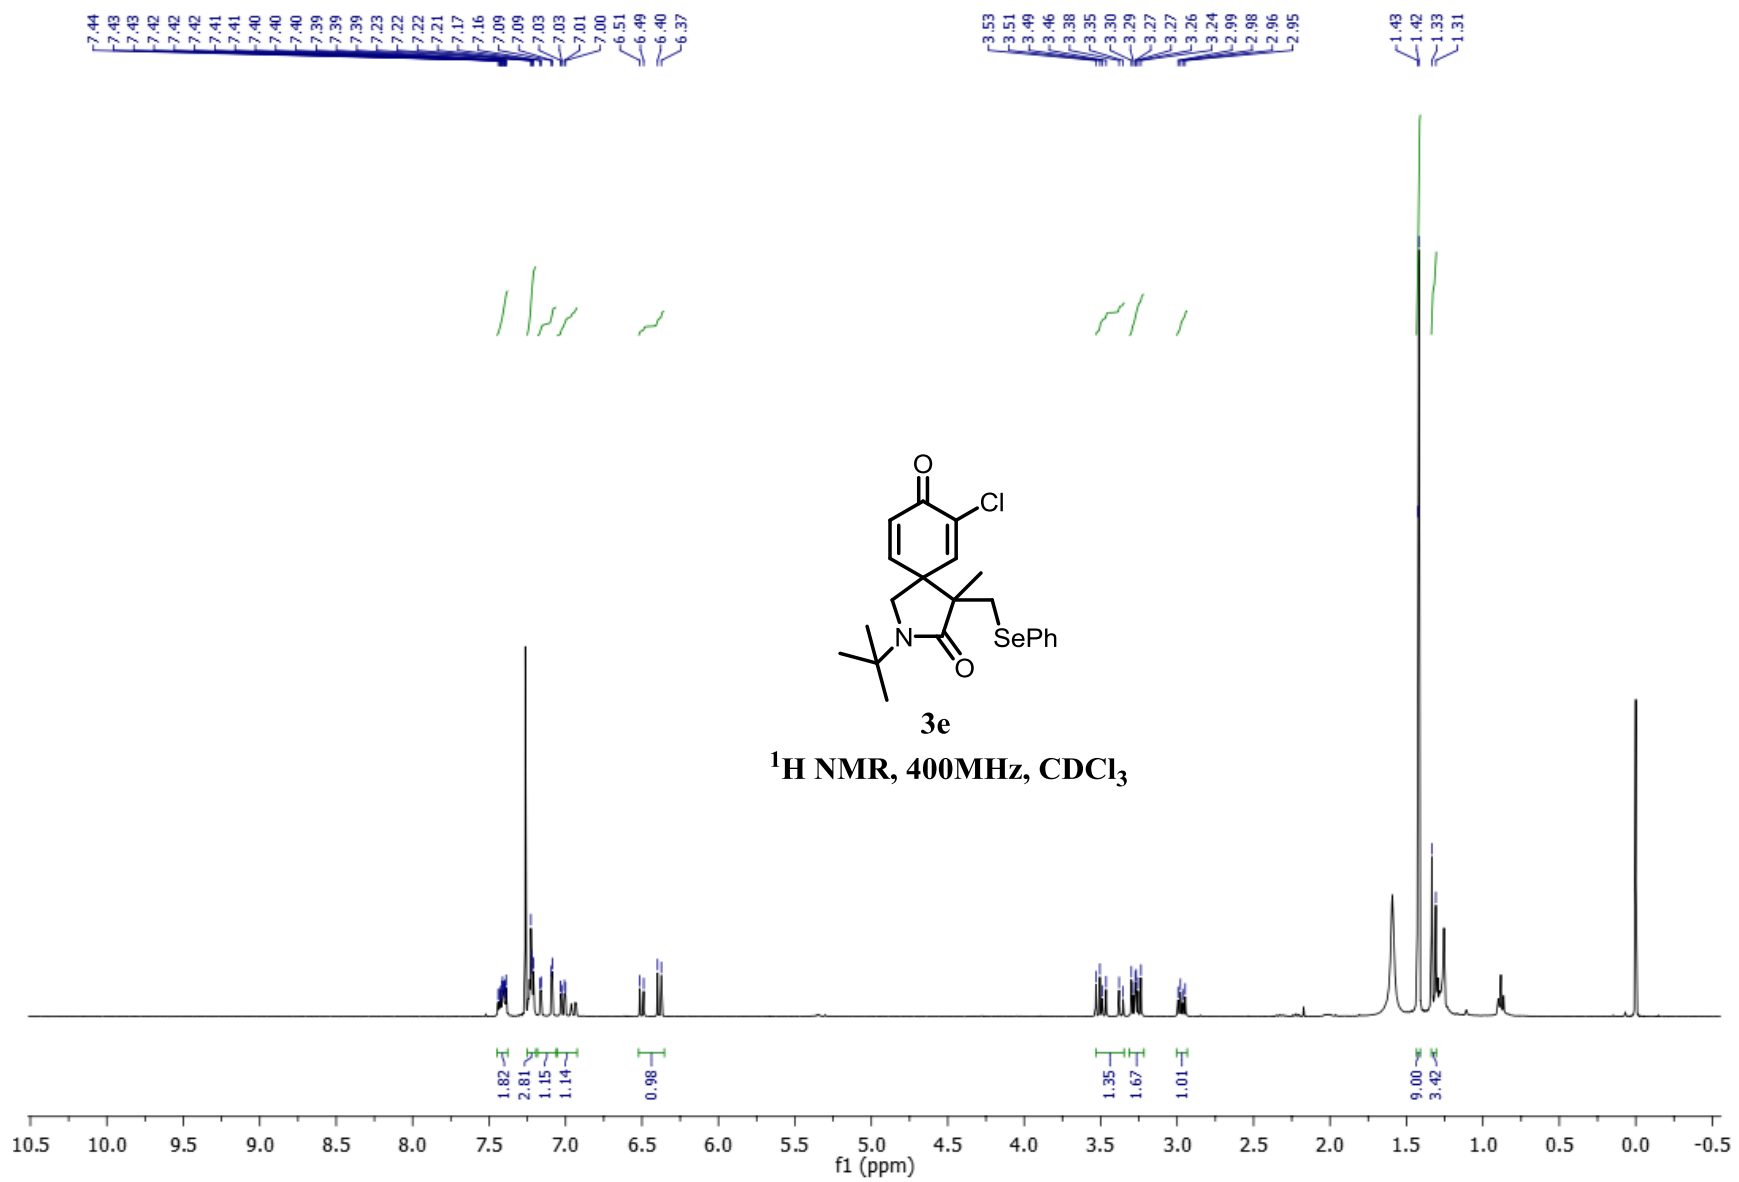

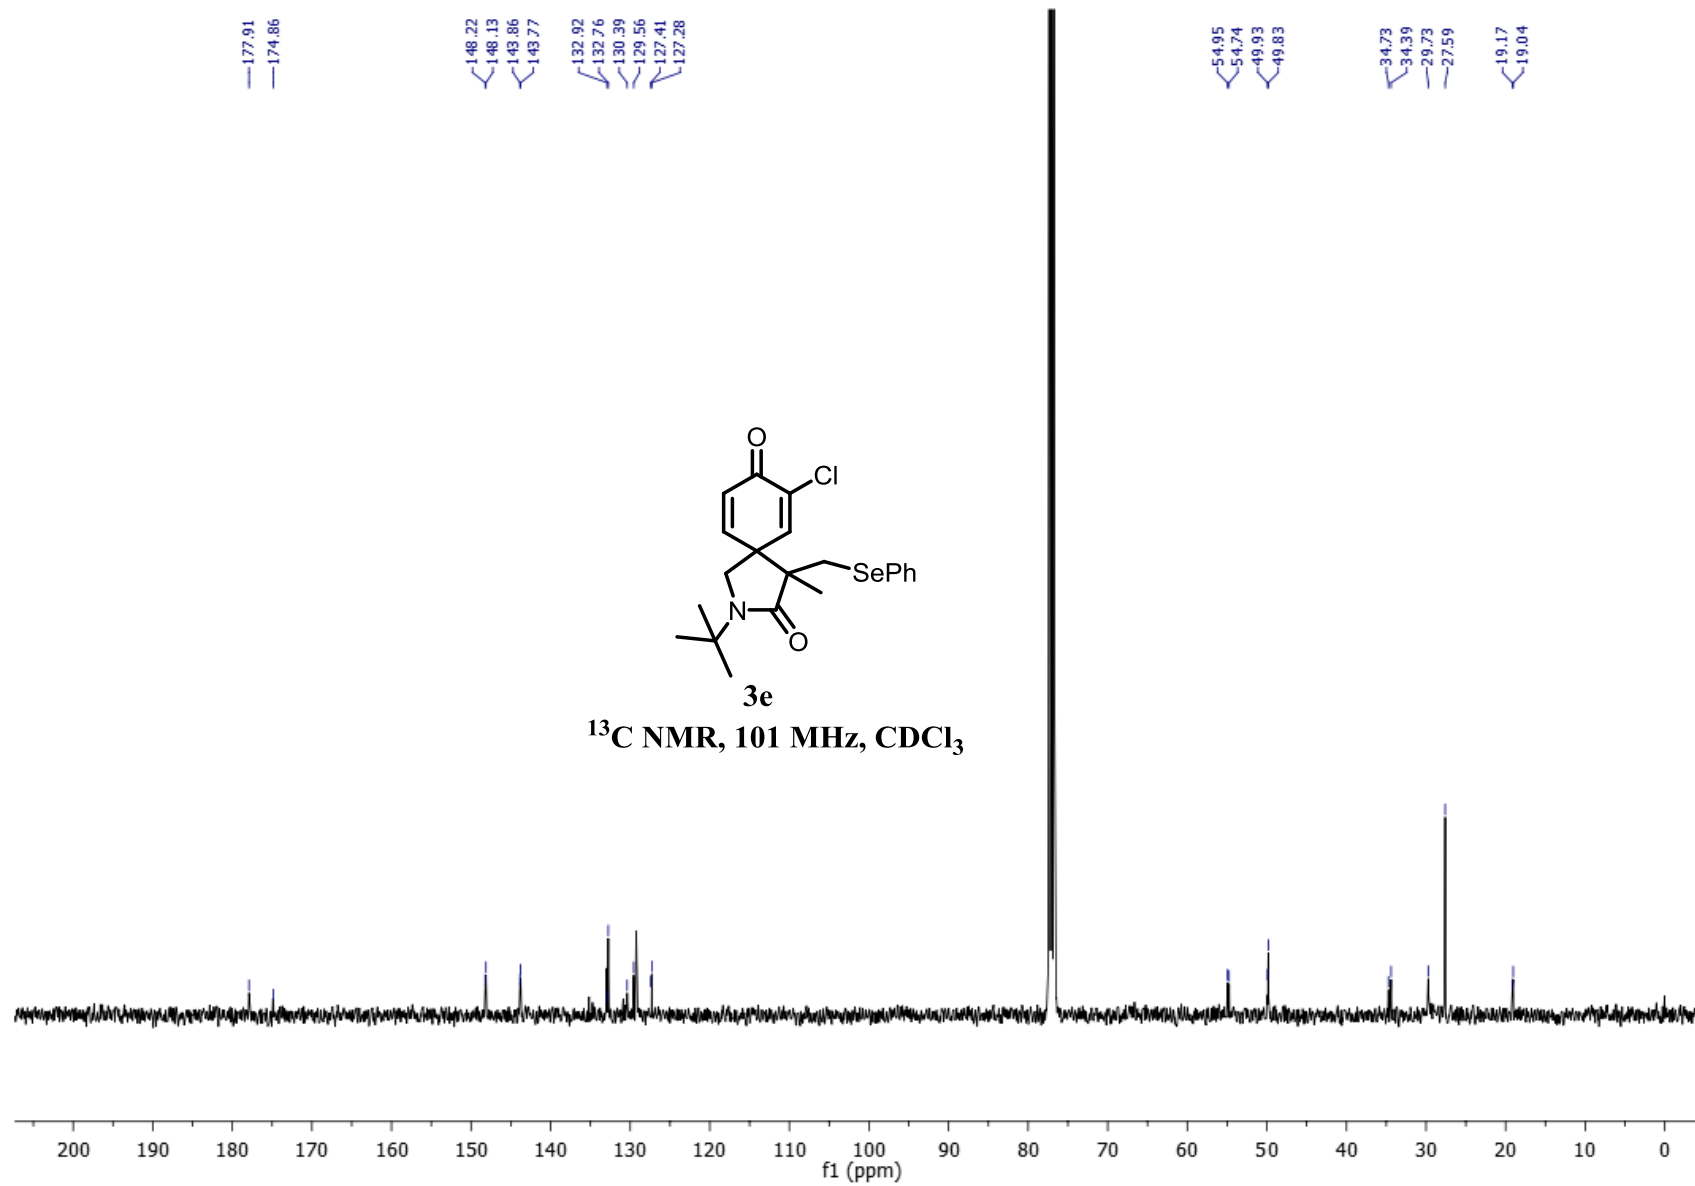

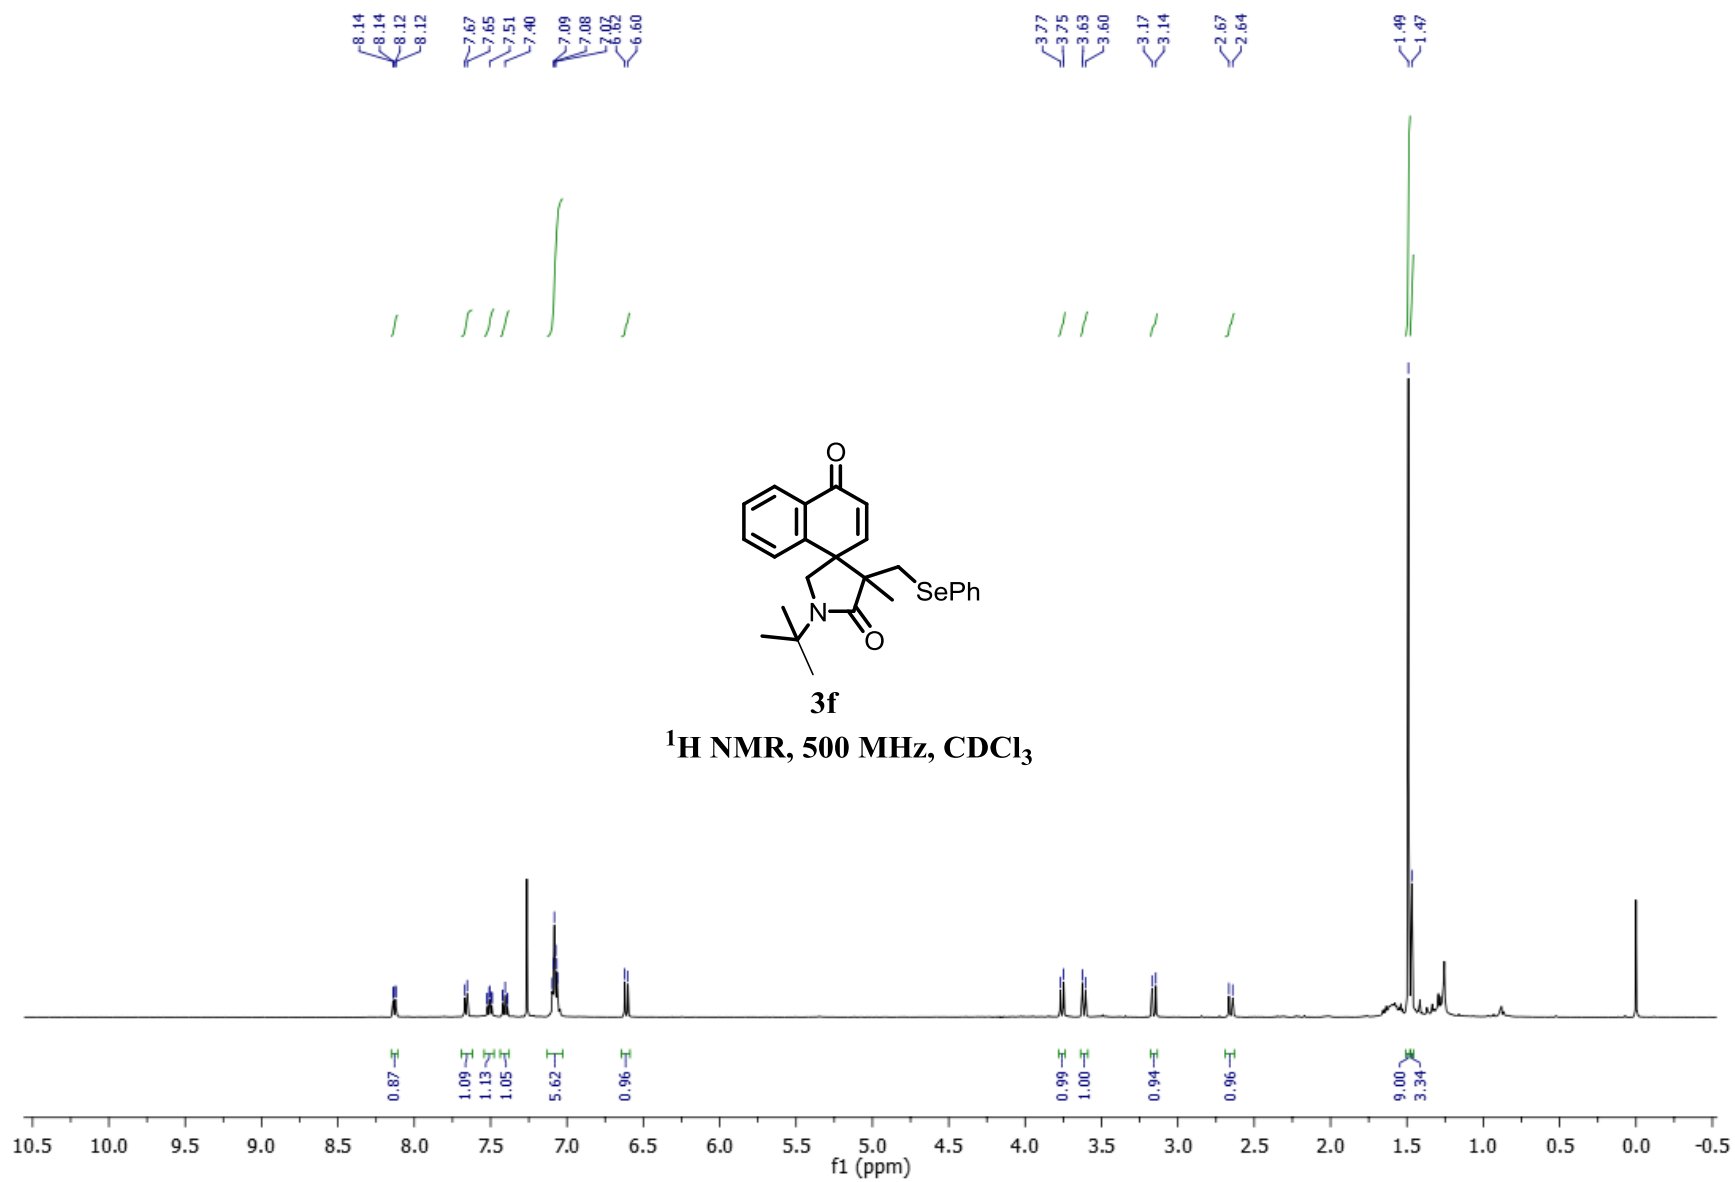

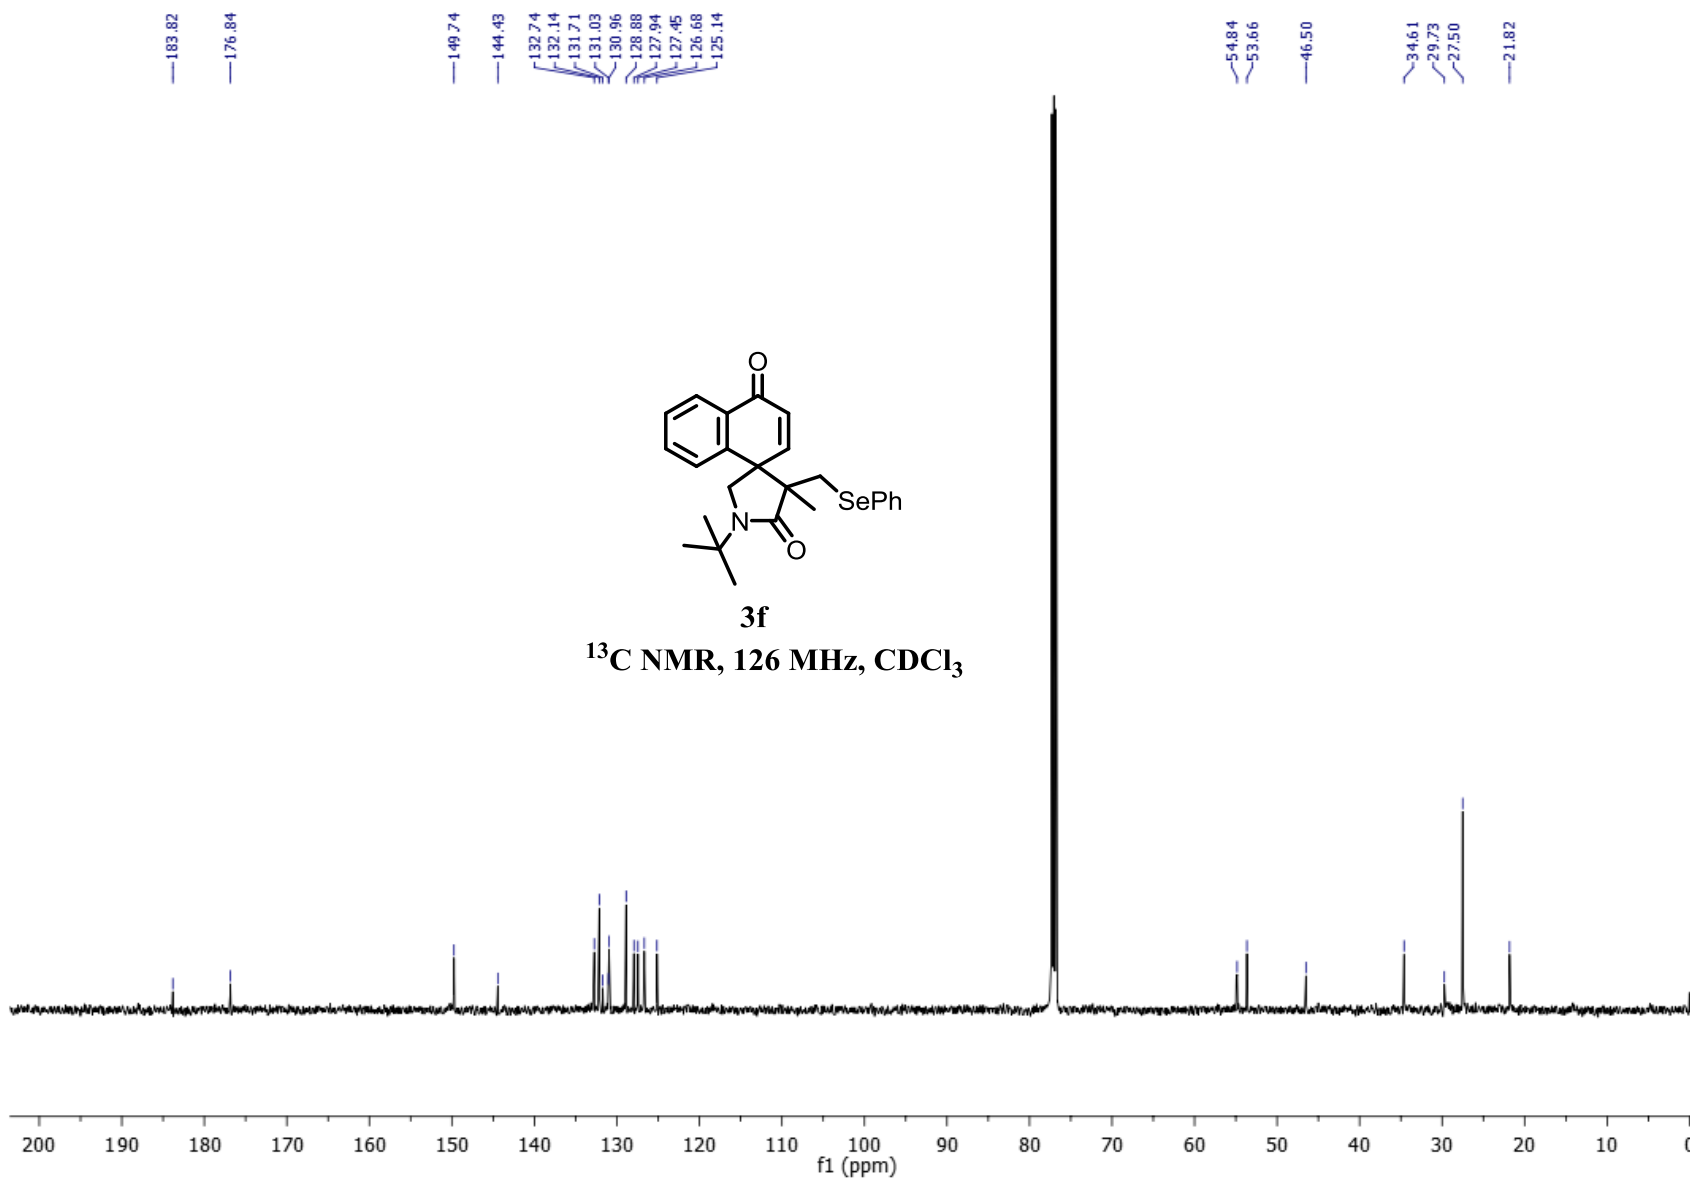

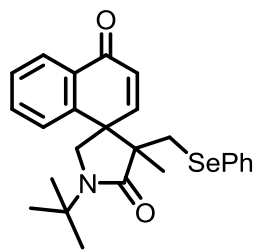

**3f**

<sup>77</sup>Se NMR, 76 MHz, CDCl<sub>3</sub>

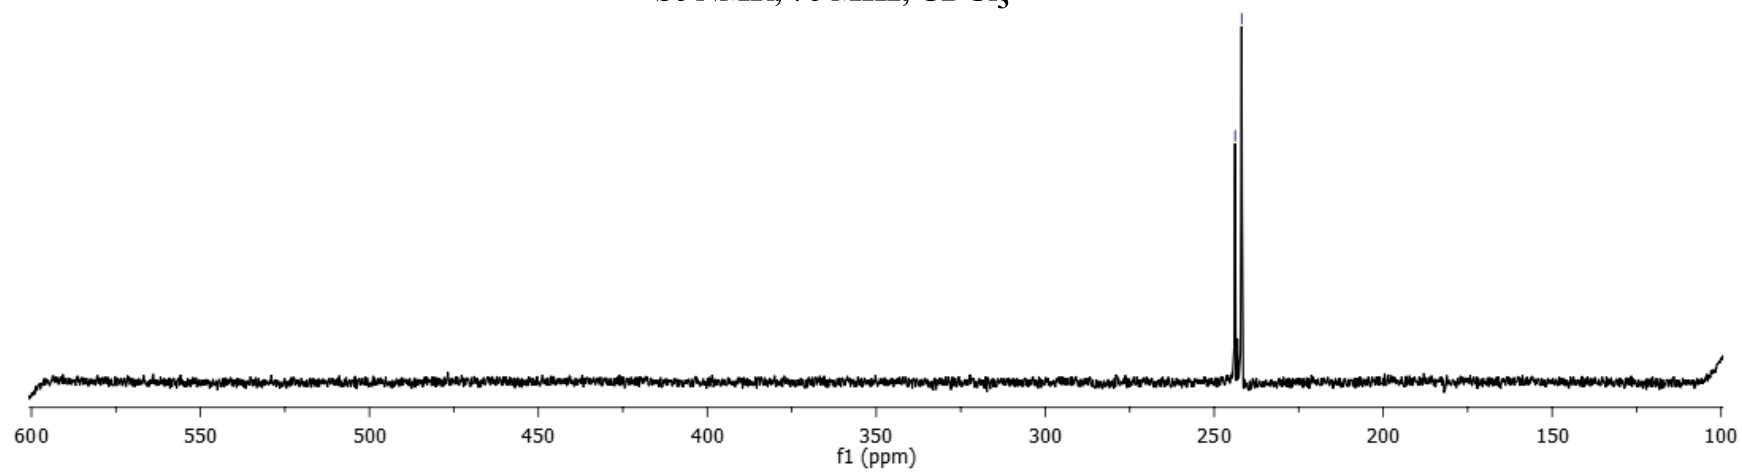

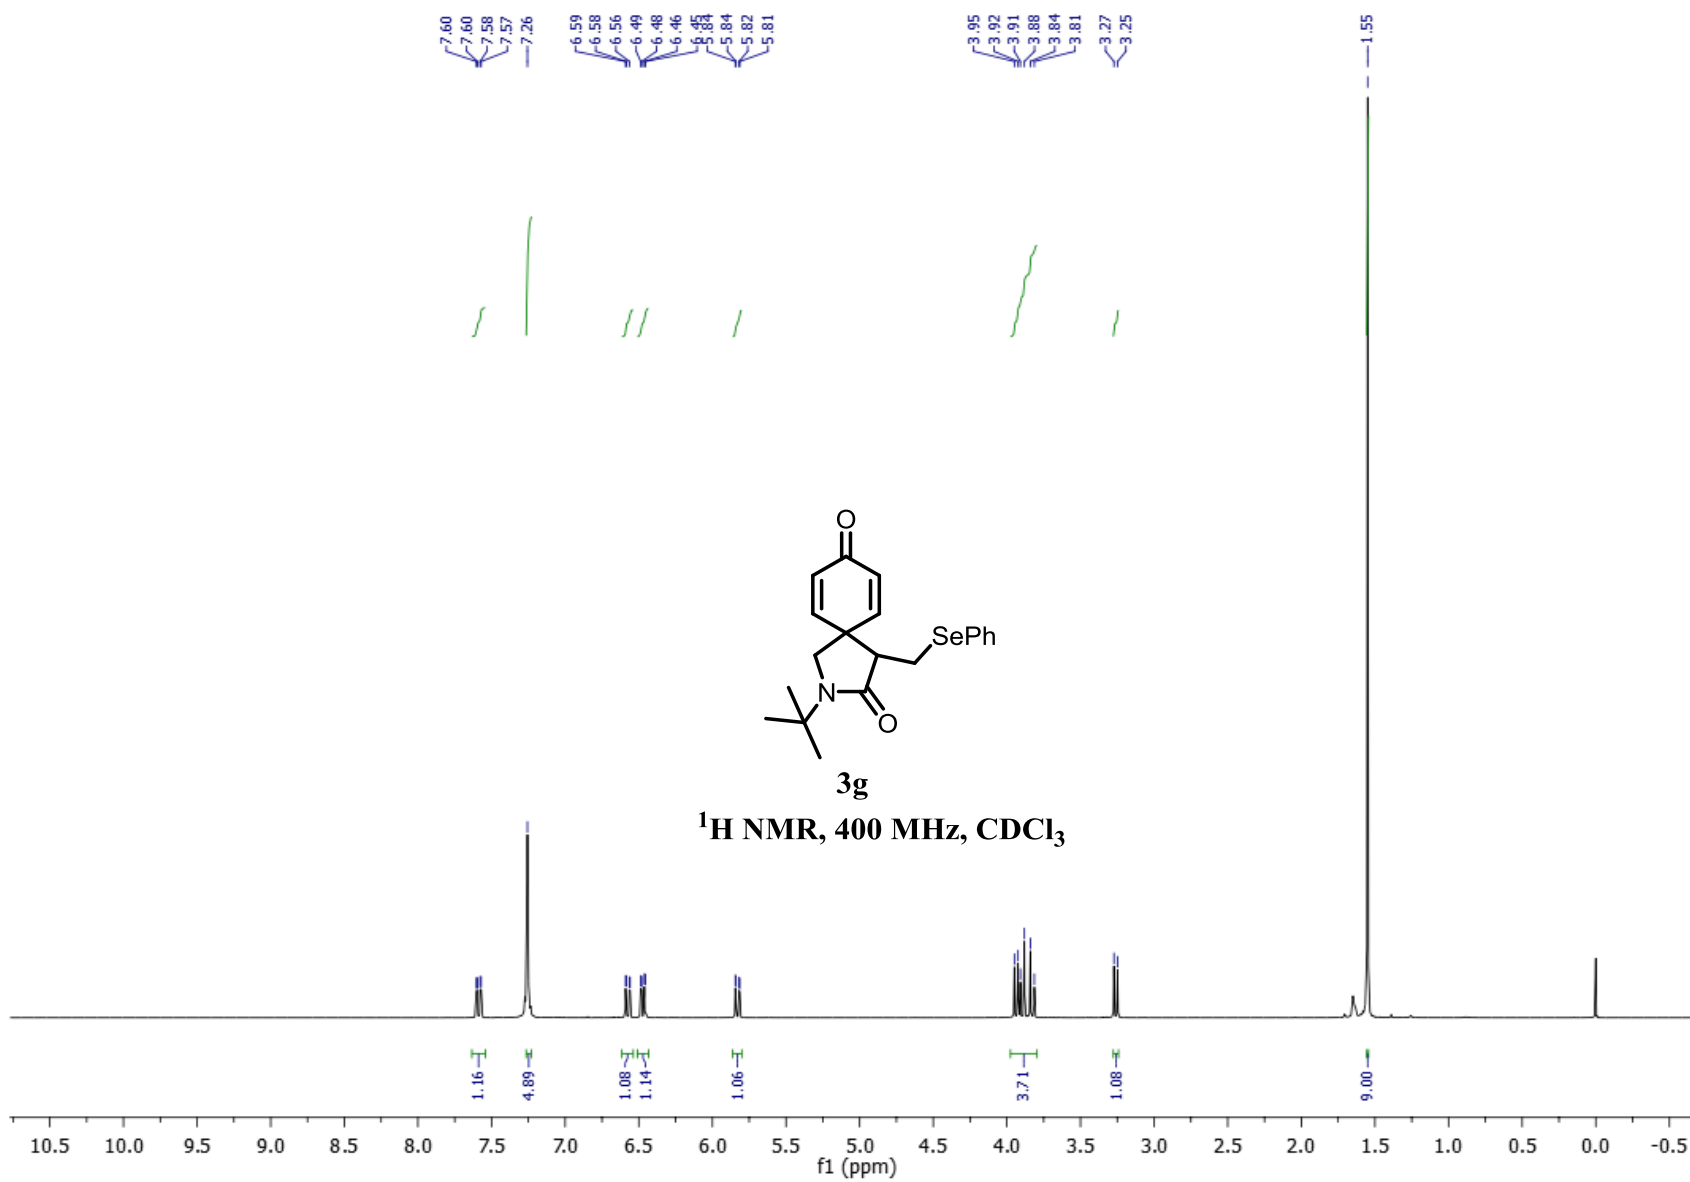

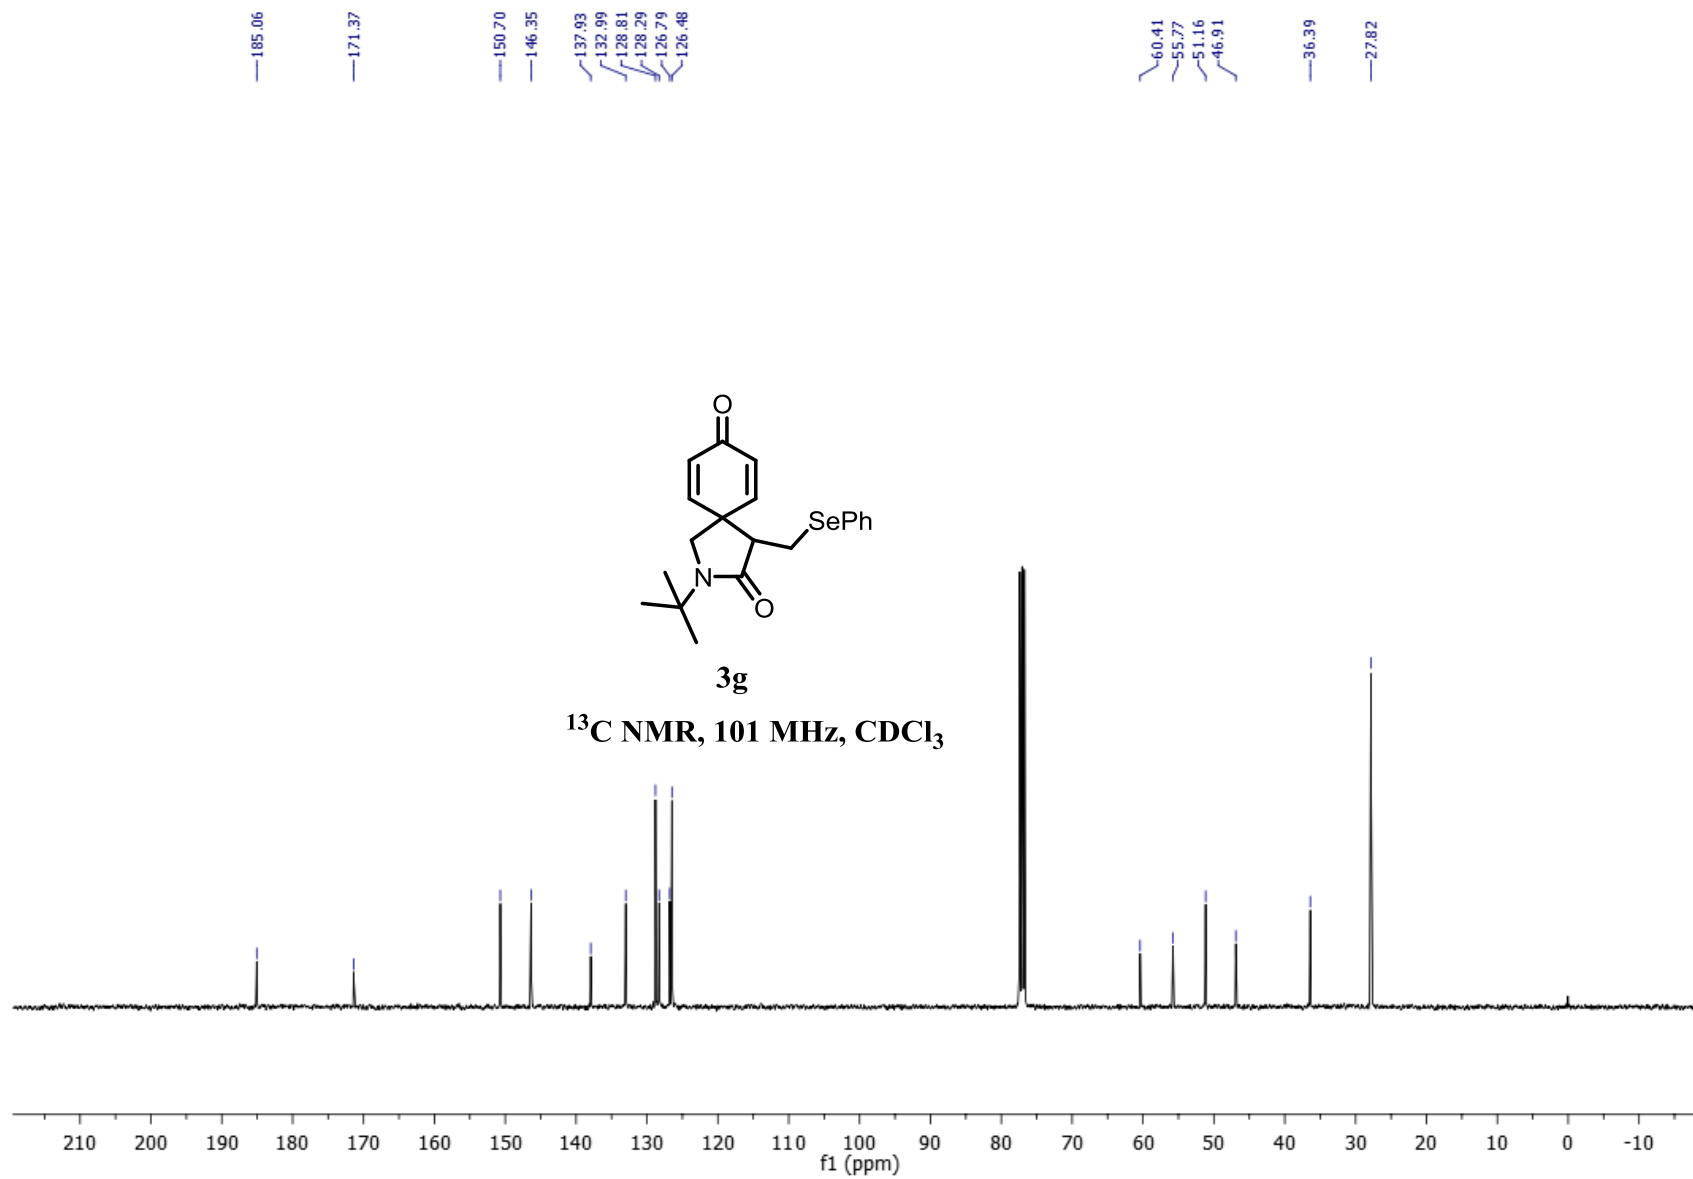



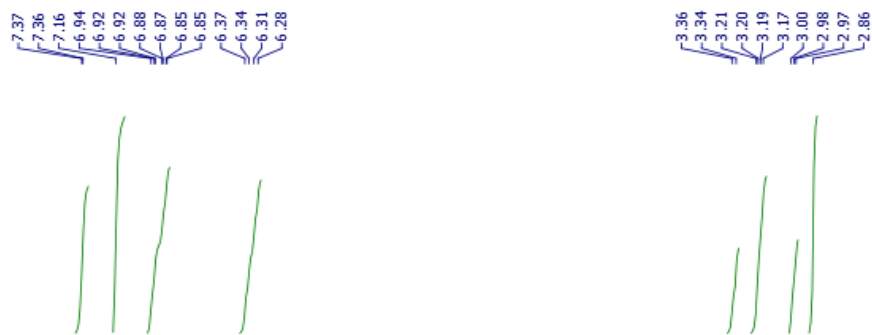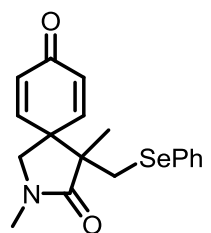

**3h**

**$^1\text{H}$  NMR, 400 MHz,  $\text{CDCl}_3$**

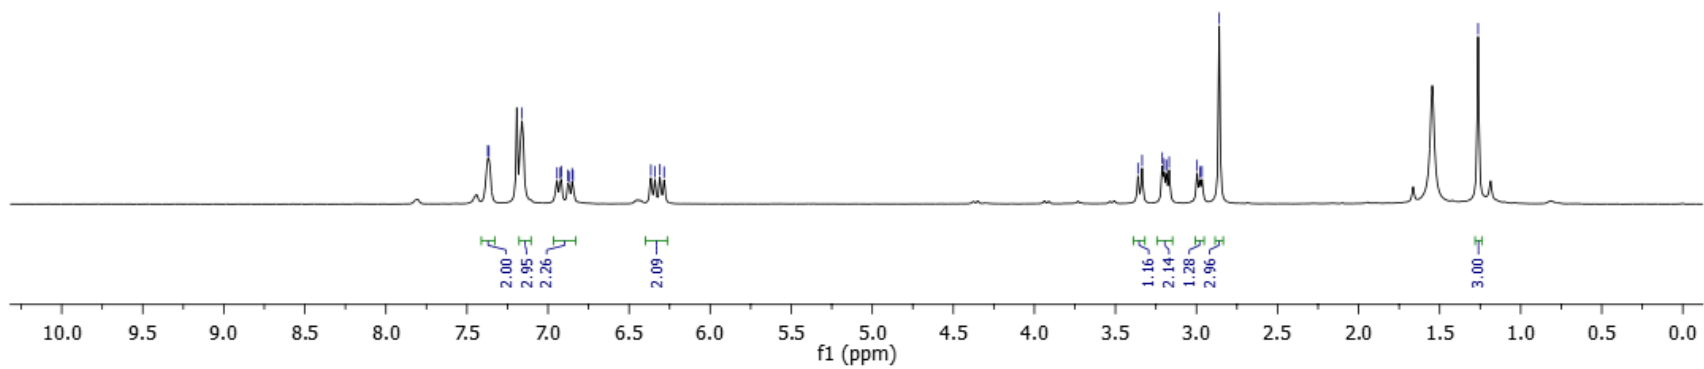

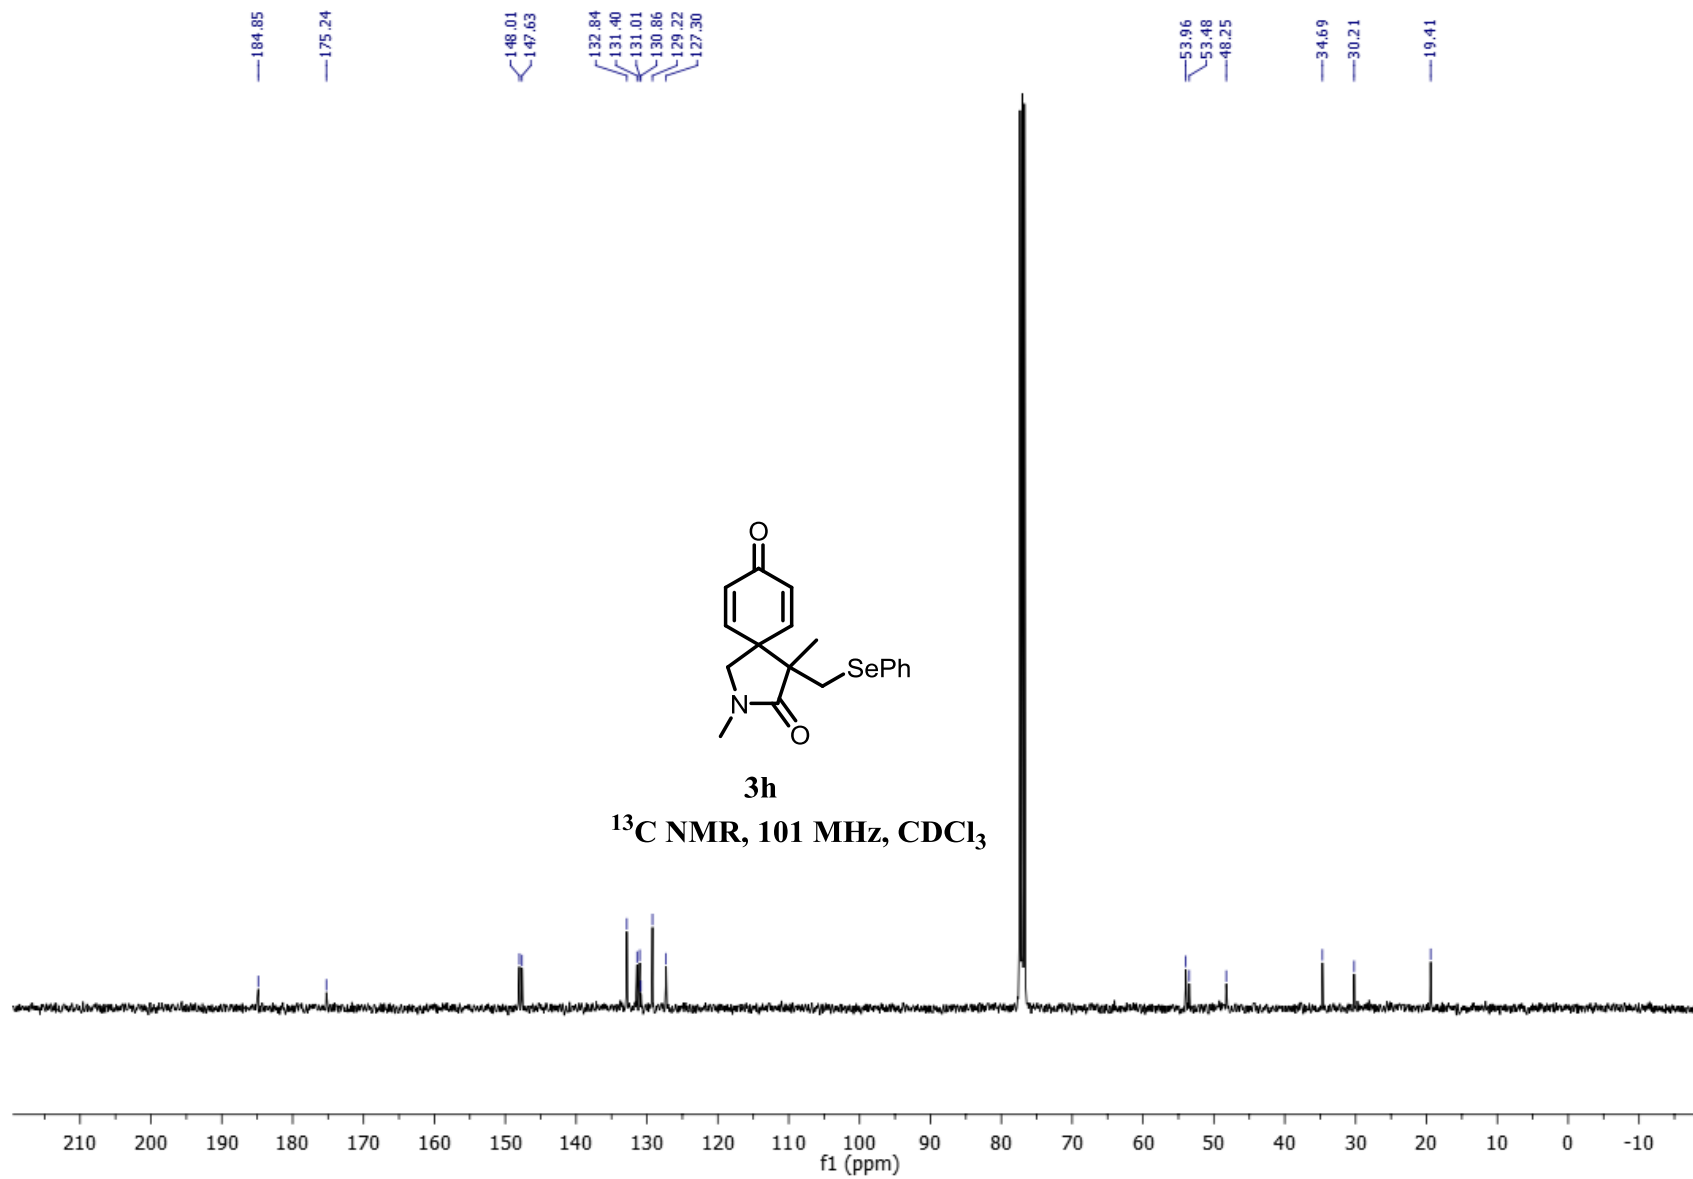

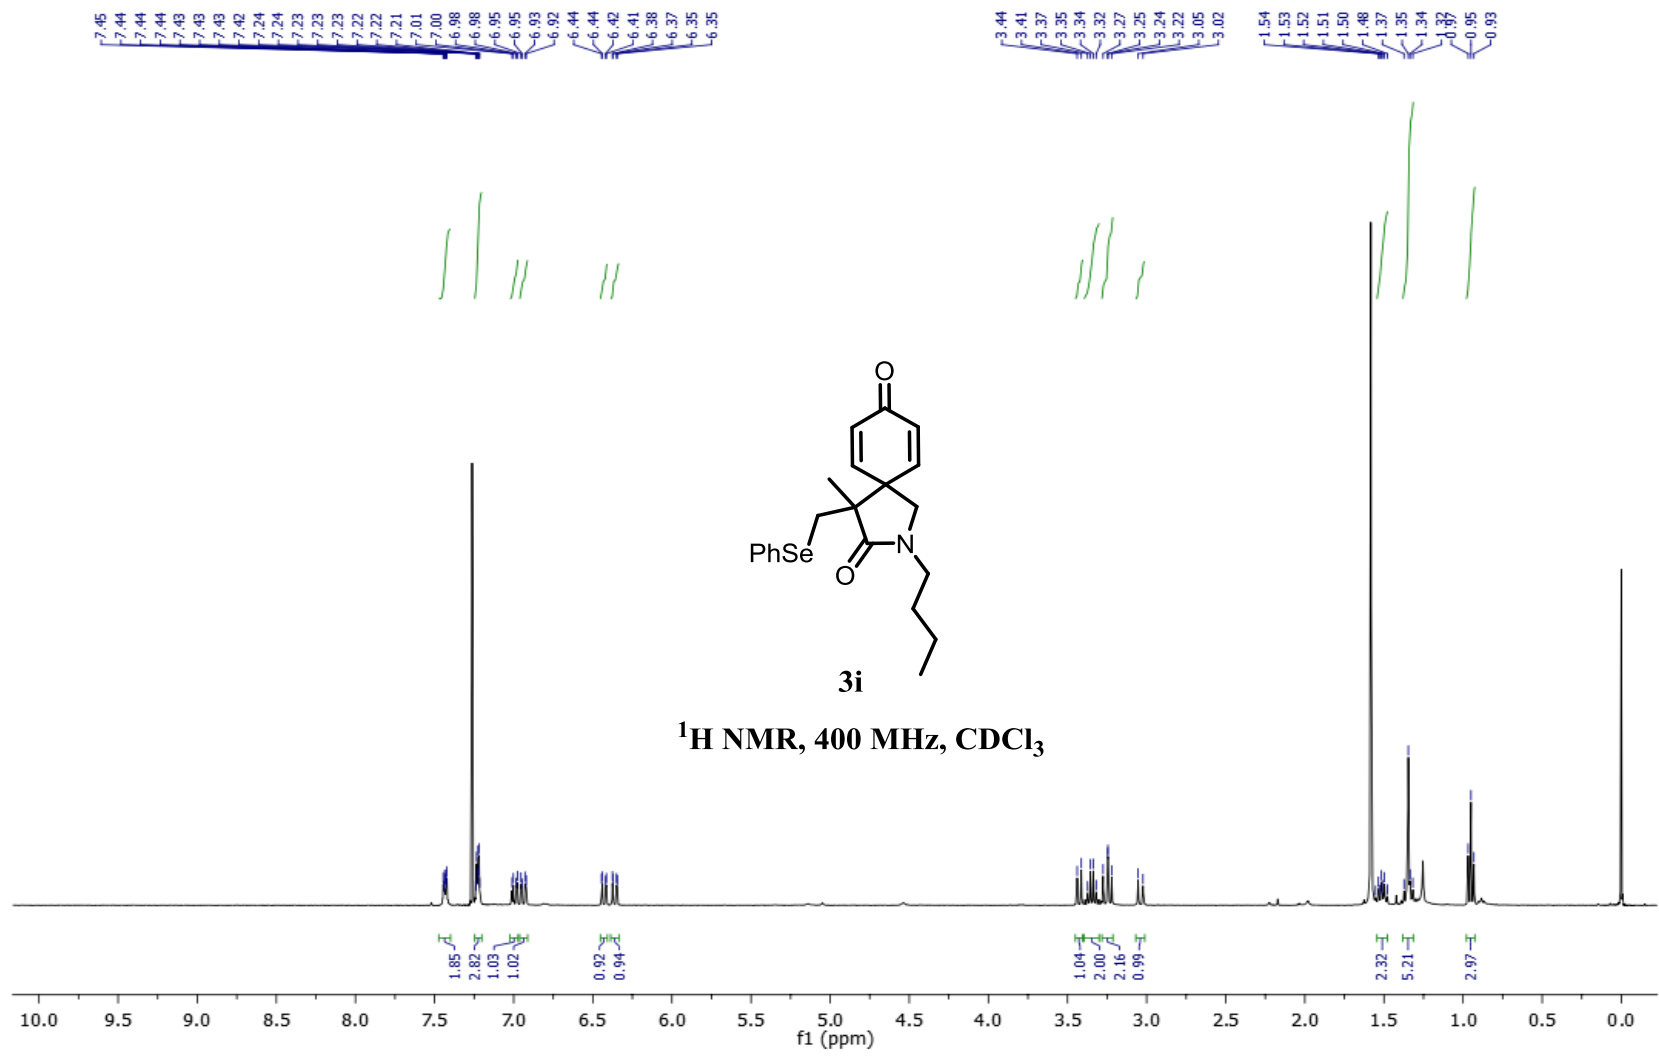

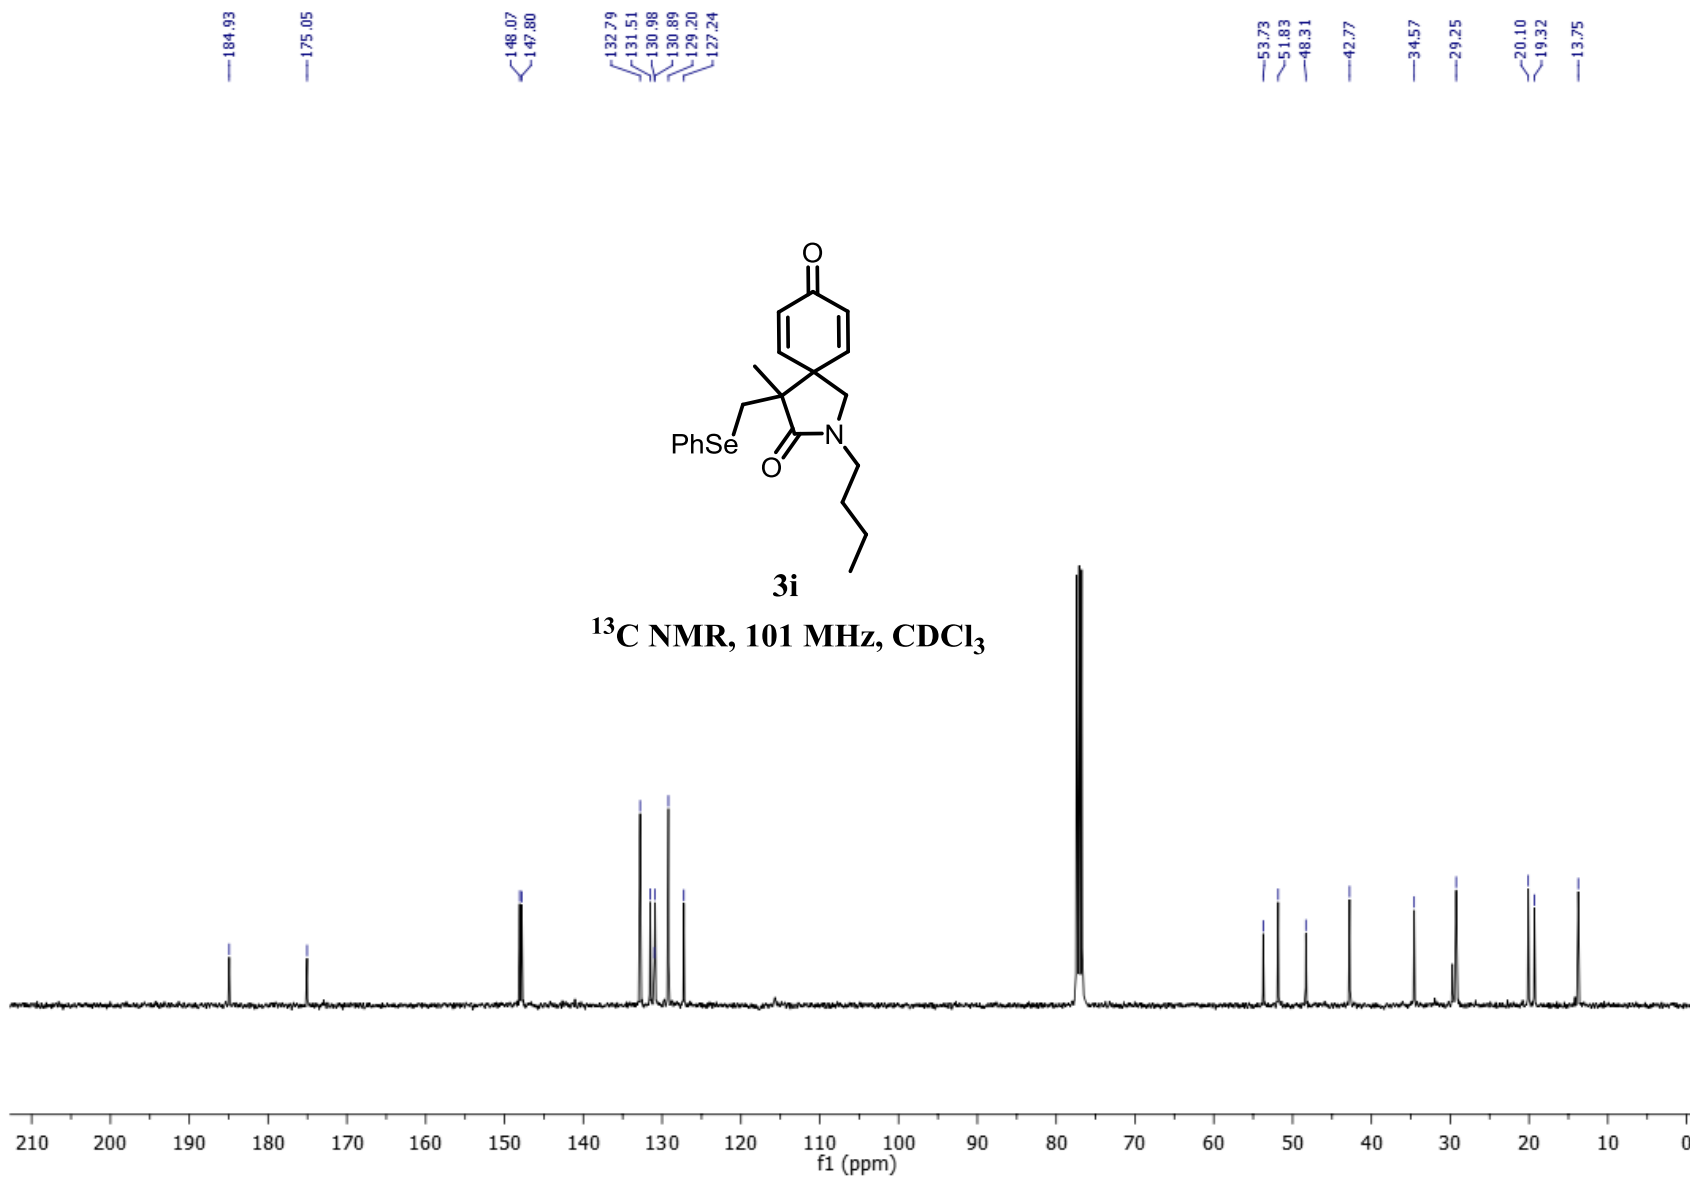

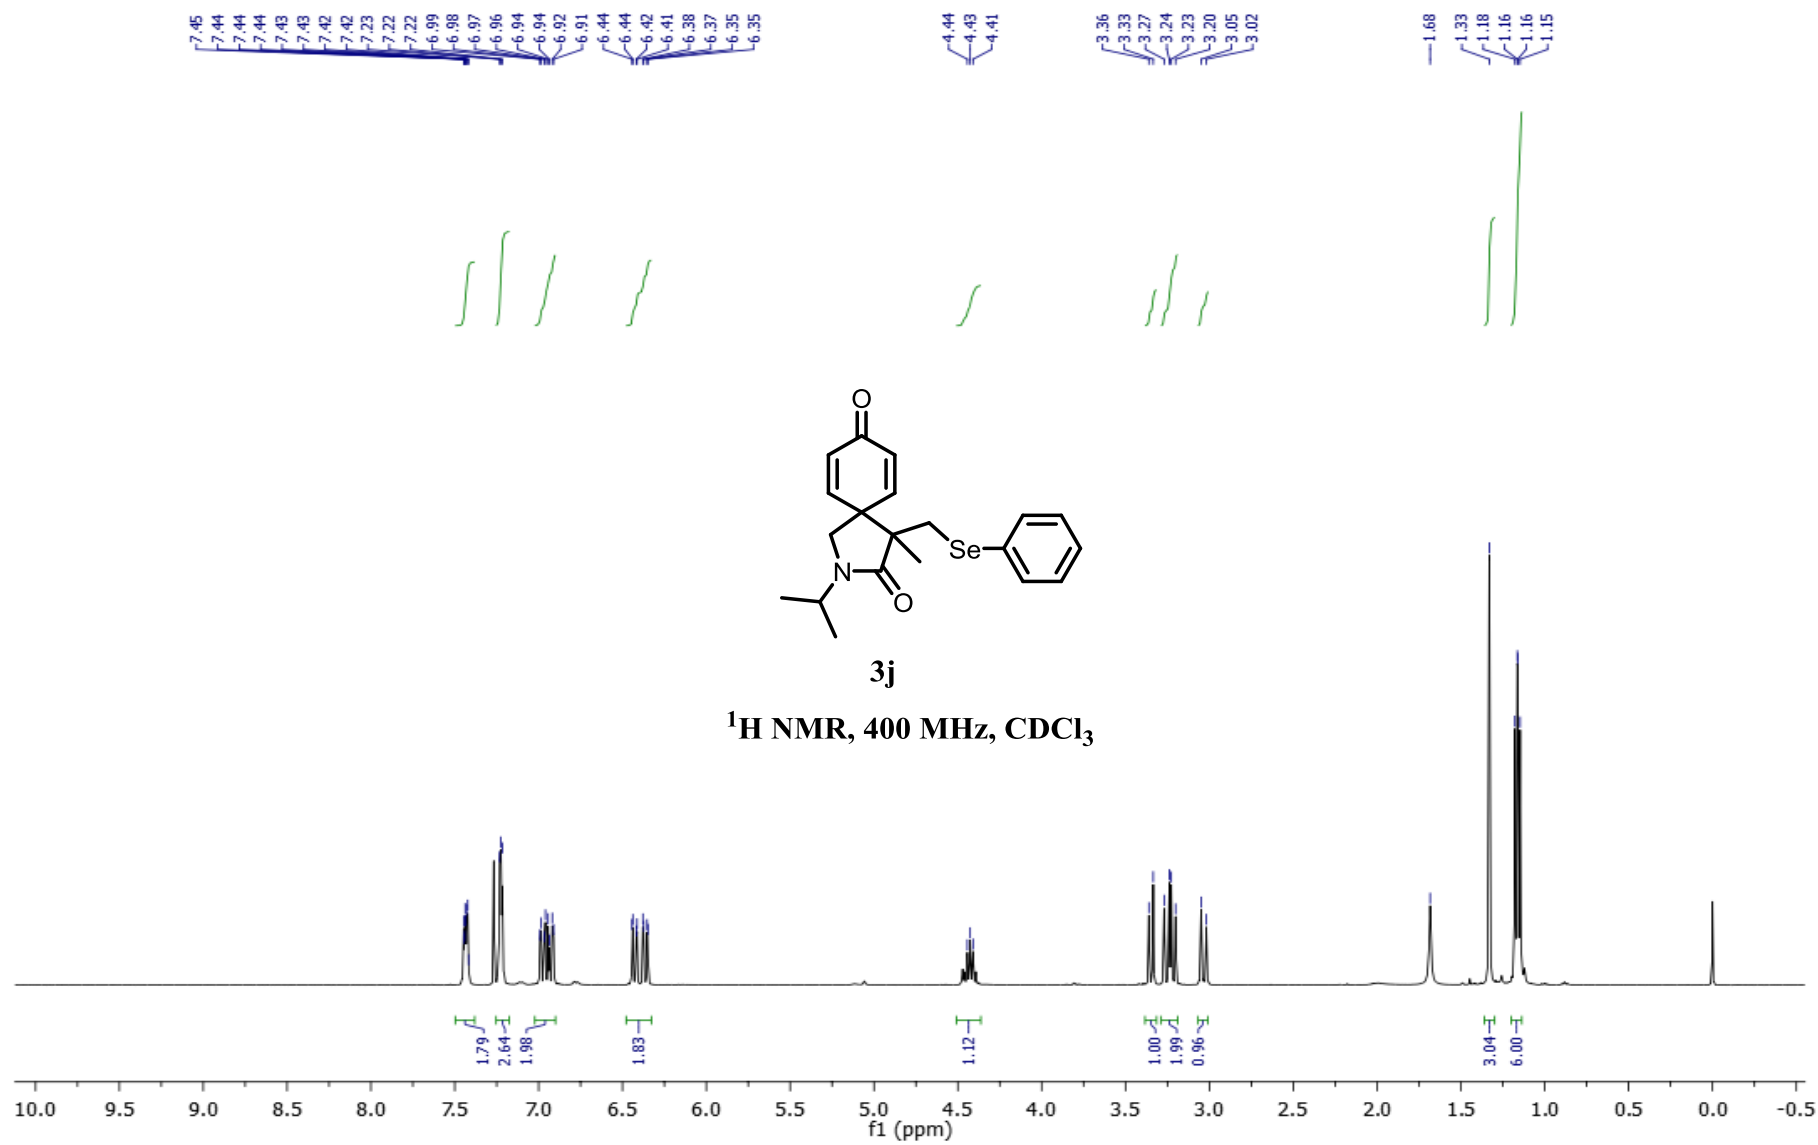

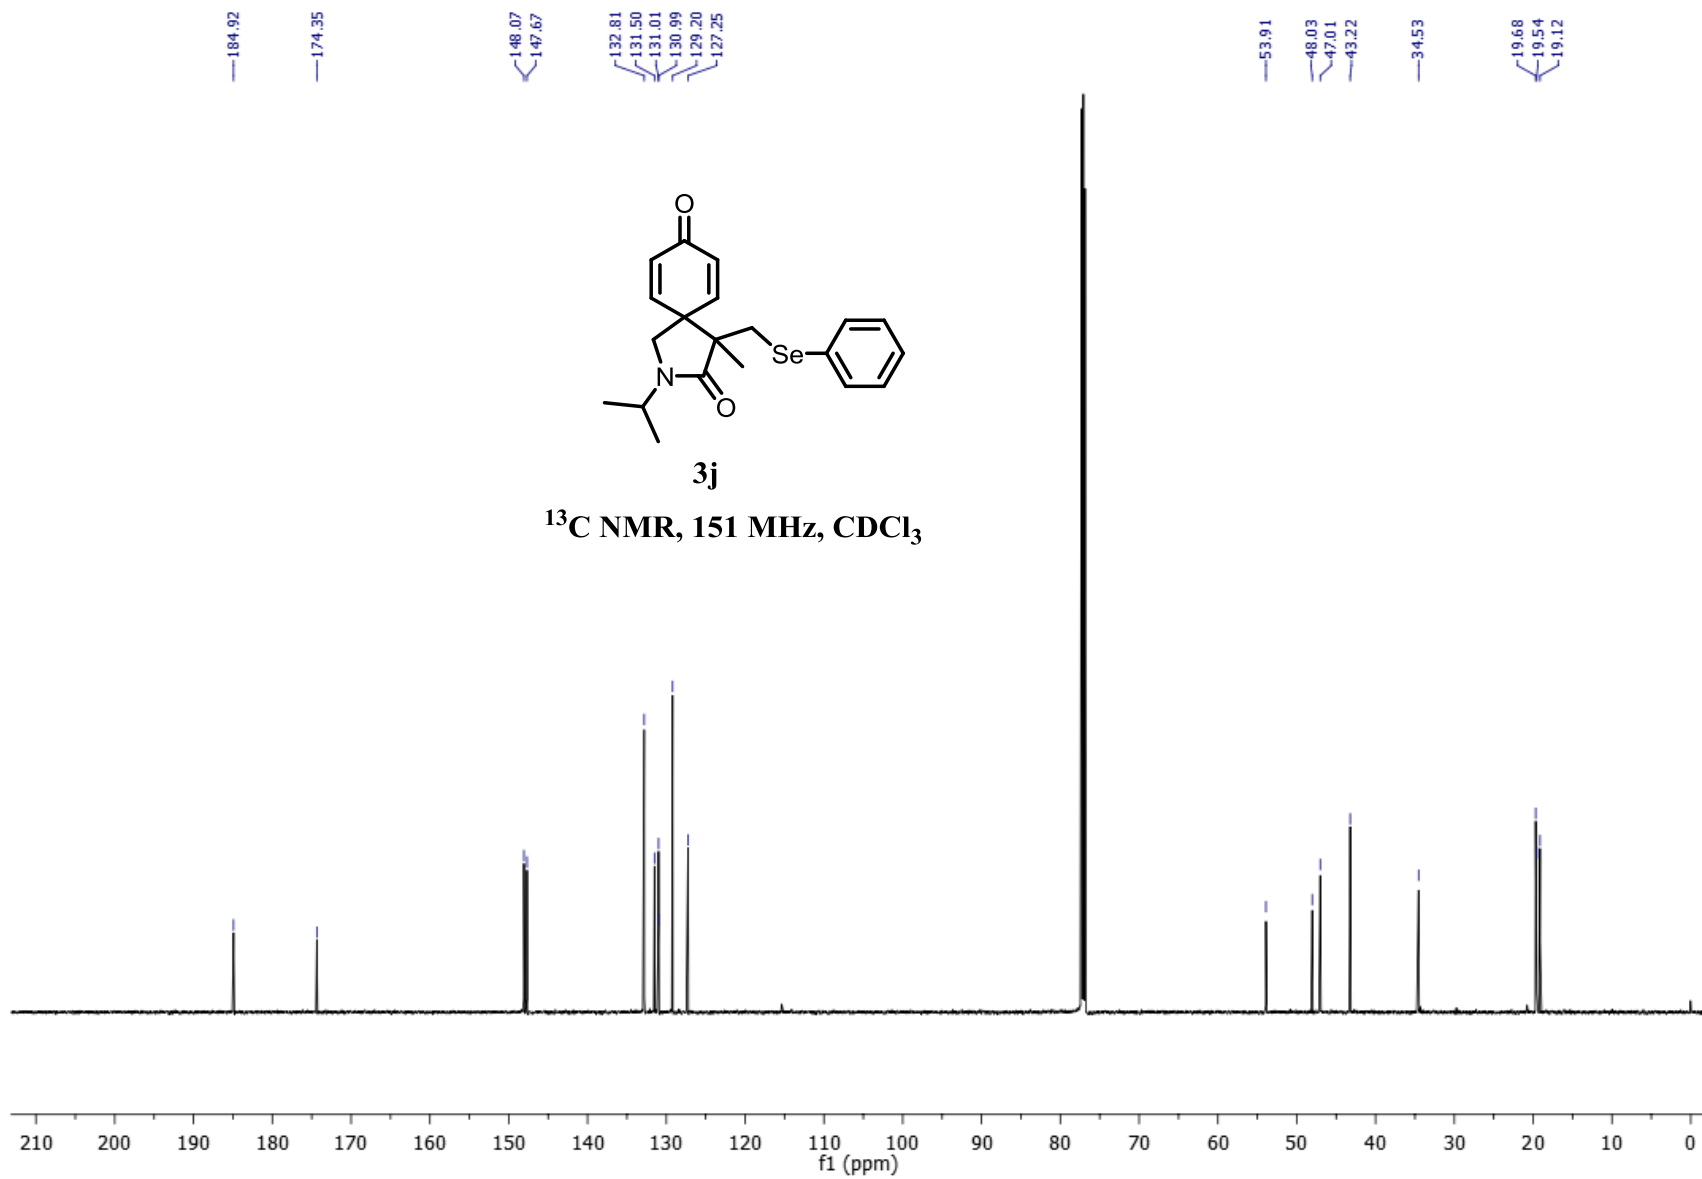

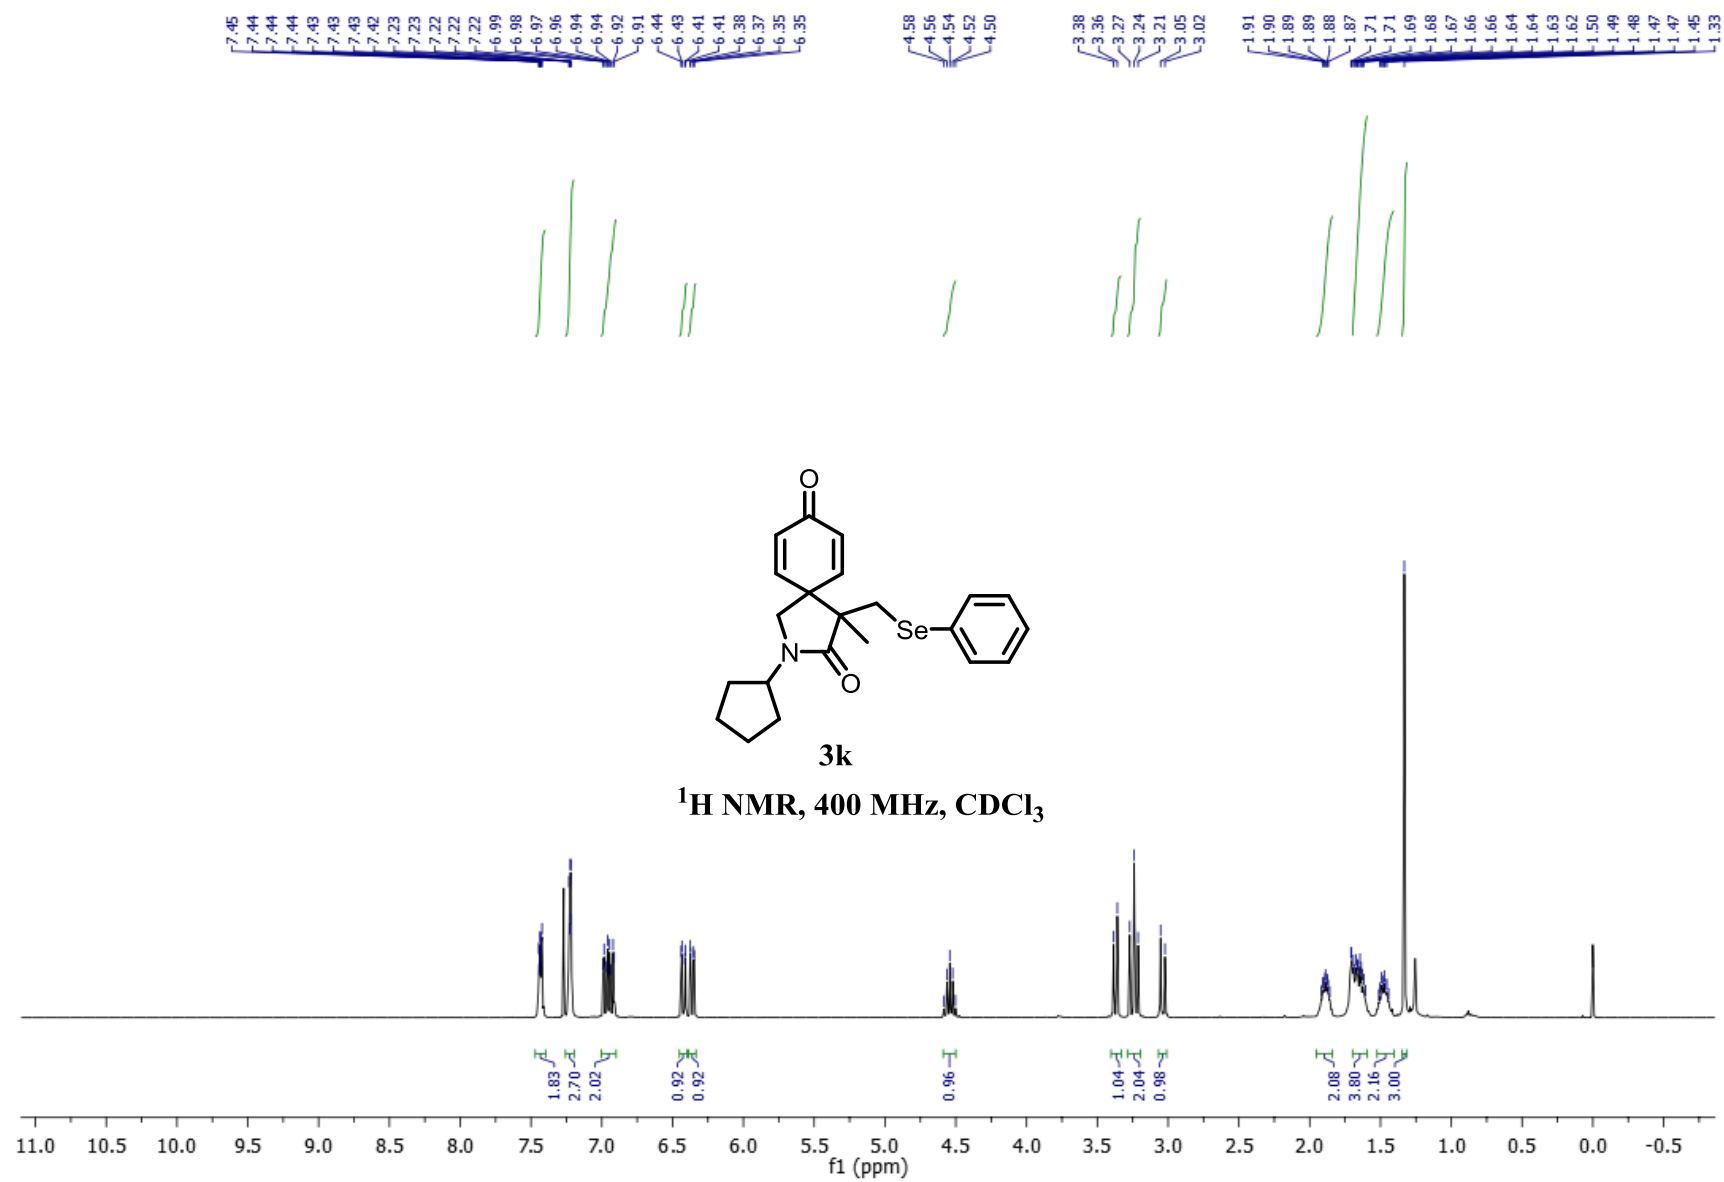

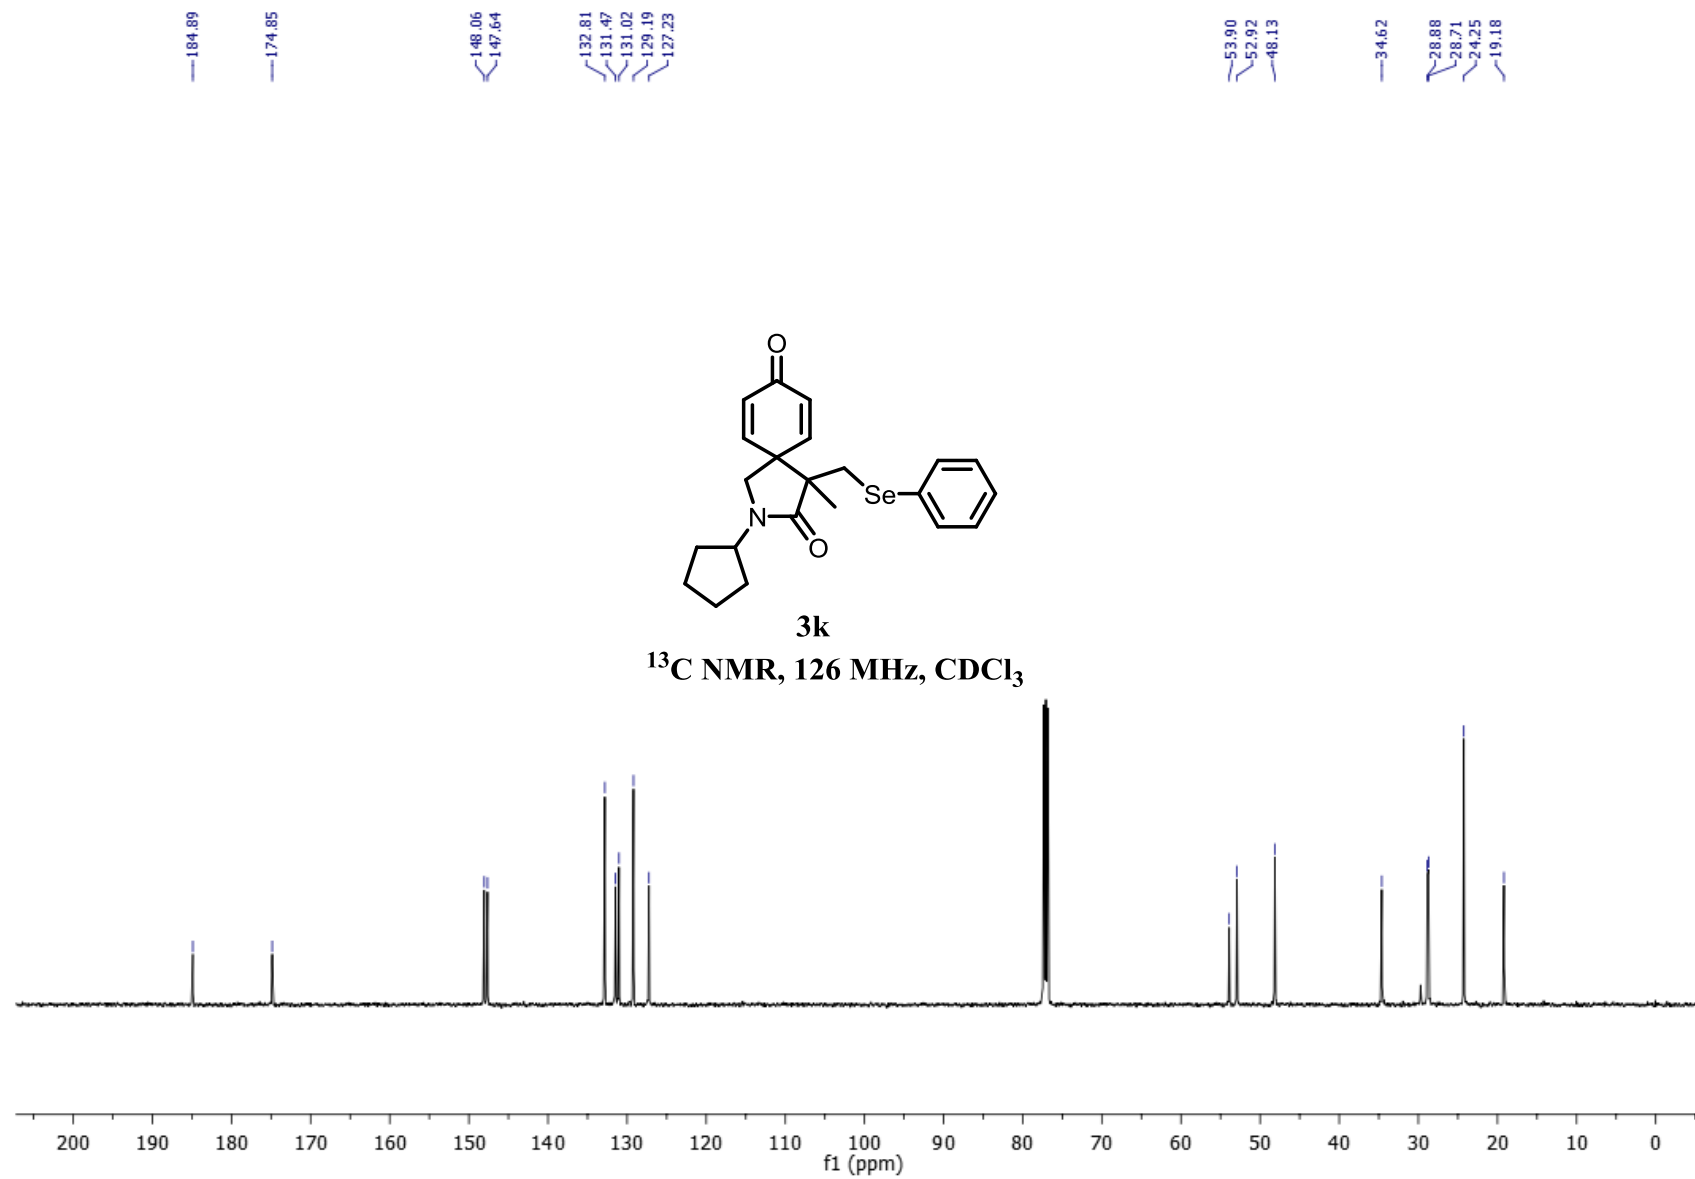



—248.12

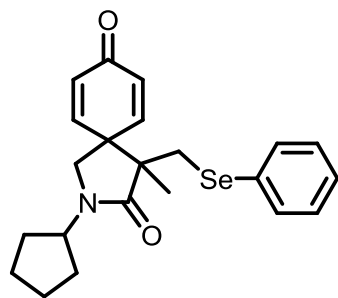

**3k**

<sup>77</sup>Se NMR, 76 MHz, CDCl<sub>3</sub>

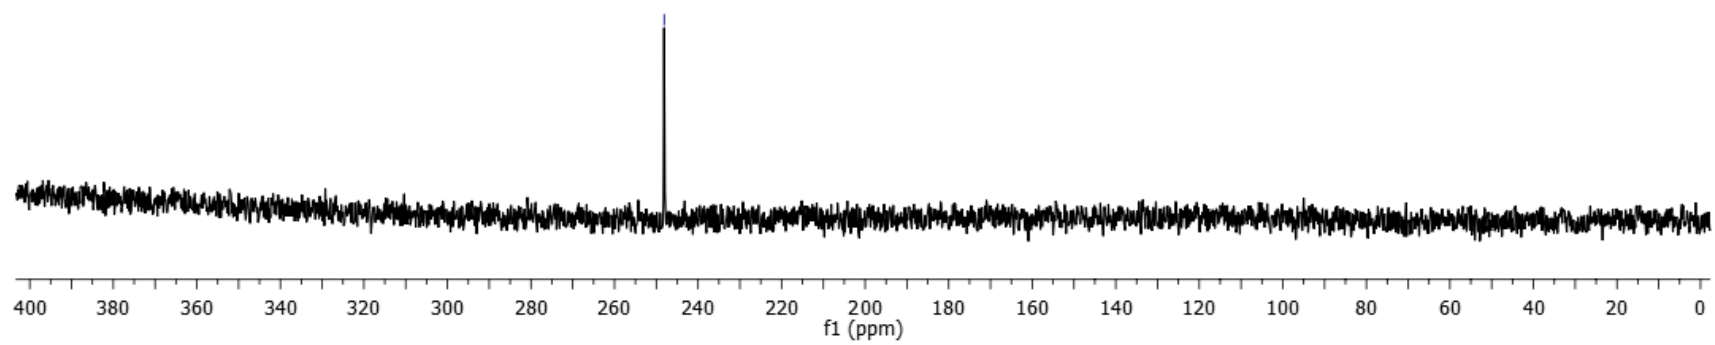

S33

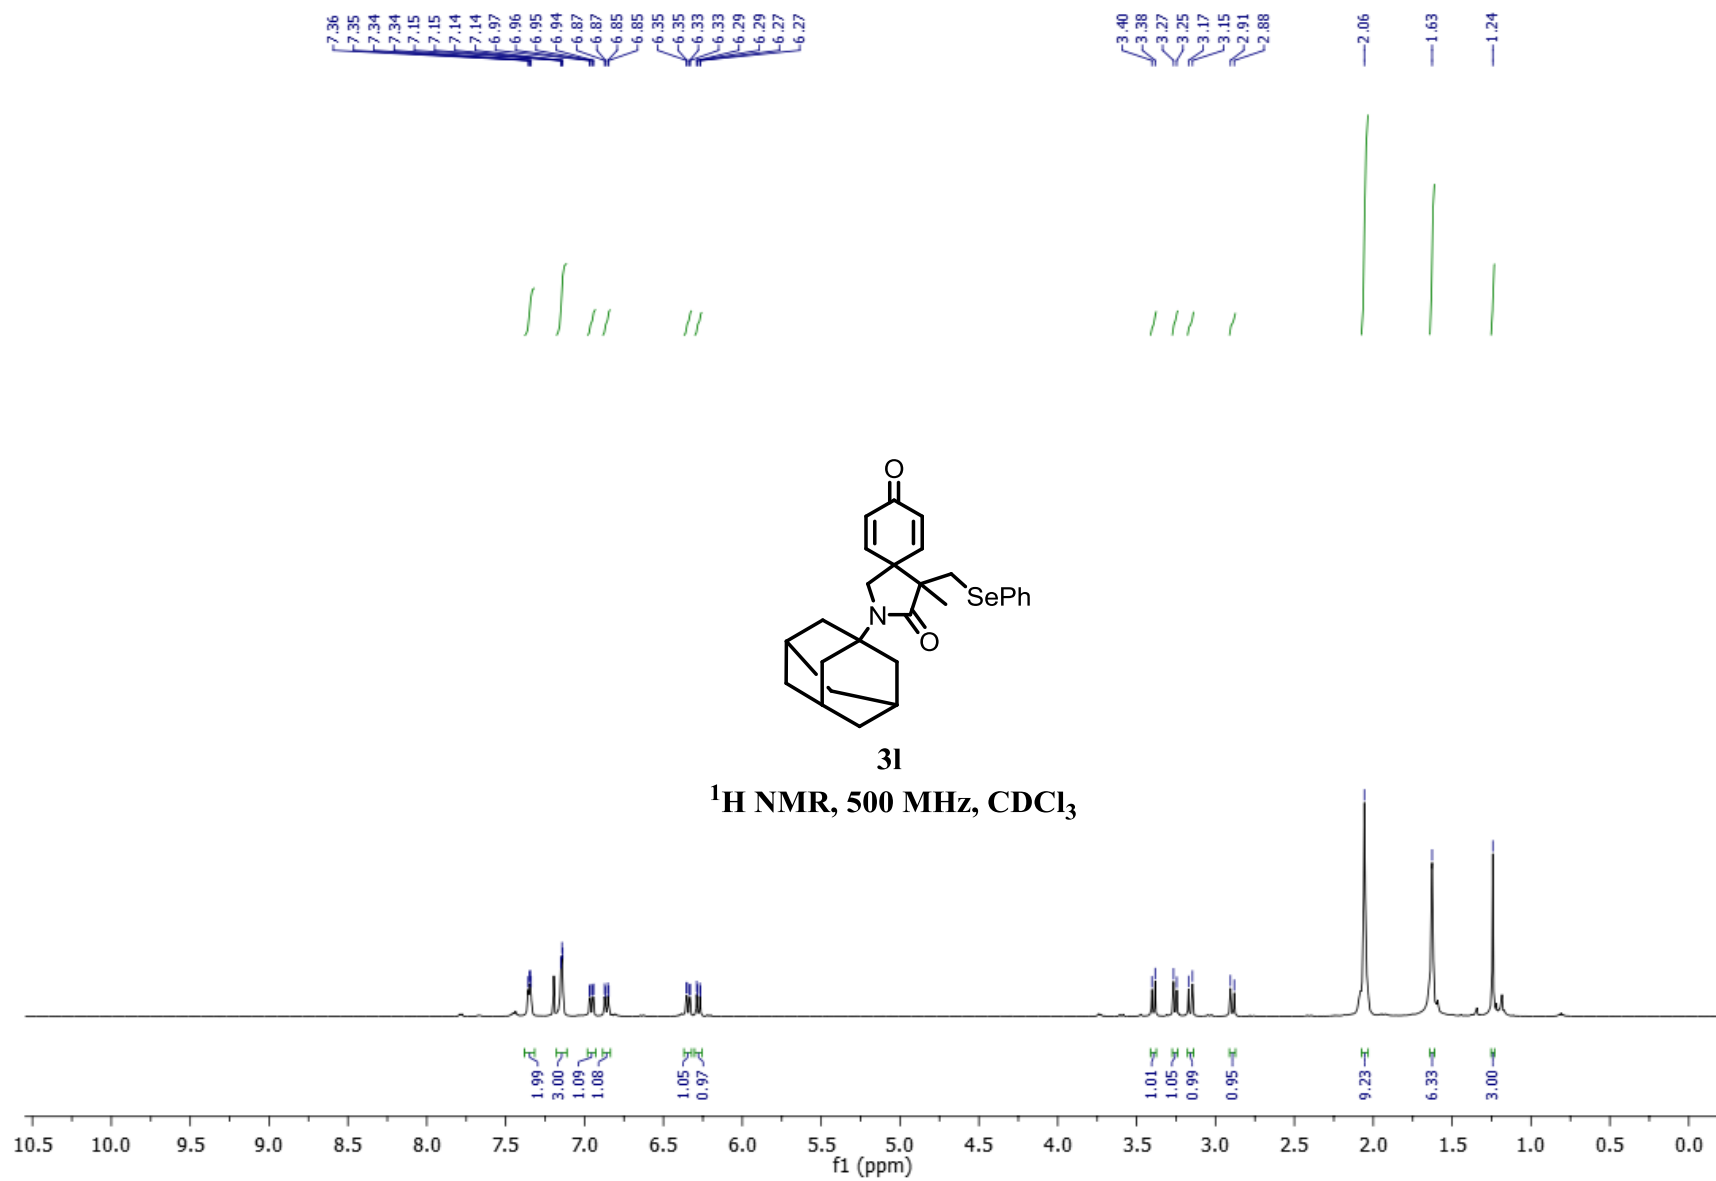

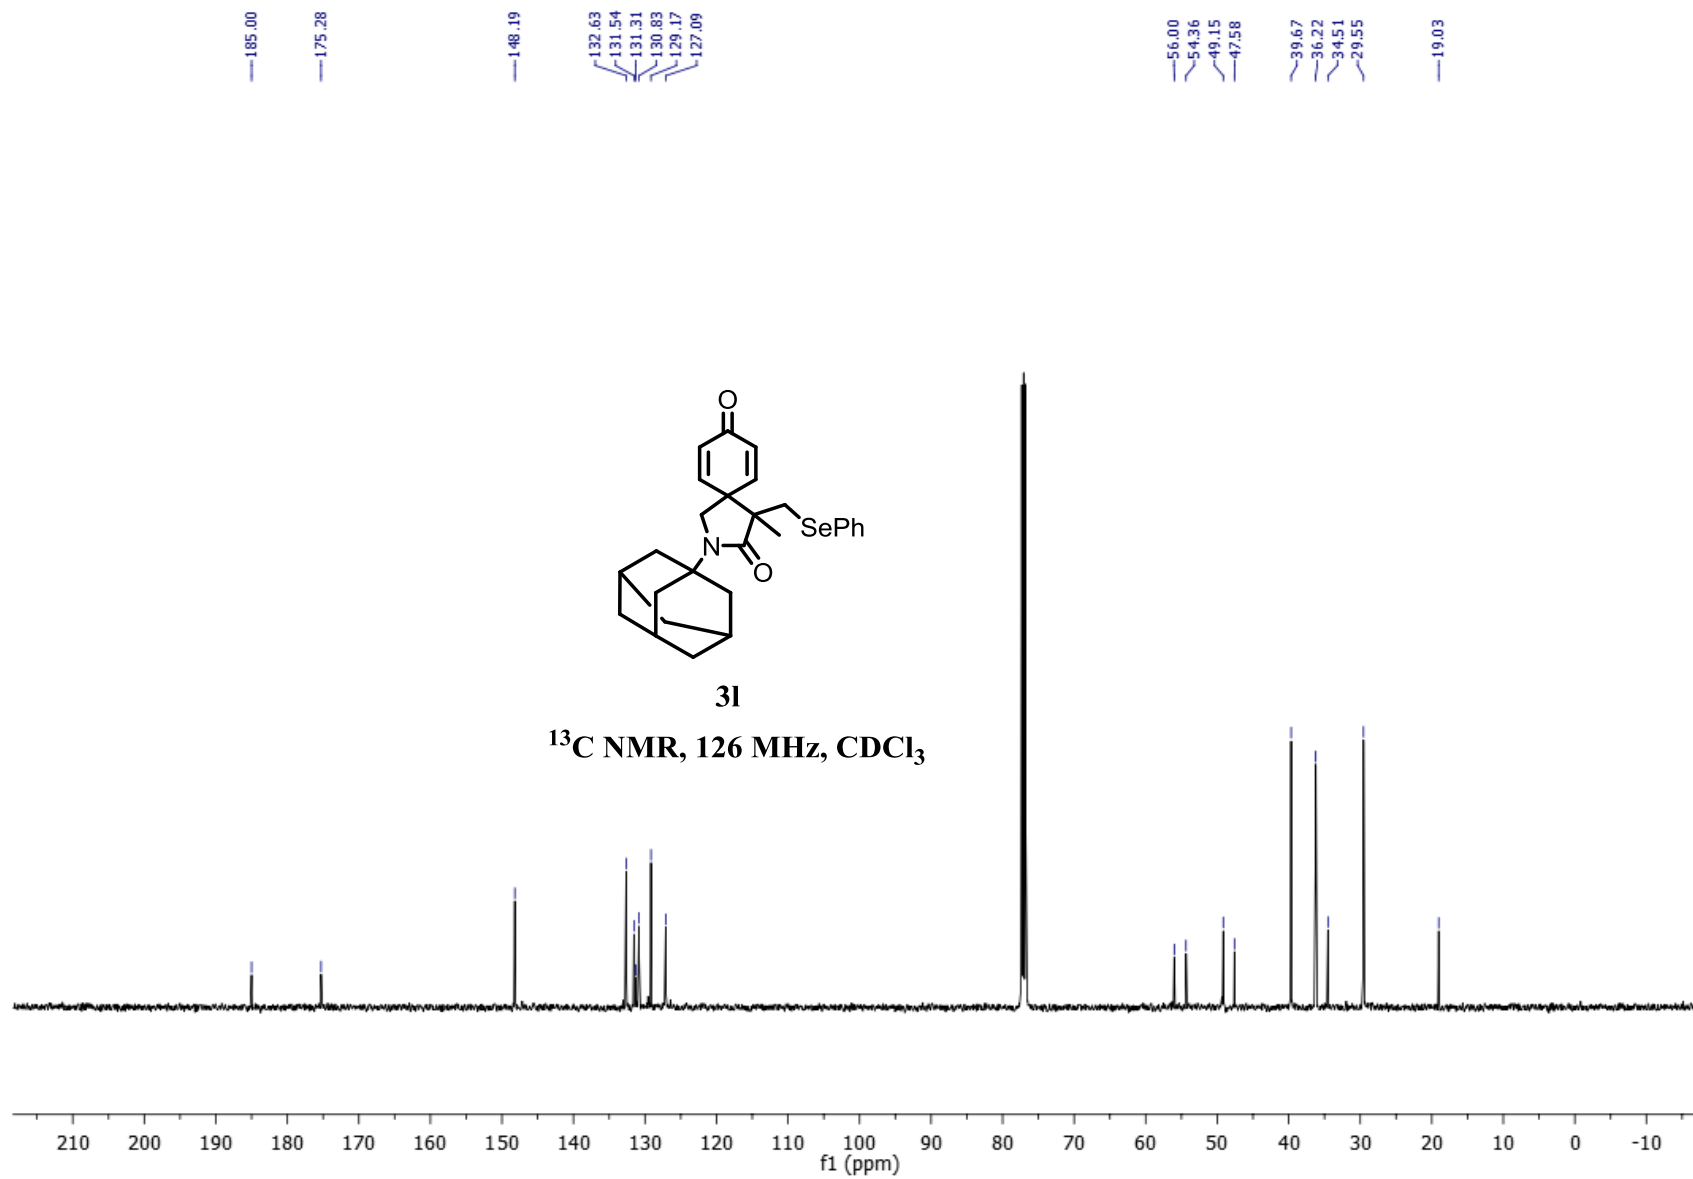

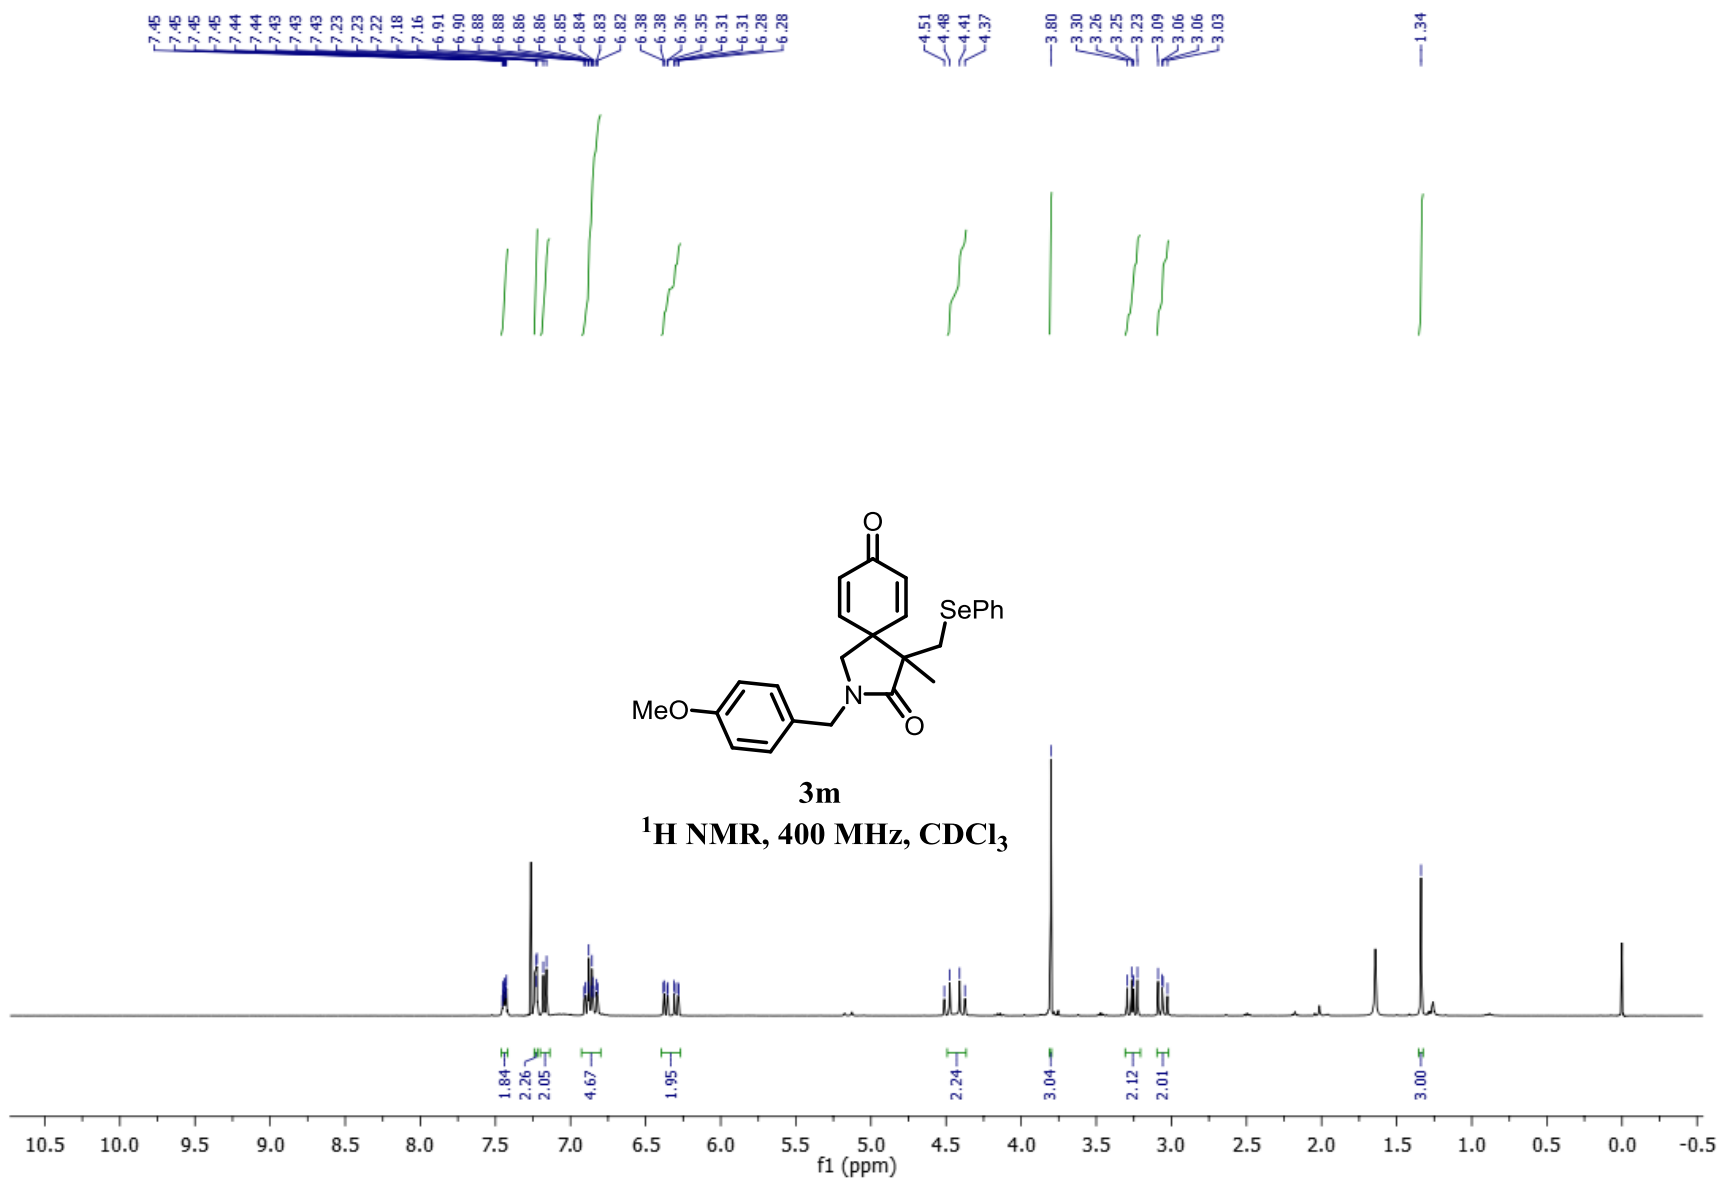

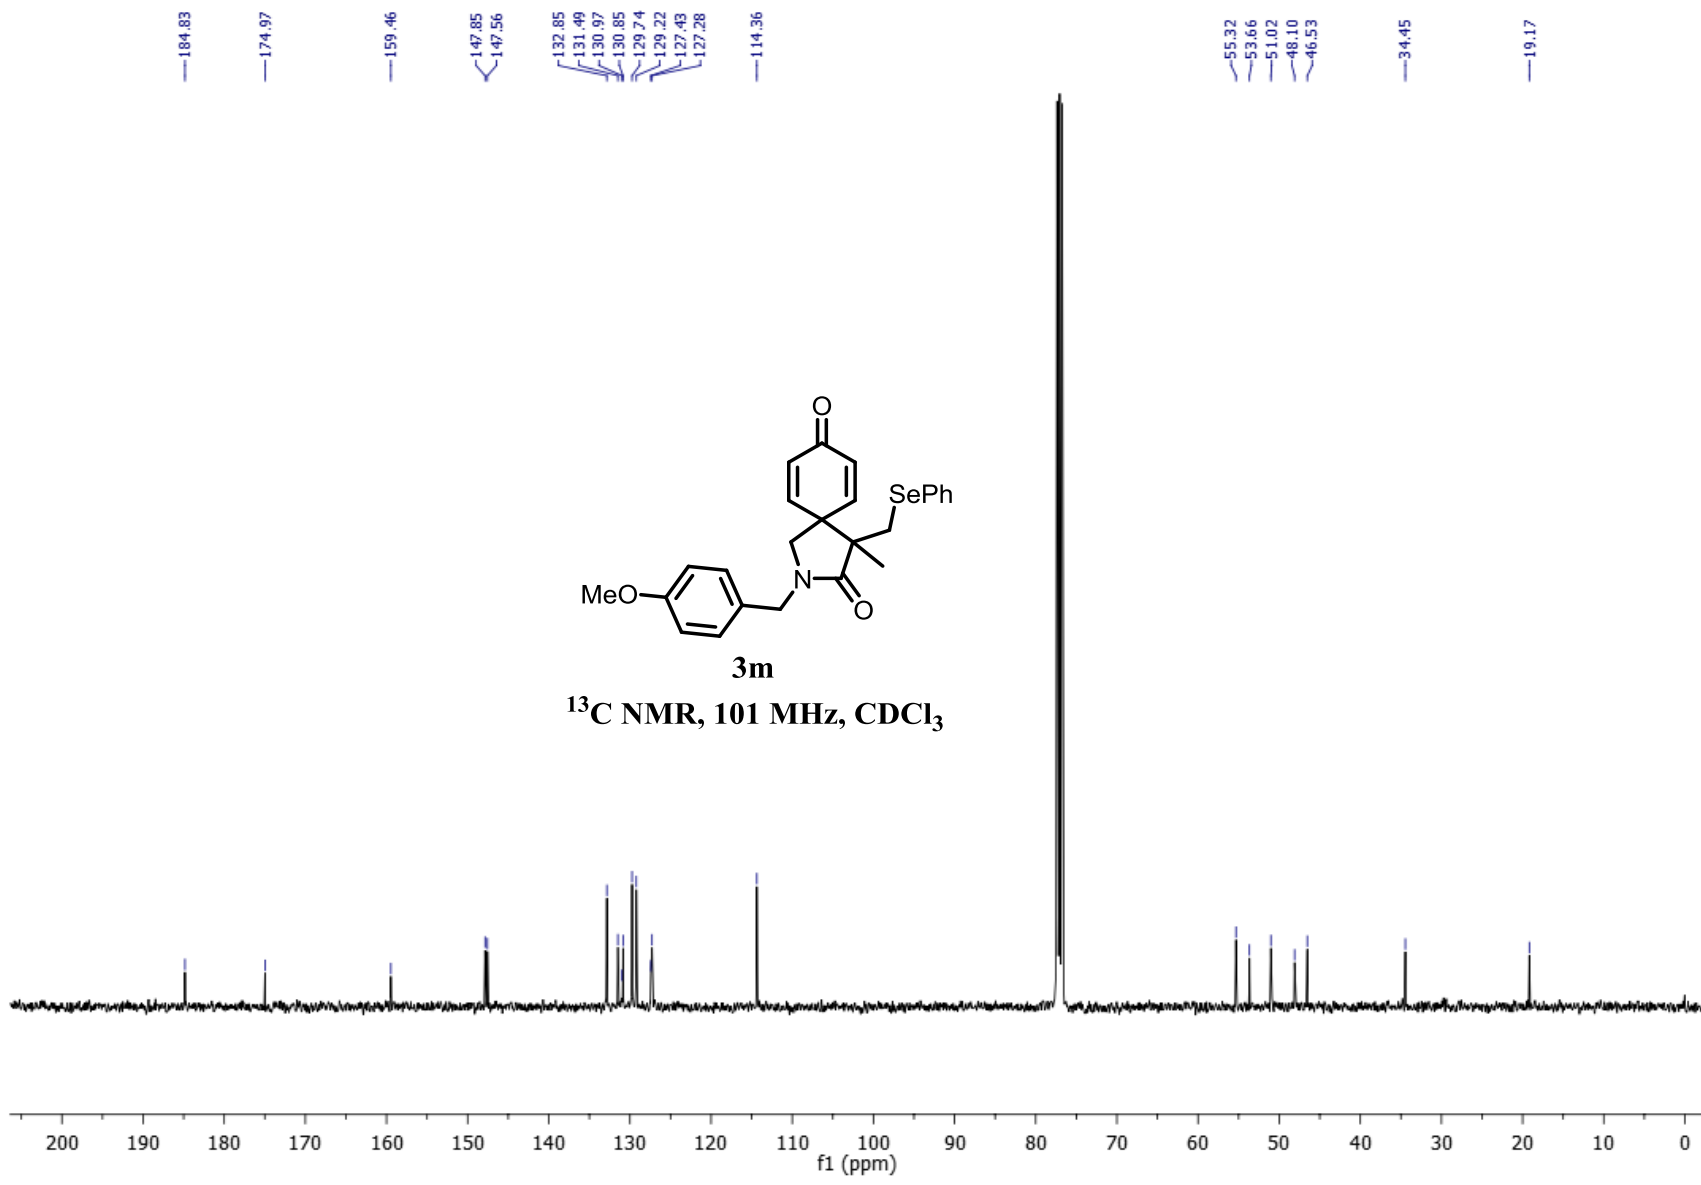

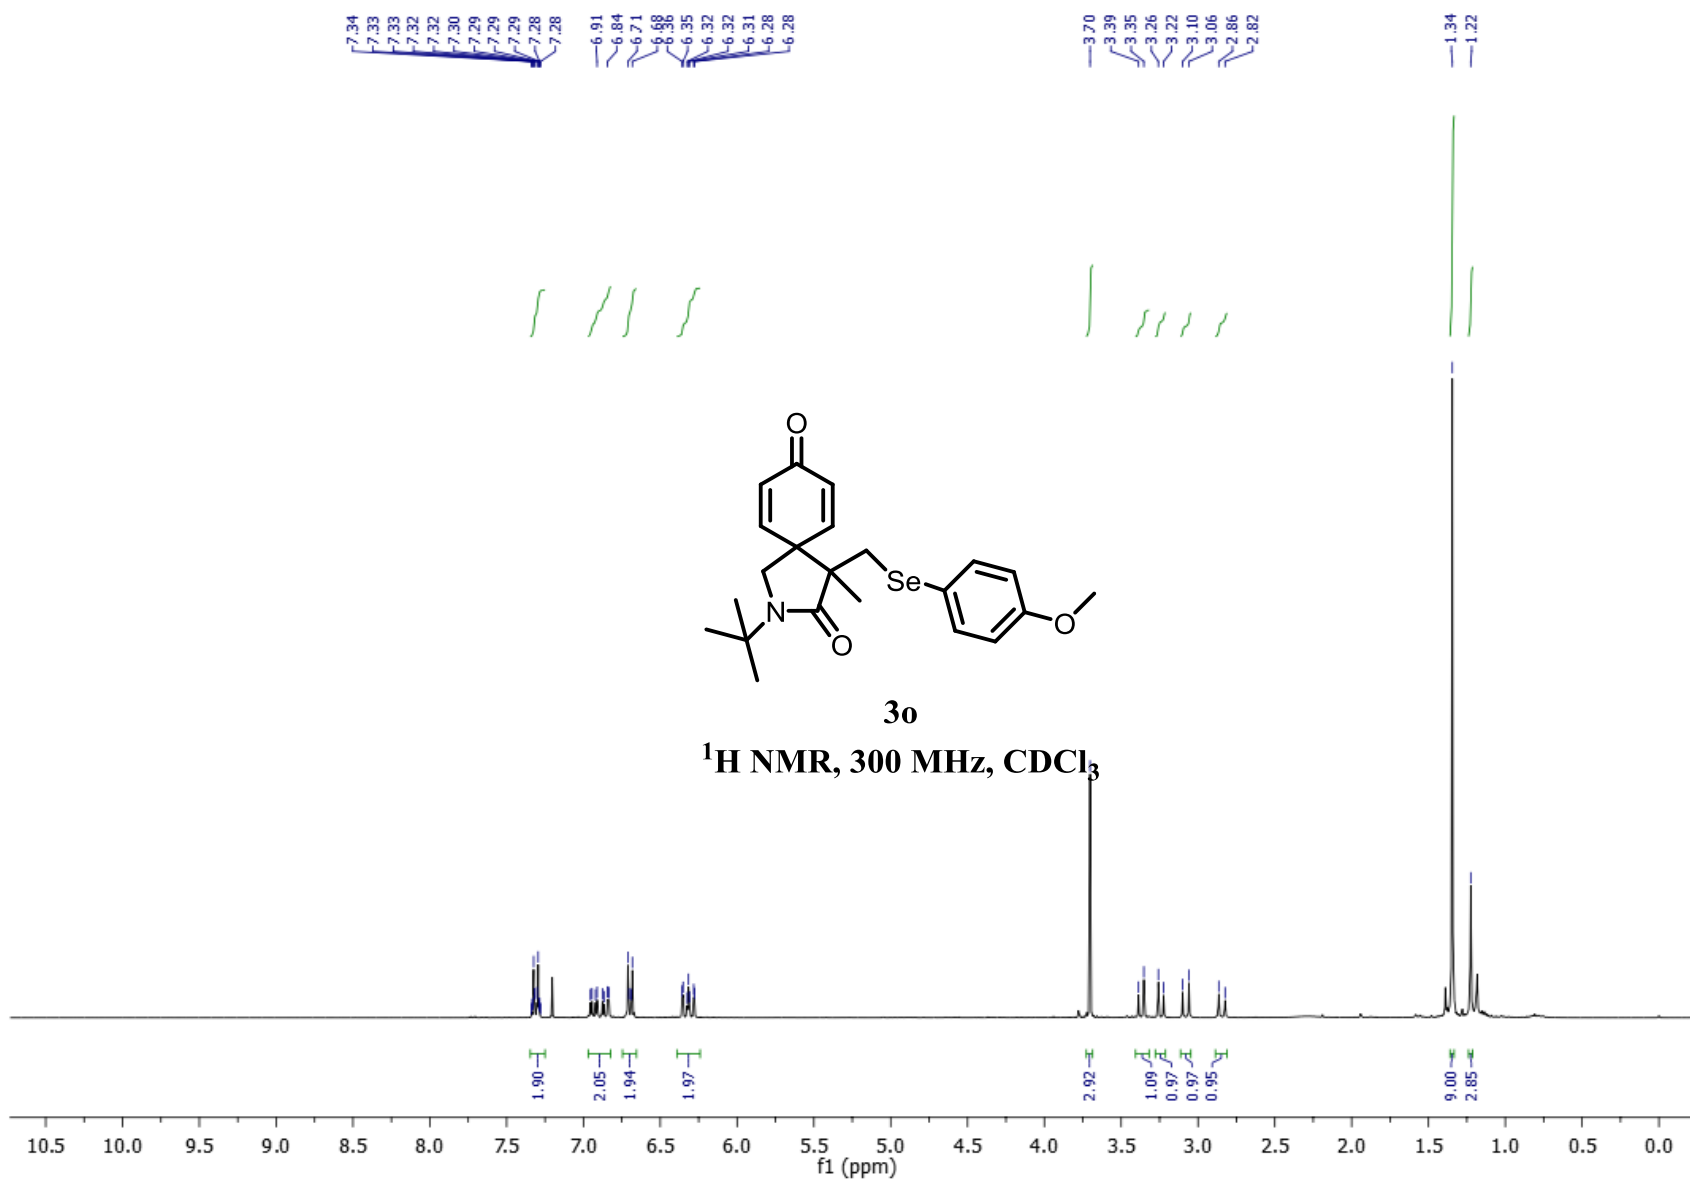

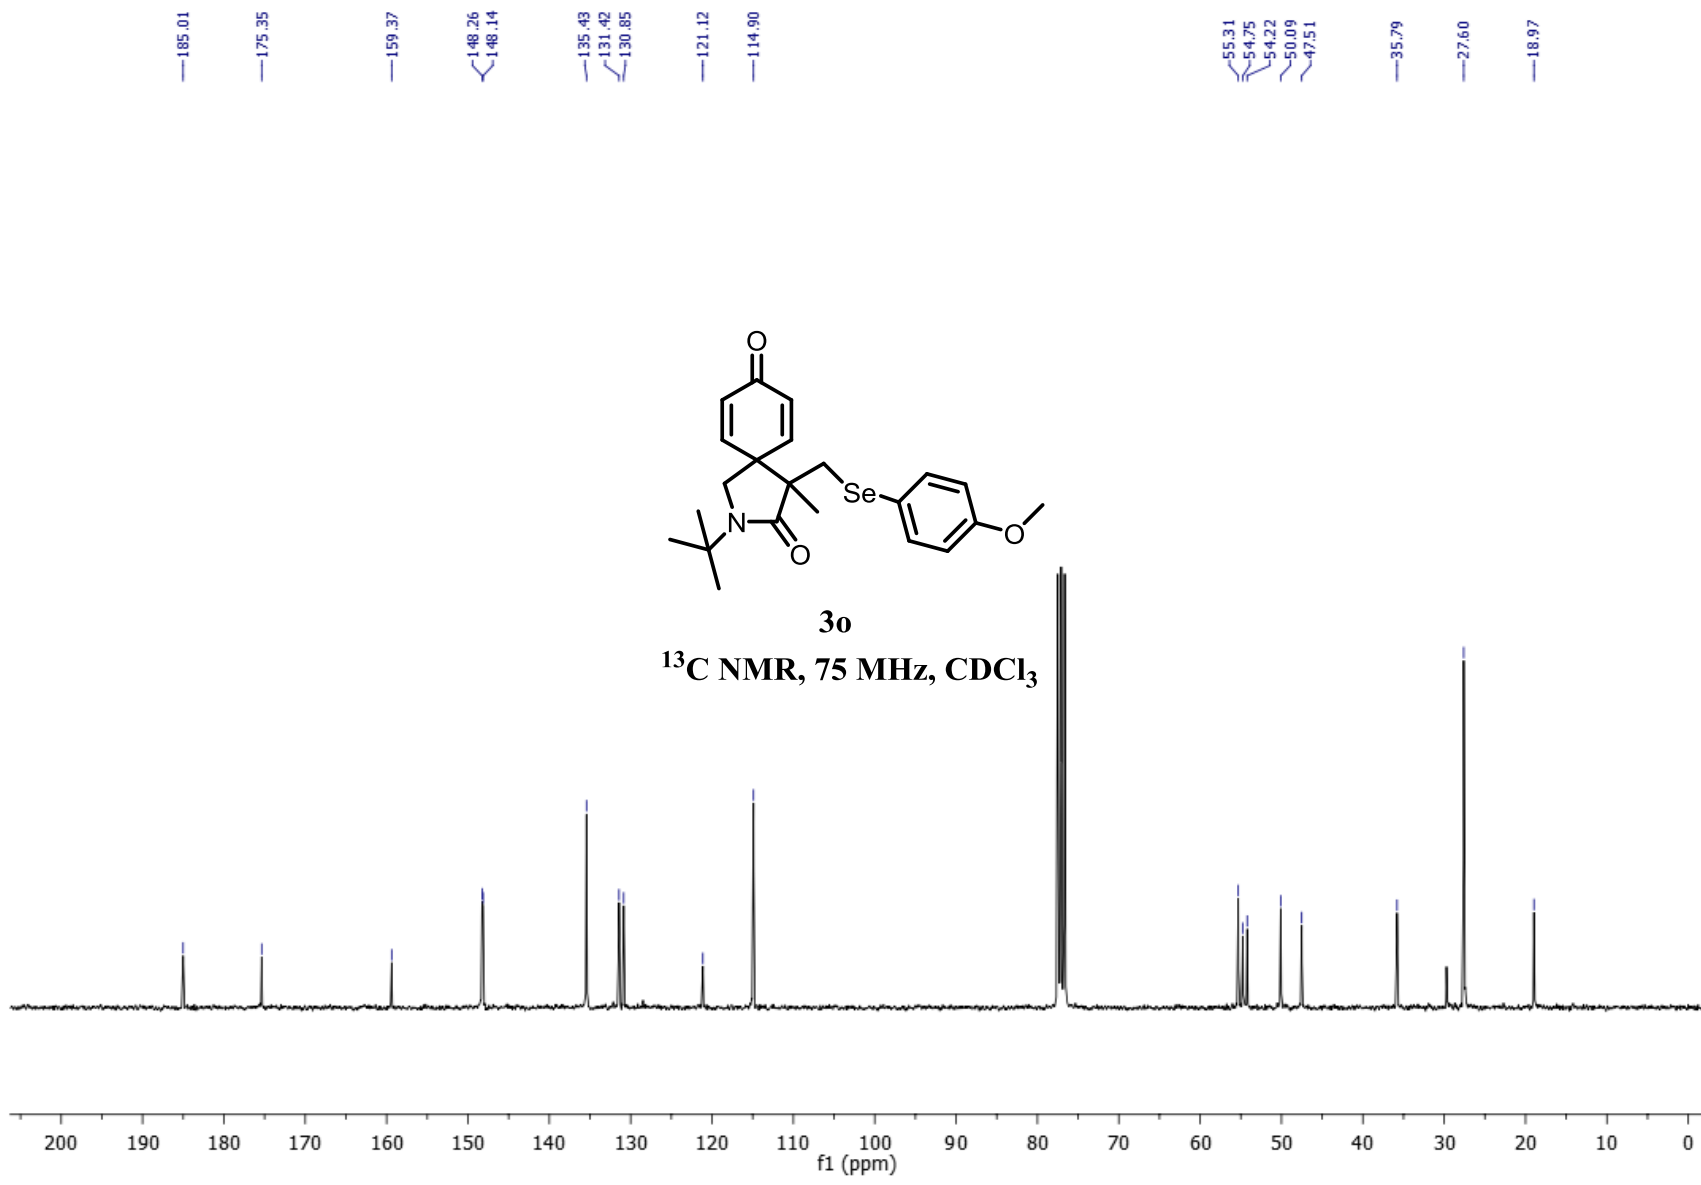

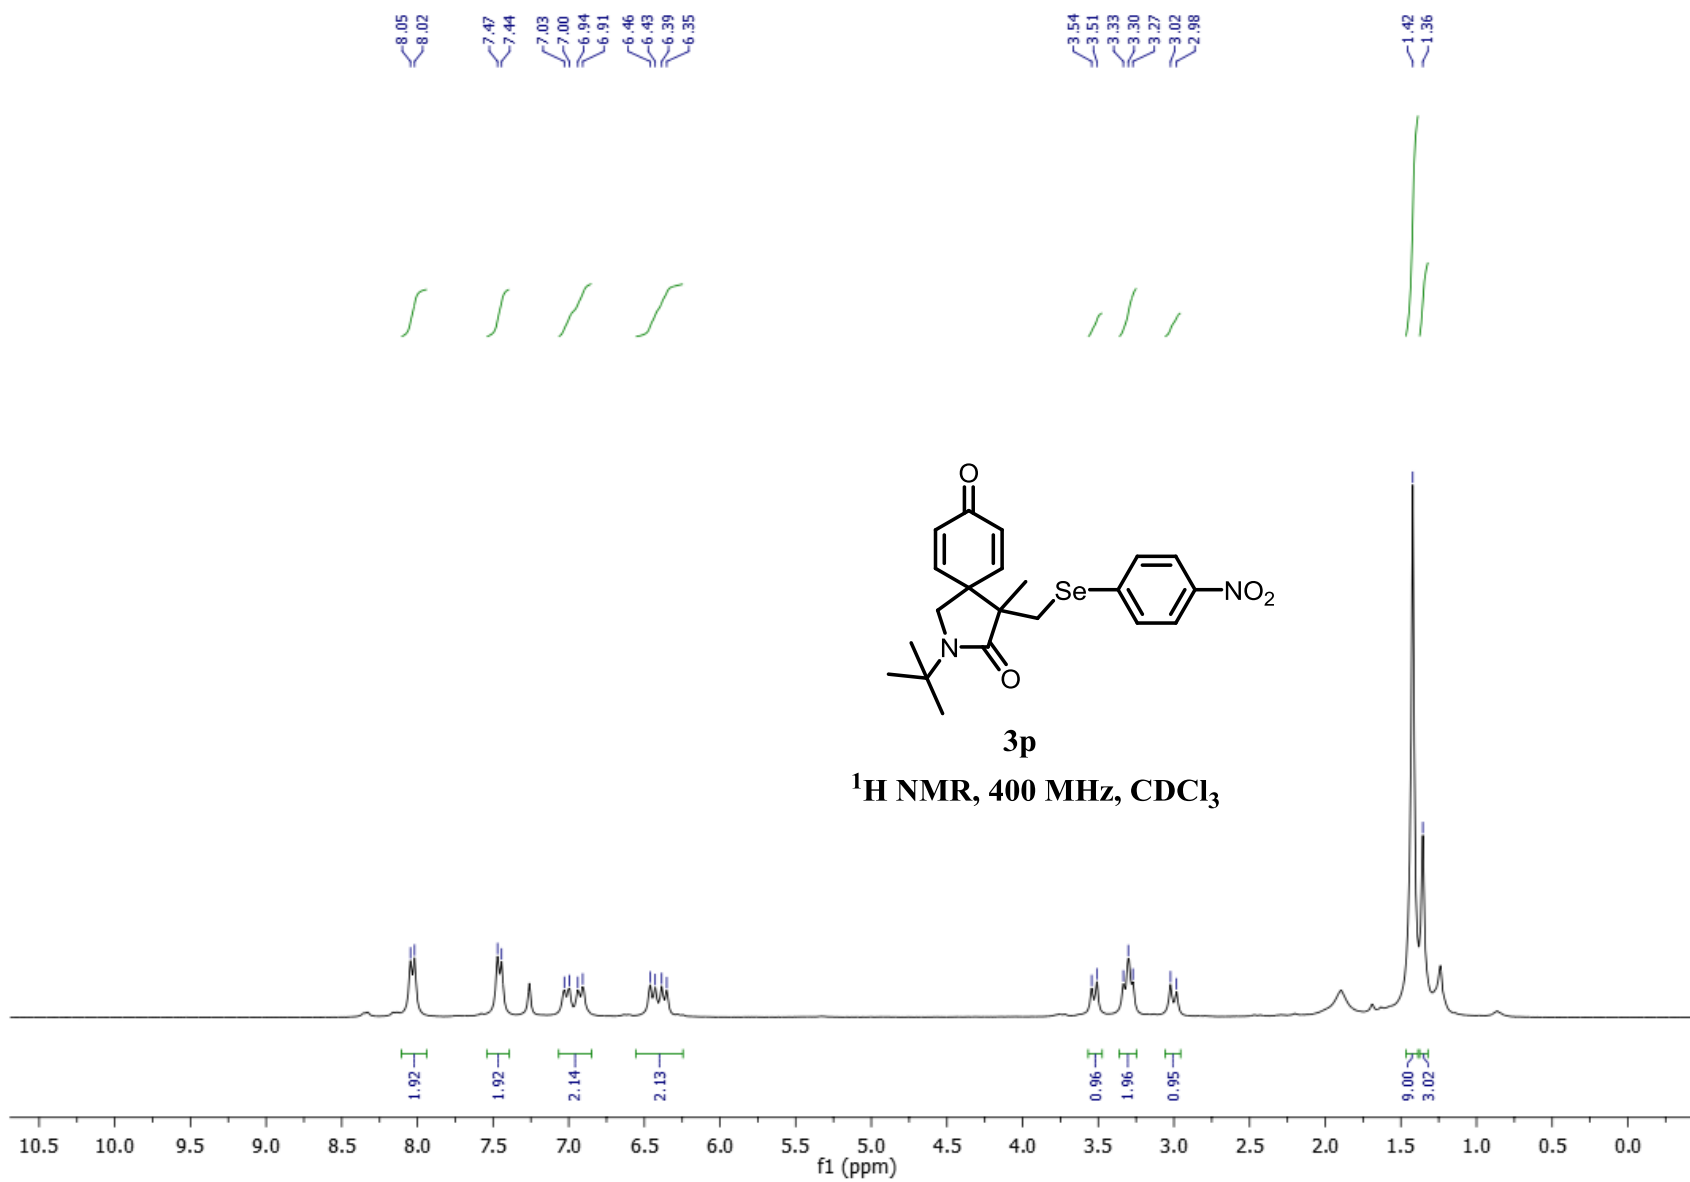



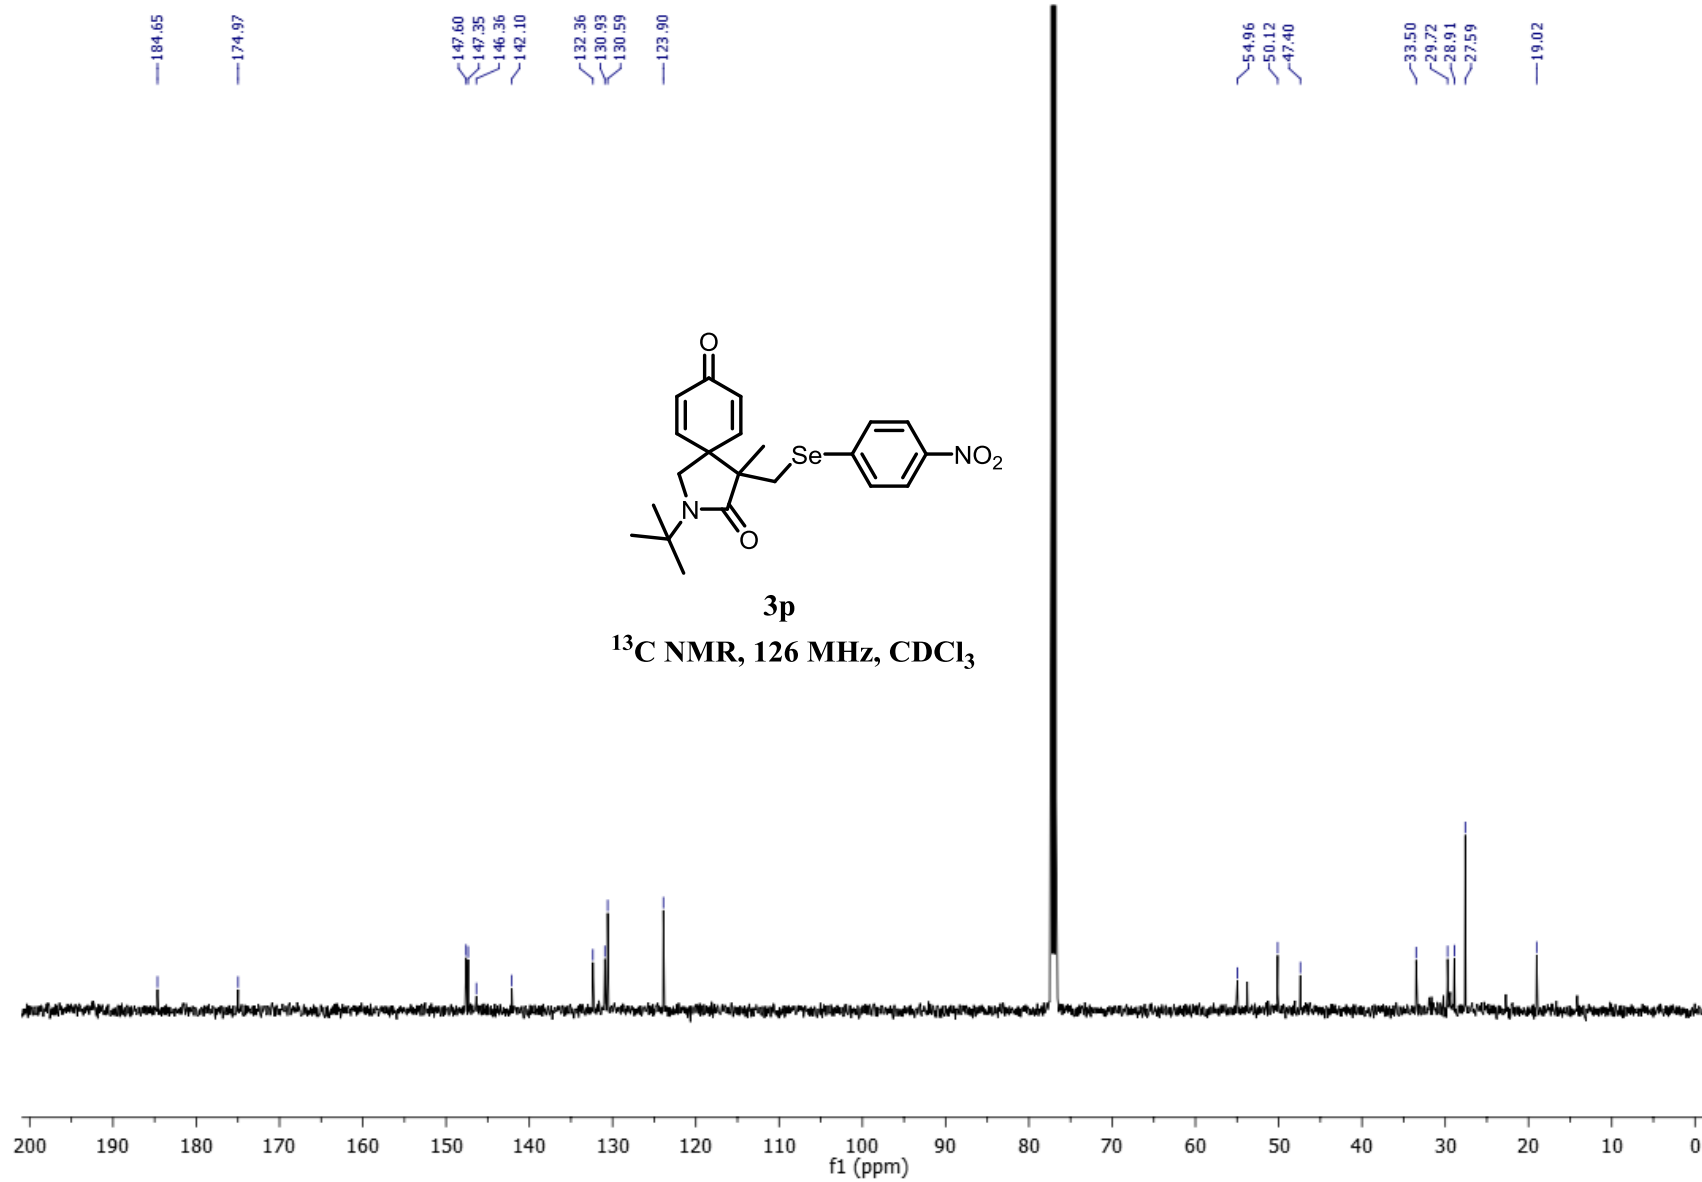

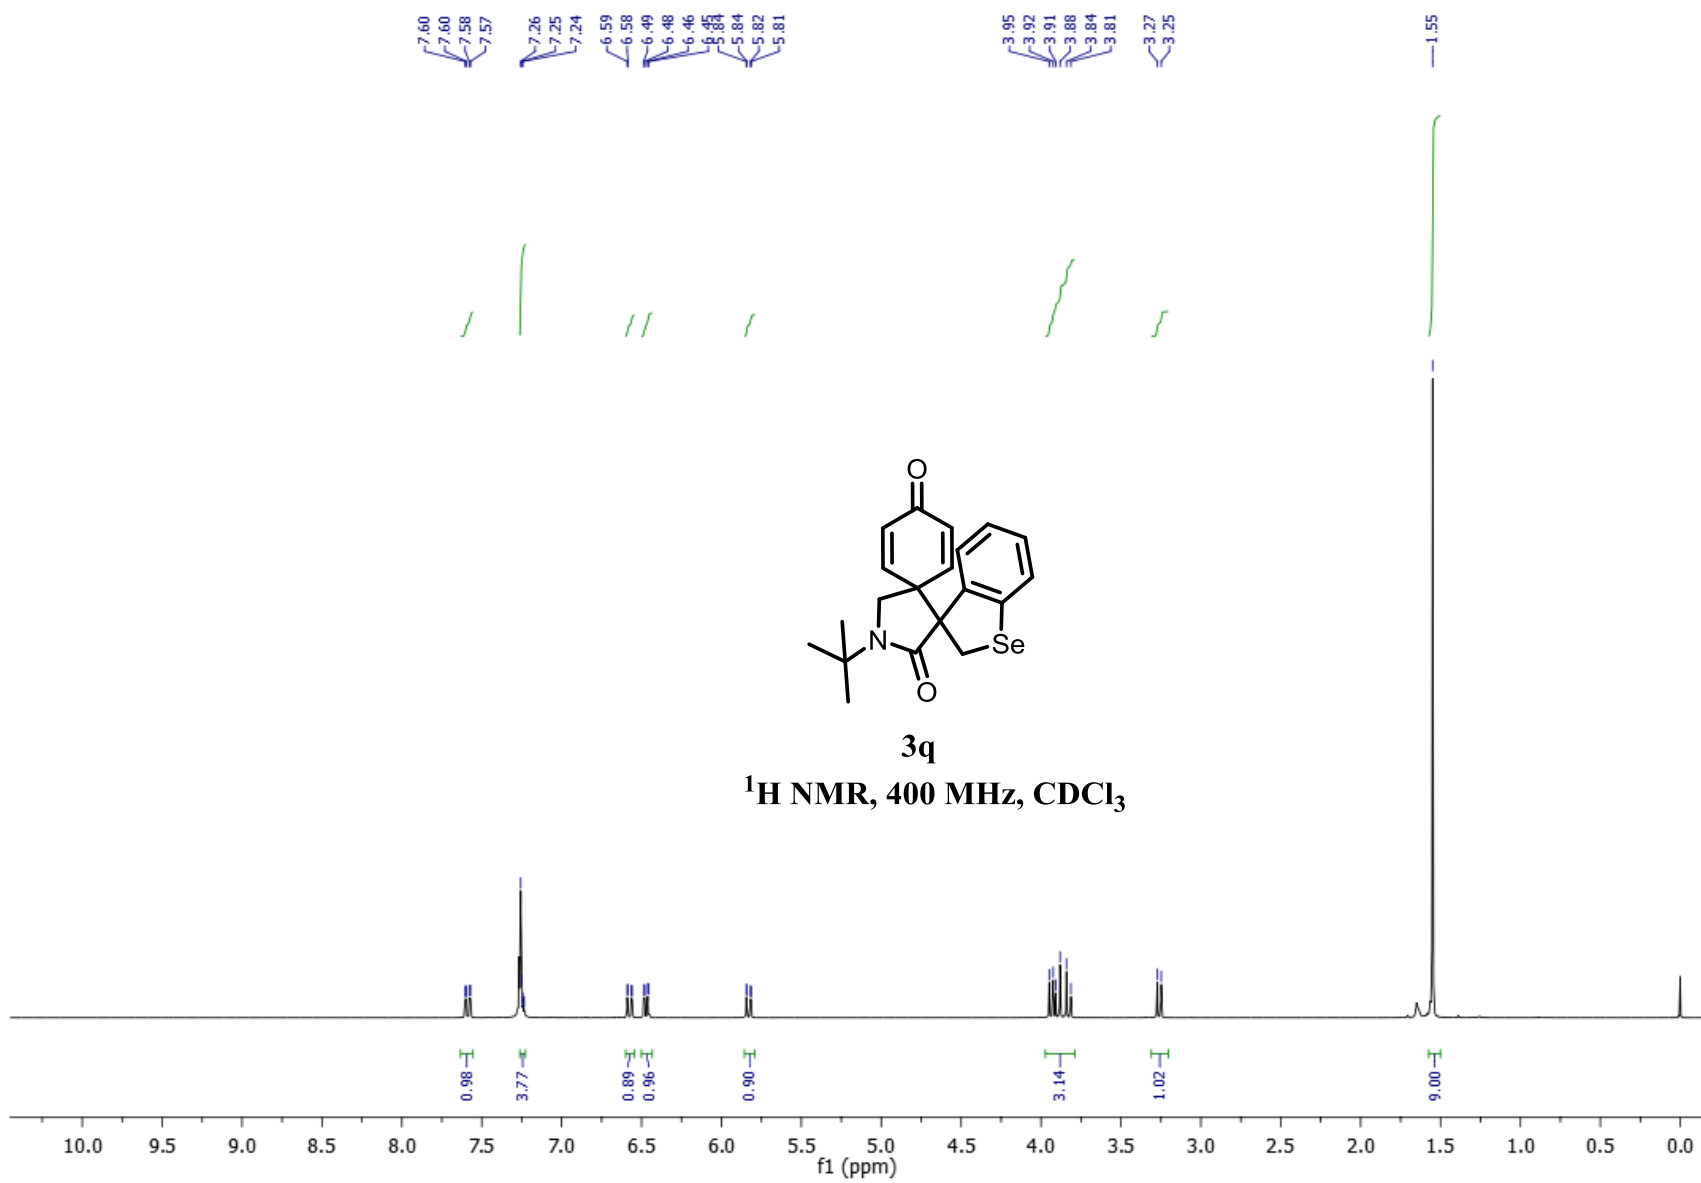

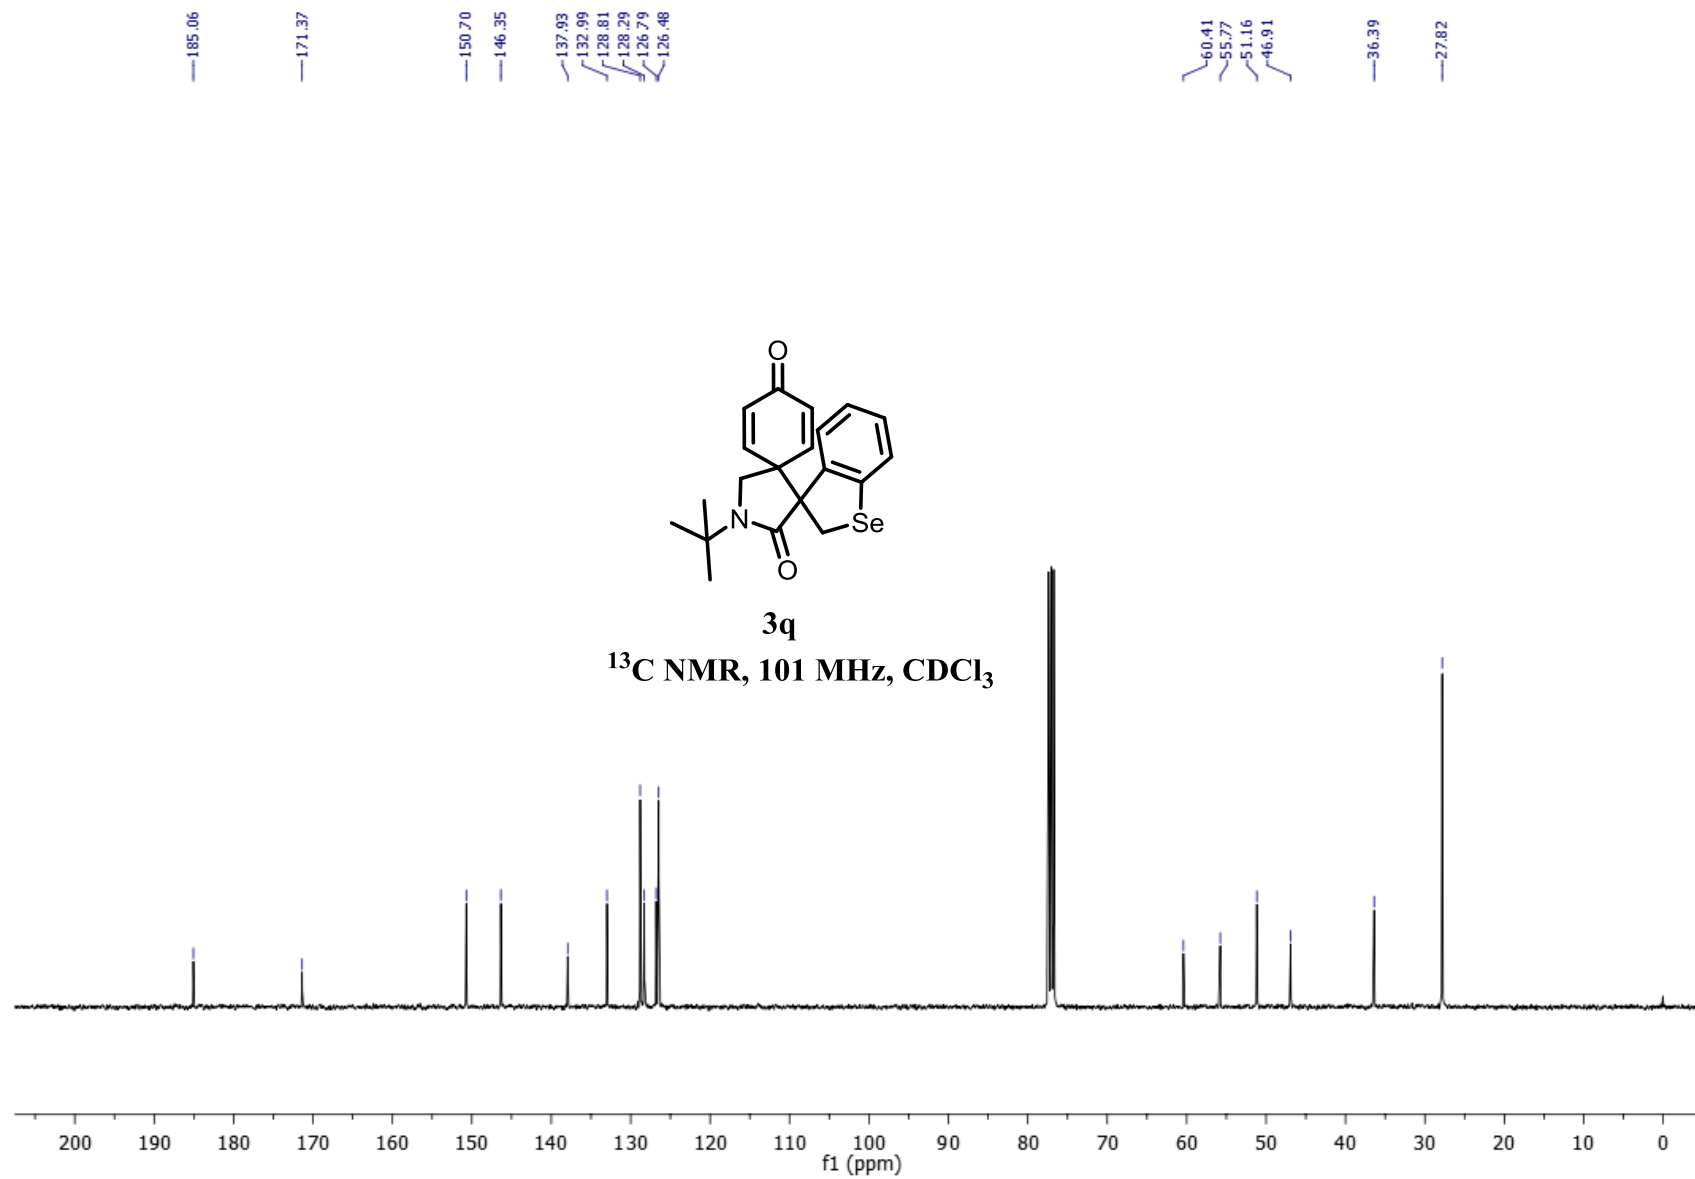

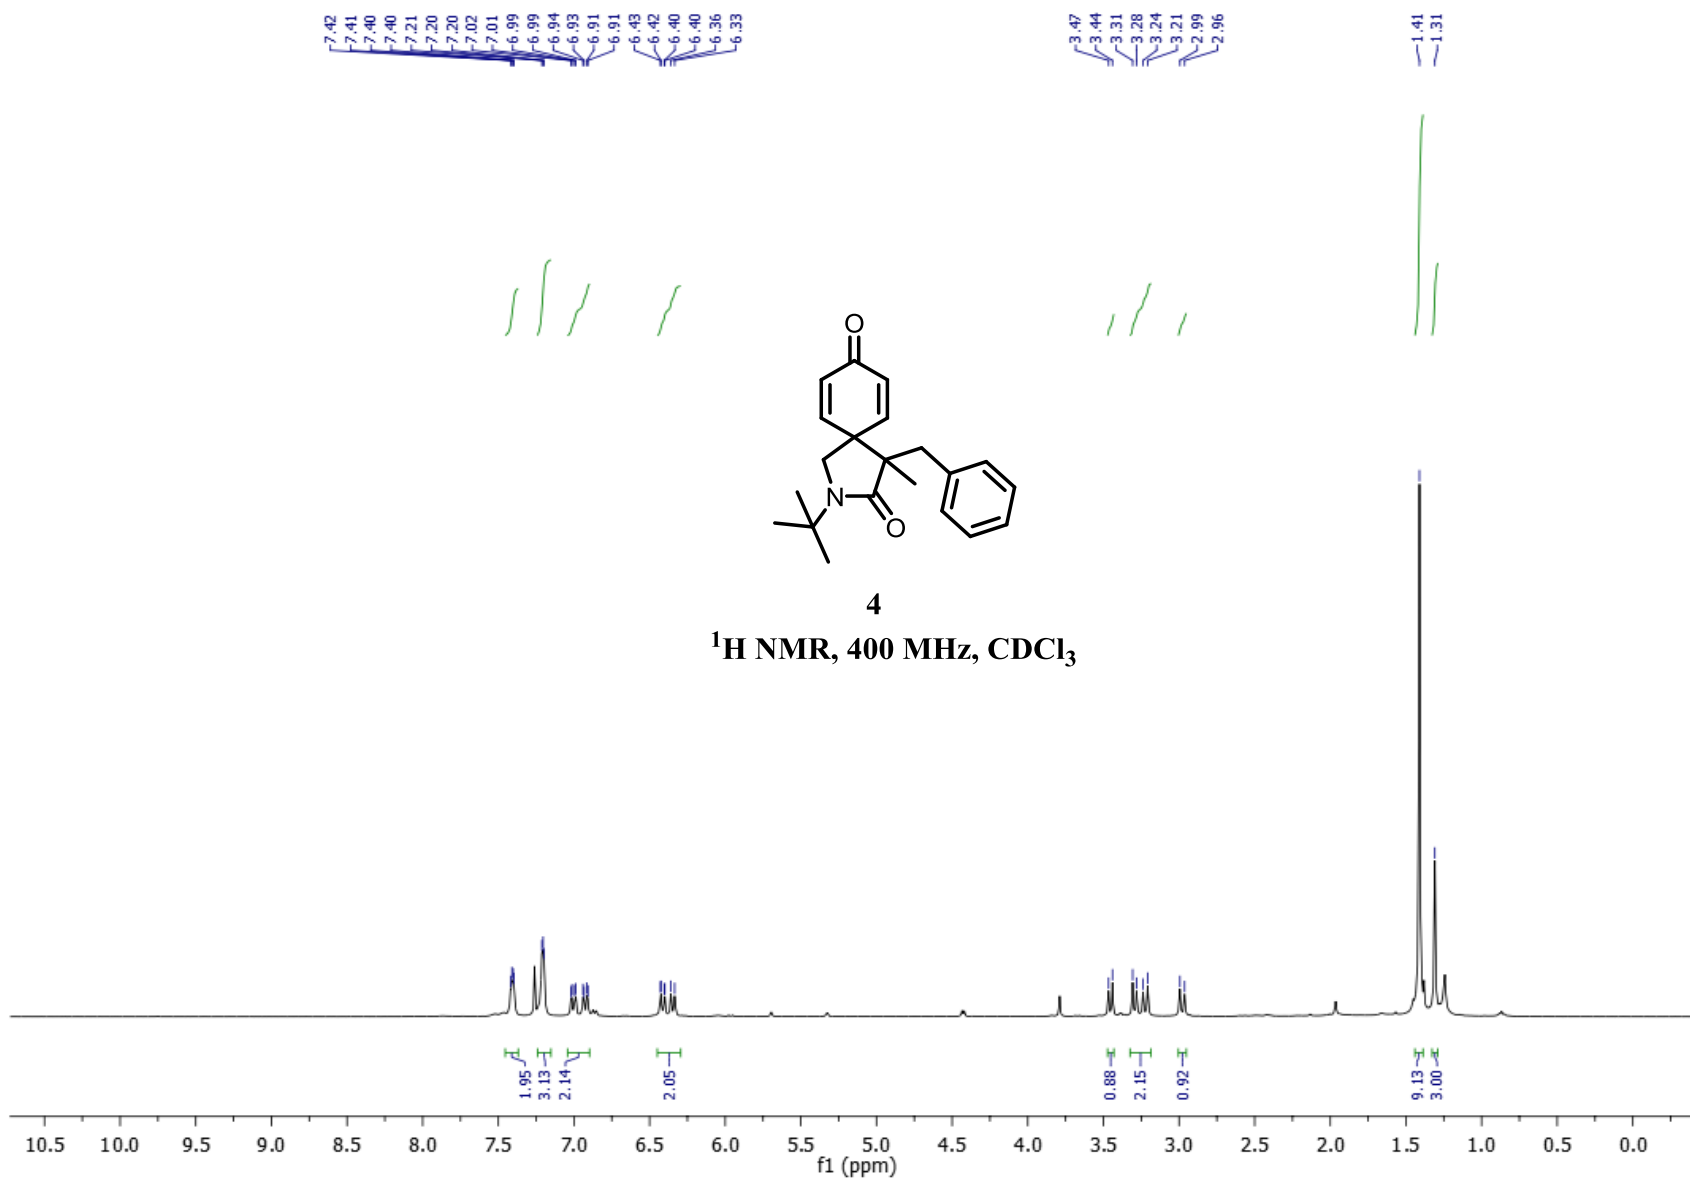

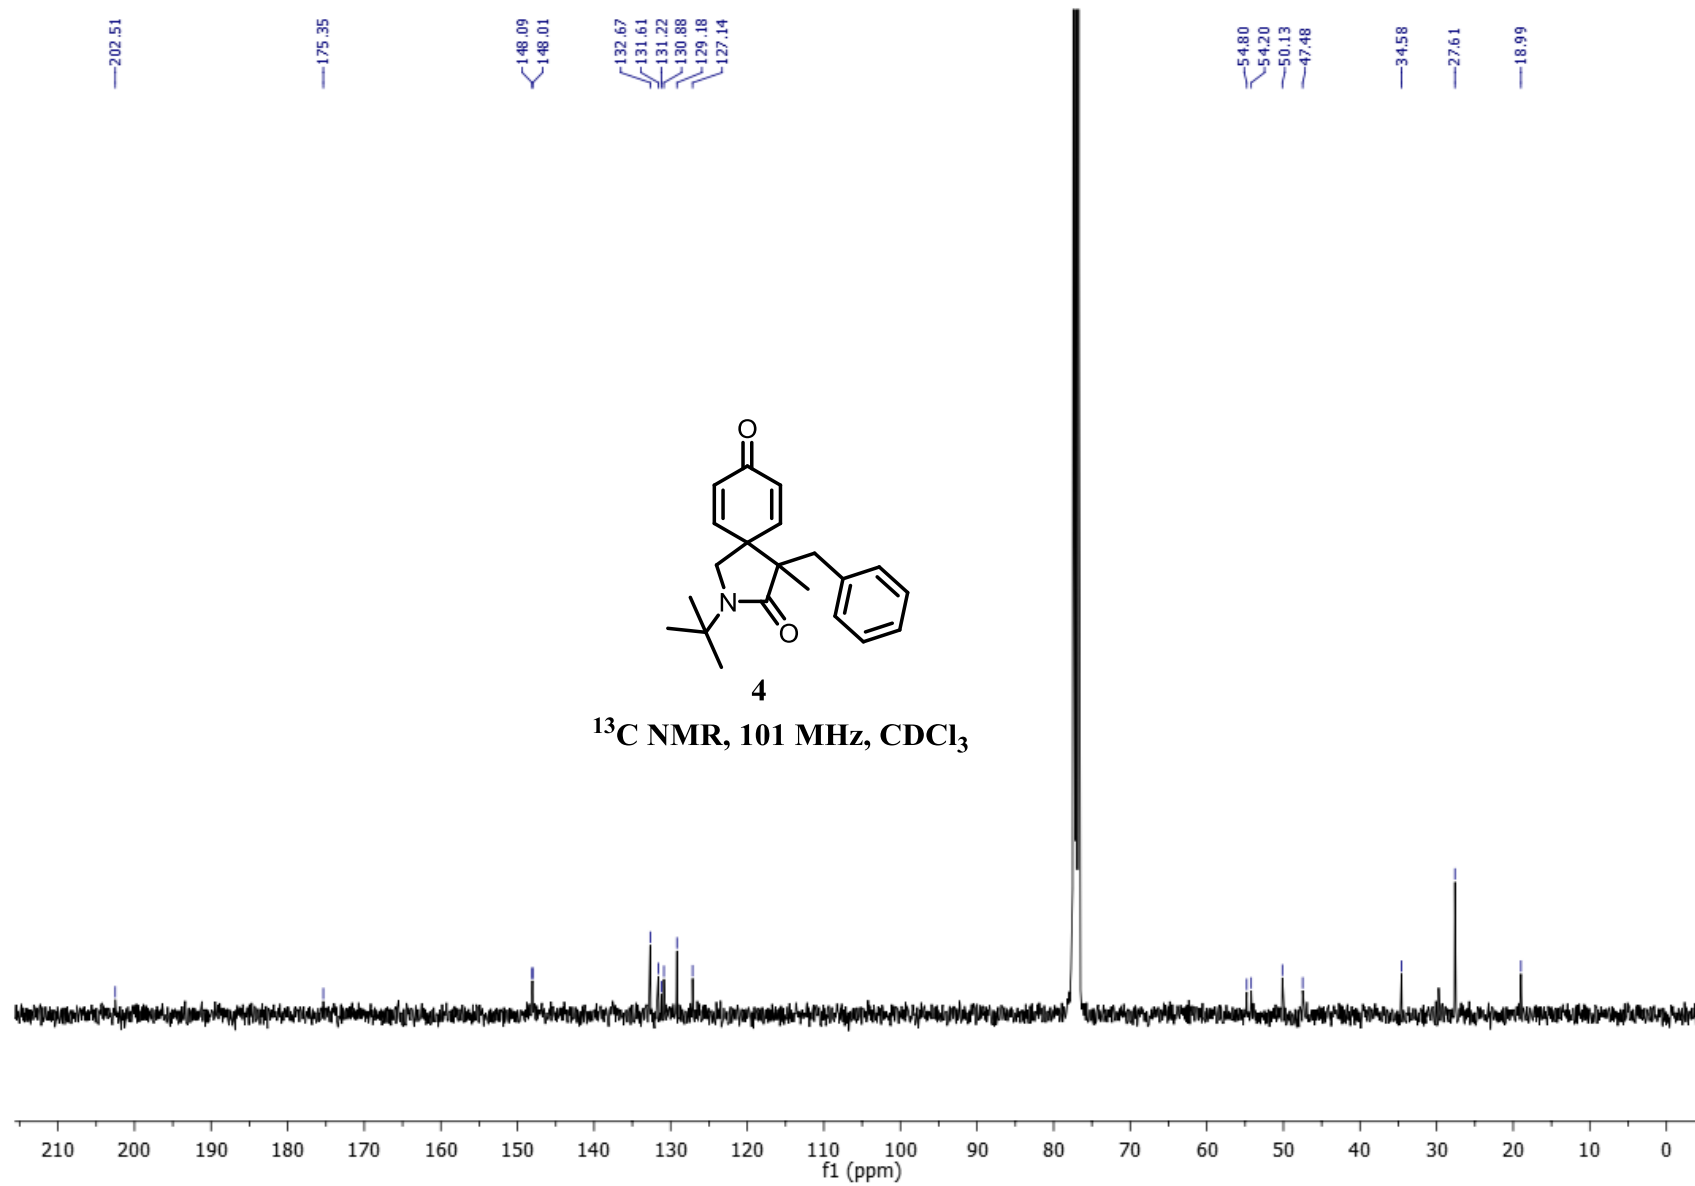

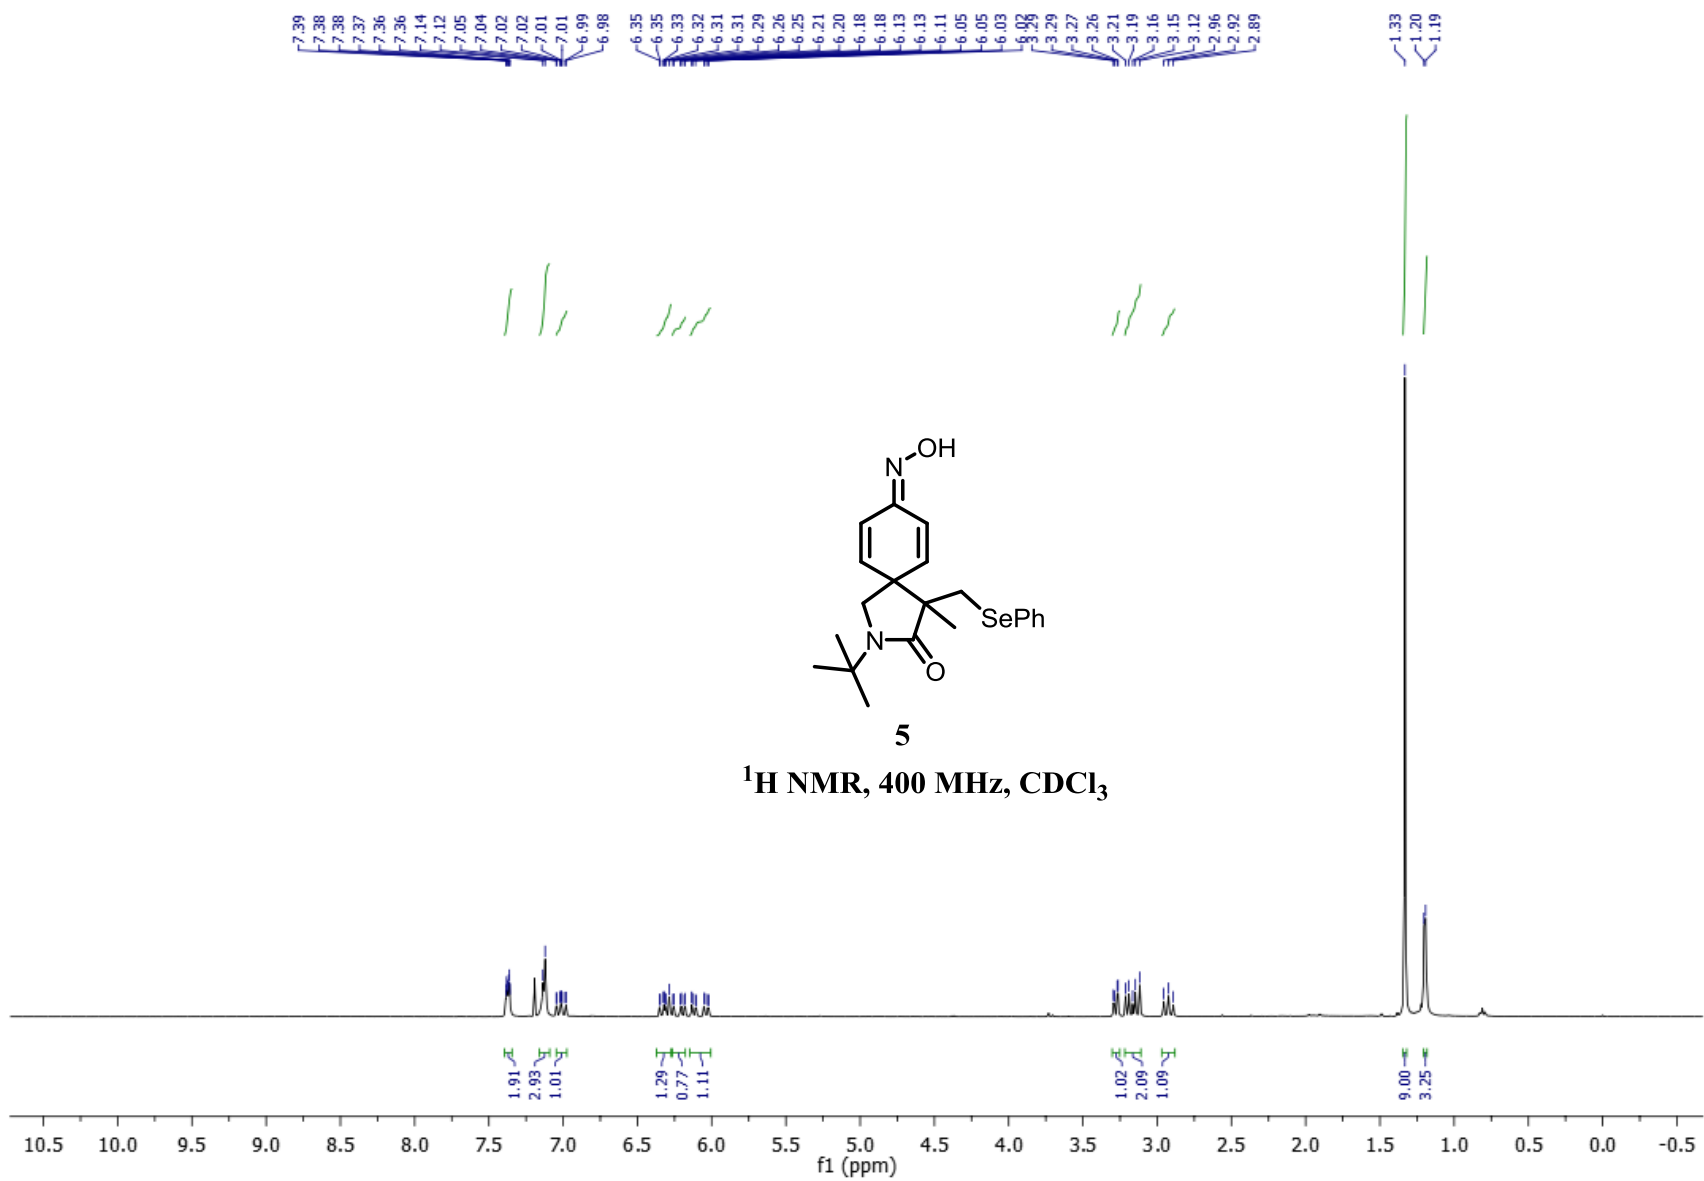

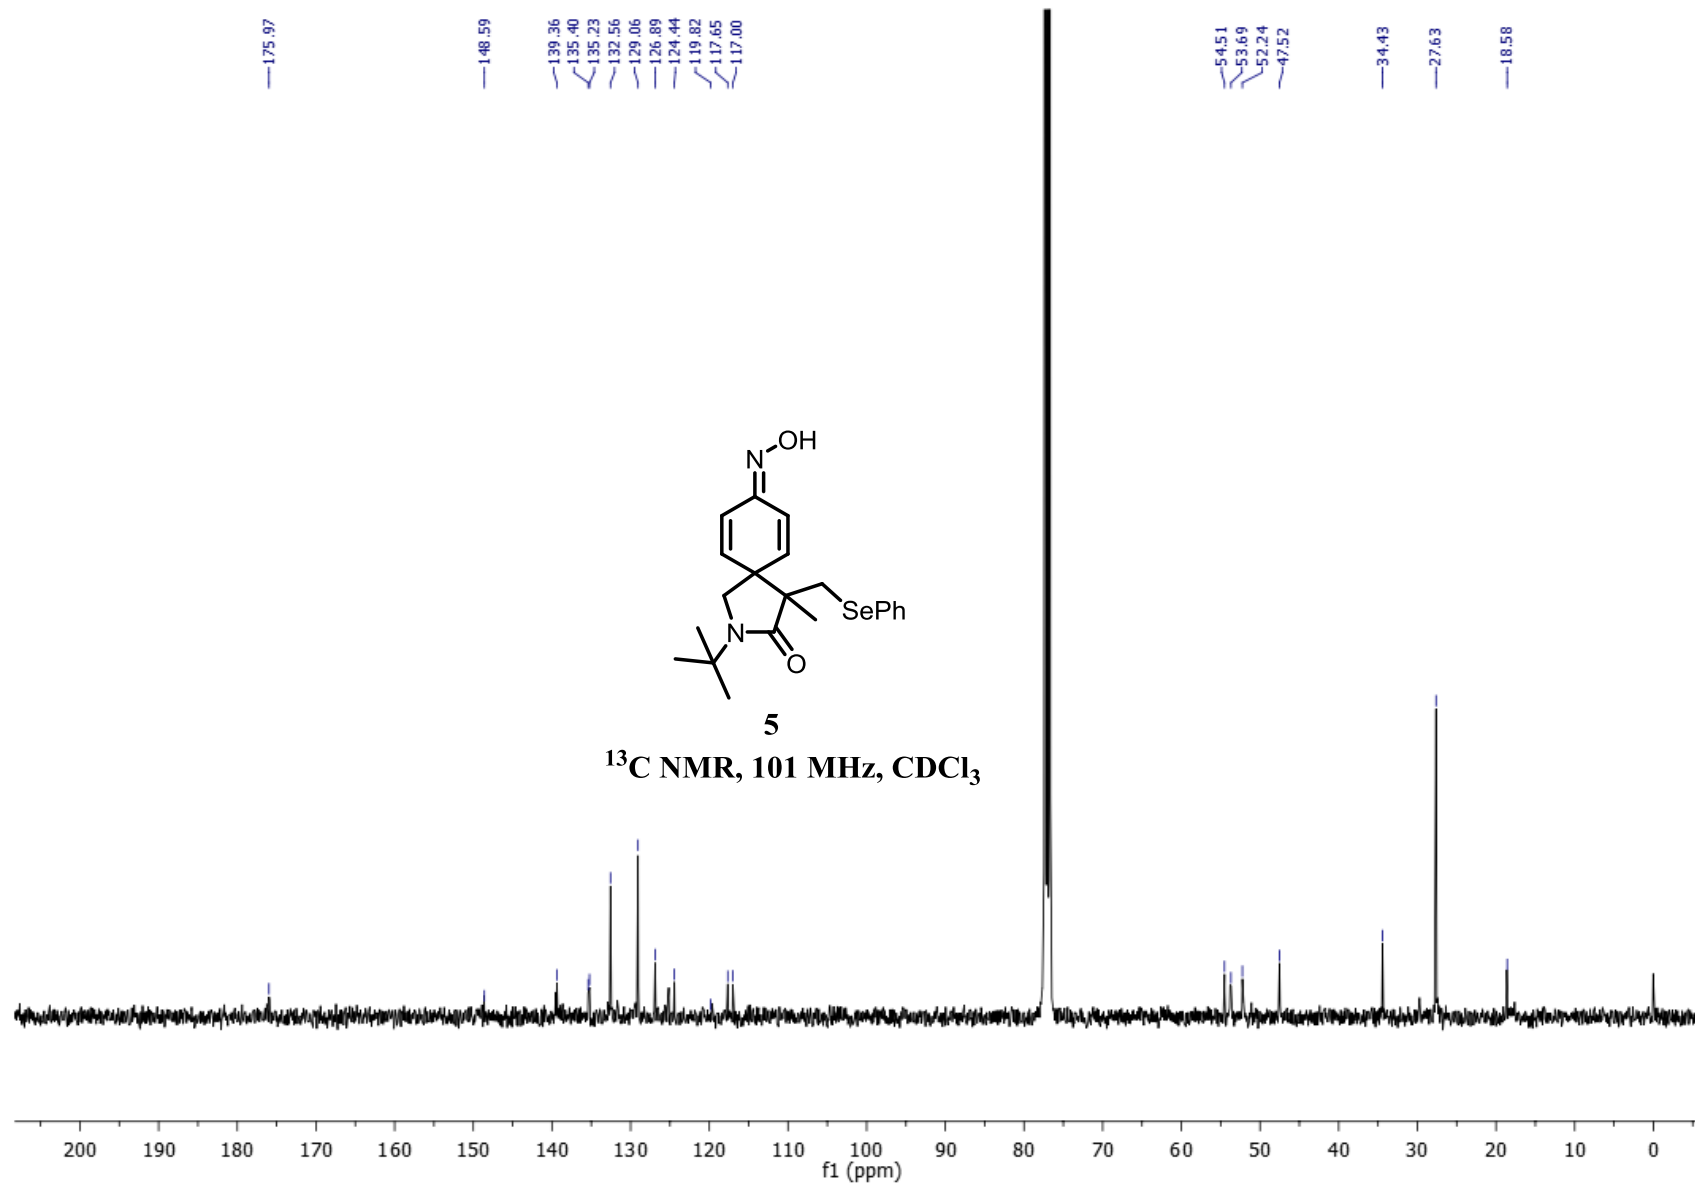

—248.22

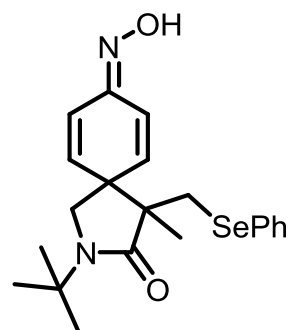

5

<sup>77</sup>Se NMR, 76 MHz, CDCl<sub>3</sub>

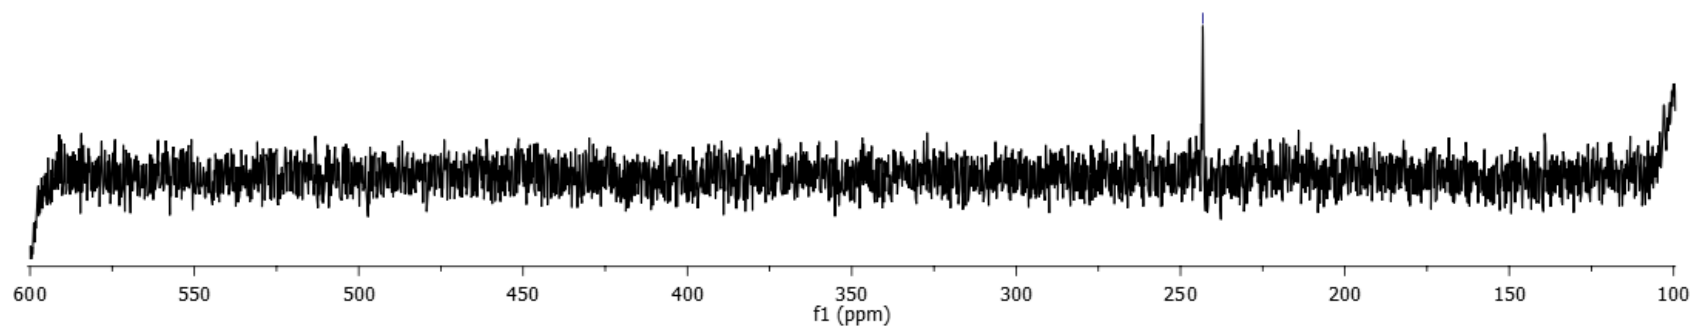



## Elemental Composition Report

### Single Mass Analysis

Tolerance = 100.0 PPM / DBE: min = 1.5, max = 50.0

Element prediction: Off

Number of isotope peaks used for i-FIT = 3

Monoisotopic Mass, Even Electron Ions

113 formula(e) evaluated with 1 results within limits (all results (up to 1000) for each mass)

Elements Used:

C: 0-15 H: 0-23 B: 0-1 N: 0-1 O: 0-1 Na: 0-1 P: 0-2 Se: 0-1

300523\_CRR-AR-5-313 8 (0.290) AM2 (Ar,12000.0,0.00,0.00); Cm (7:15-(16:26+3:4))

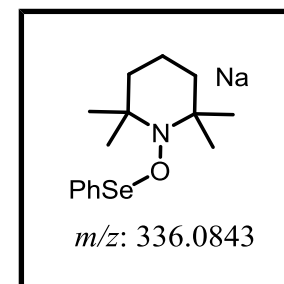

1: TOF MS ES+  
4.39e+006

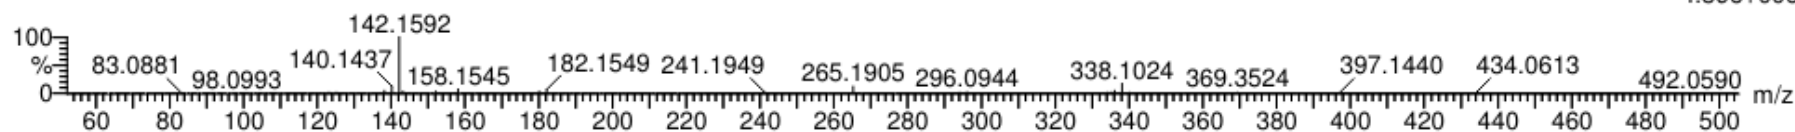

Minimum: 1.5  
Maximum: 5.0 100.0 50.0

| Mass     | Calc. Mass | mDa  | PPM  | DBE | i-FIT | Norm | Conf (%) | Formula           |
|----------|------------|------|------|-----|-------|------|----------|-------------------|
| 336.1038 | 336.0843   | 19.5 | 58.0 | 5.5 | 301.7 | n/a  | n/a      | C15 H23 N O Na Se |
